# Supplementary material for: A recyclable and base-free method for the synthesis of 3-iodothiophenes by the iodoheterocyclisation of 1-mercapto-3-alkyn-2-ols in ionic liquids
Source: Royal Society of Chemistry journal article supplement (doi:10.1039/c3ob41928b), 2013-11-14
Supplement: c3ob41928b.pdf [file c3ob41928b.pdf]

## Supplementary Information for

### A recyclable and base-free method for the synthesis of 3-iodothiophenes by the iodoheterocyclization of 1-mercapto-3-yn-2-ols in ionic liquids

Raffaella Mancuso,<sup>\*,a</sup> Christian S. Pomelli,<sup>b</sup> Cinzia Chiappe,<sup>b</sup> Richard C. Larock<sup>c</sup> and Bartolo Gabriele<sup>a,\*</sup>

*raffaella.mancuso@unical.it; bartolo.gabriele@unical.it*

<sup>a</sup> Dipartimento di Chimica e Tecnologie Chimiche, Università della Calabria, Via P. Bucci, 12/C,  
87036 Arcavacata di Rende (CS), Italy

<sup>b</sup> Dipartimento di Farmacia, Università di Pisa, Via Bonanno 33, 56126 Pisa, Italy

<sup>c</sup> Department of Chemistry, Iowa State University, Ames, Iowa 50011, United States

## Table of Contents

**Pages S2–S6**      **Copy of <sup>1</sup>H NMR Spectra for Products 2a-2j**

**Pages S7–S97**      **Tables of Atom Coordinates and Absolute Energies**

S 2

3-Iodo-4,5-dimethyl-2-phenylthiophene (**2a**)

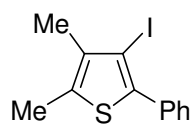

$^1\text{H NMR}$  (300 MHz,  $\text{CDCl}_3$ )

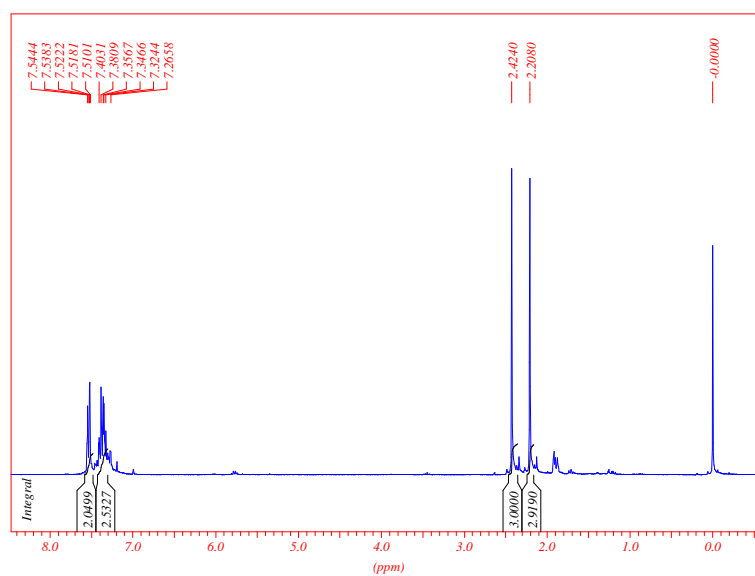

3-Iodo-4,5-dimethyl-2-*p*-tolylthiophene (**2b**)

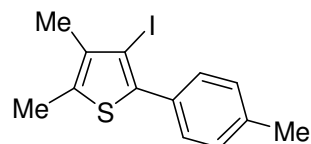

$^1\text{H NMR}$  (300 MHz,  $\text{CDCl}_3$ )

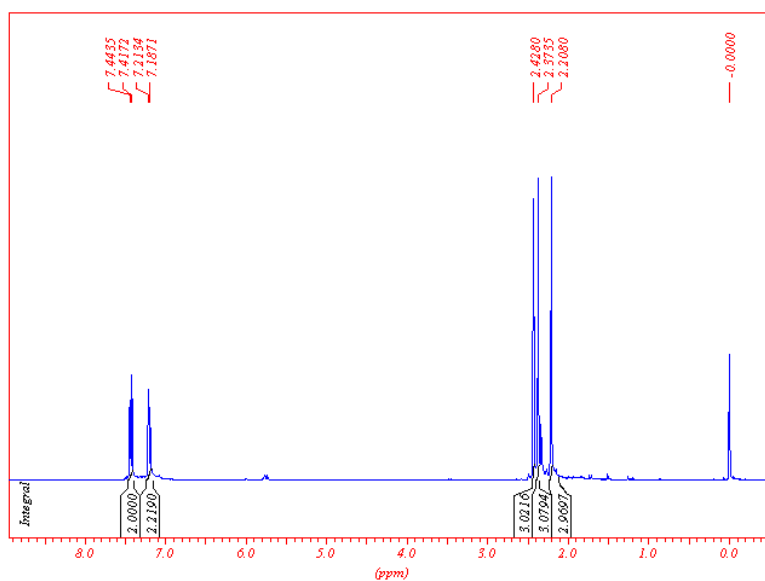

S 3

2-(4-Bromophenyl)-3-iodo-4,5-dimethylthiophene (**2c**)

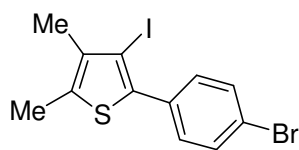

$^1\text{H NMR}$  (300 MHz,  $\text{CDCl}_3$ )

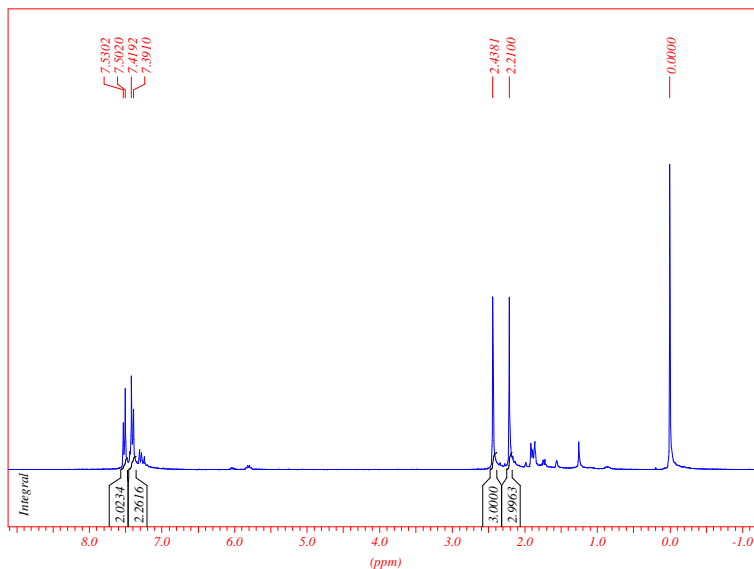

3-(3-Iodo-4,5-dimethylthiophen-2-yl)thiophene (**2d**)

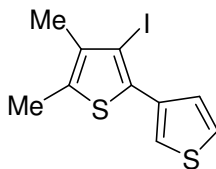

$^1\text{H NMR}$  (300 MHz,  $\text{CDCl}_3$ )

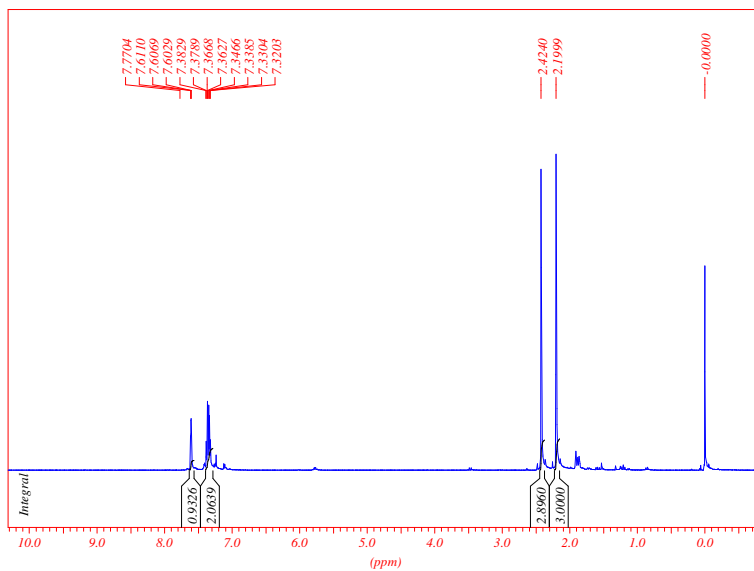

S 4

2-Cyclohex-1-enyl-3-iodo-4,5-dimethylthiophene (**2e**)

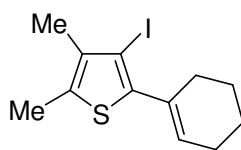

$^1\text{H}$  NMR (300 MHz,  $\text{CDCl}_3$ )

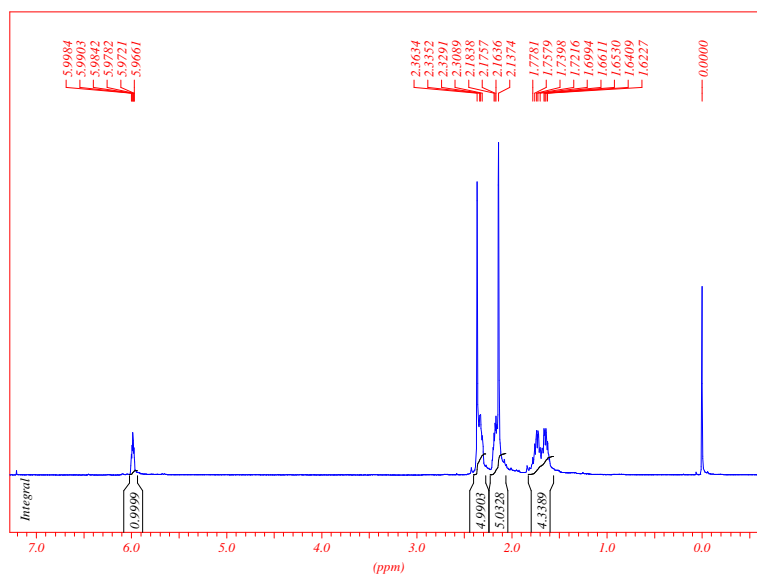

2-Butyl-3-iodo-4,5-dimethylthiophene (**2f**)

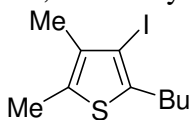

$^1\text{H}$  NMR (300 MHz,  $\text{CDCl}_3$ )

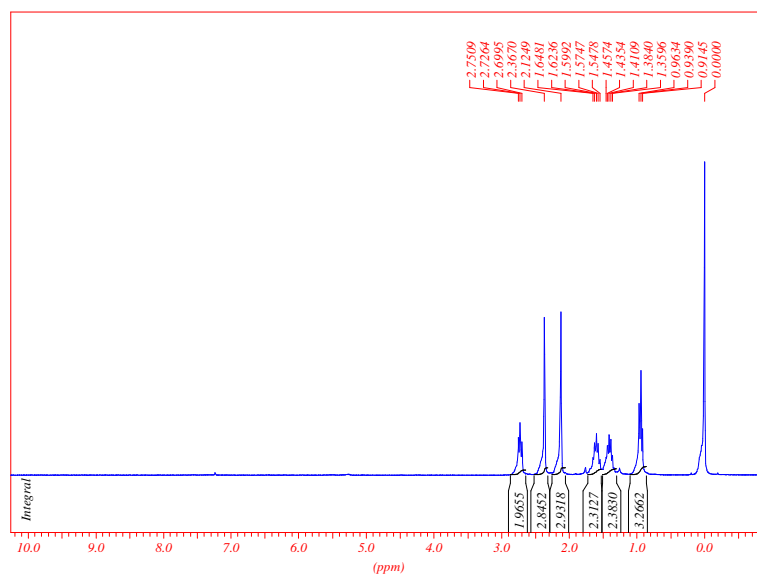

S 5

2-*tert*-Butyl-3-iodo-4,5-dimethylthiophene (**2g**)

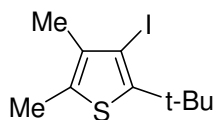

$^1\text{H}$  NMR (300 MHz,  $\text{CDCl}_3$ )

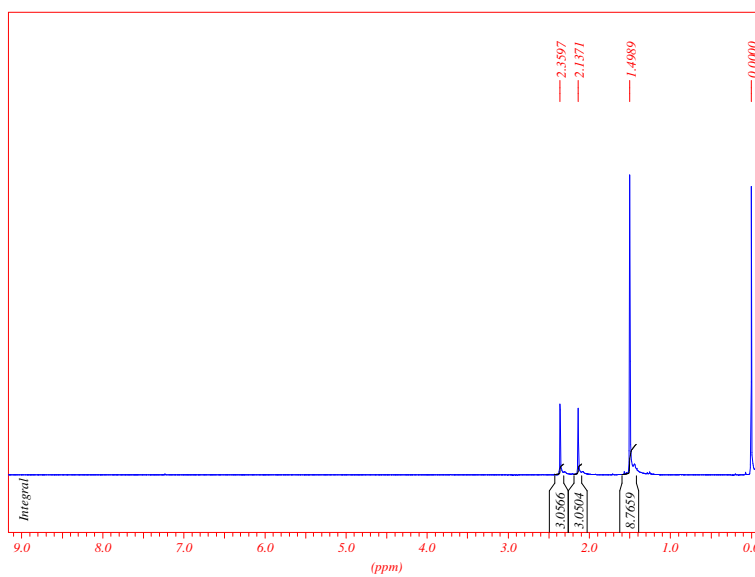

3-Iodo-4,5-dimethyl-2-phenethylthiophene (**2h**)

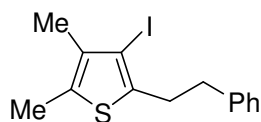

$^1\text{H}$  NMR (300 MHz,  $\text{CDCl}_3$ )

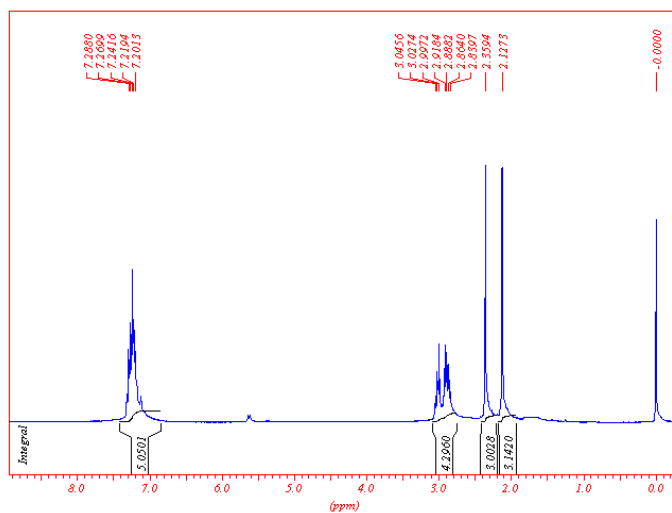

3-Iodo-5-methyl-2-phenyl-4-phenylethynylthiophene (**2i**)

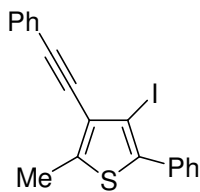

$^1\text{H}$  NMR (300 MHz,  $\text{CDCl}_3$ )

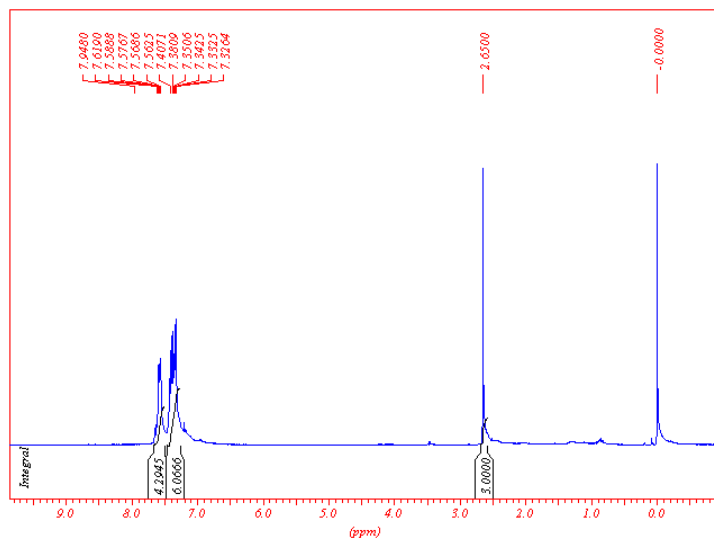

3-Iodo-2-phenylthiophene (**2j**)

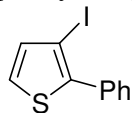

$^1\text{H}$  NMR (300 MHz,  $\text{CDCl}_3$ )

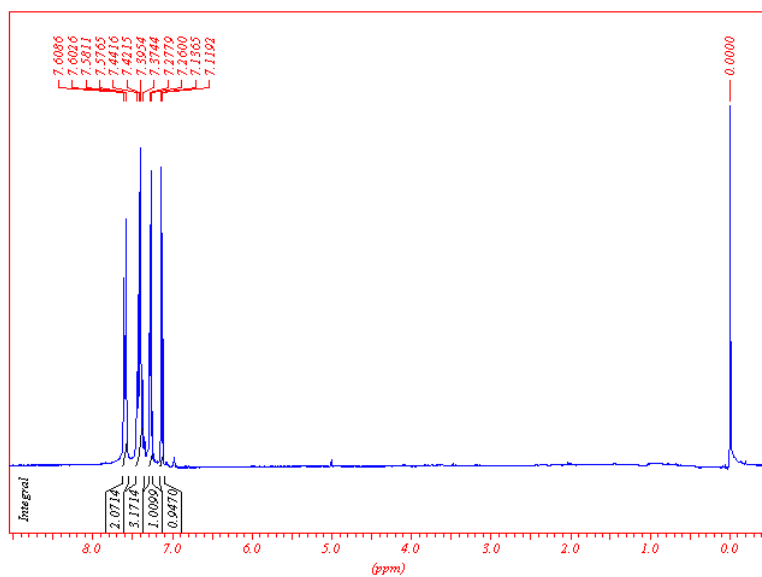

**Tables of Atom Coordinates and Absolute Energies**

| R(S-C) | Bu-Br        | Ph-Br        | Bu-NO3       | Ph-NO3       | Bu-EtSO4     | Ph-EtSO4     |
|--------|--------------|--------------|--------------|--------------|--------------|--------------|
| 5.4    | -903.2908326 | -977.0982731 | -1437.671004 | -1511.480178 | -2433.678195 | -2507.486748 |
| 5.2    | -903.2937253 | -977.1012715 | -1437.671085 | -1511.479323 | -2433.682331 | -2507.490936 |
| 5.0    | -903.2933394 | -977.1015947 | -1437.660065 | -1511.469575 | -2433.683567 | -2507.492579 |
| 4.8    | -903.2907438 | -977.0997702 | -1437.658629 | -1511.468468 | -2433.682671 | -2507.492101 |
| 4.6    | -903.2773686 | -977.0942037 | -1437.641208 | -1511.466252 | -2433.674457 | -2507.490531 |
| 4.4    | -903.2805807 | -977.0956611 | -1437.647523 | -1511.465023 | -2433.676422 | -2507.487082 |
| 4.2    | -903.2833401 | -977.0966631 | -1437.641177 | -1511.451029 | -2433.676101 | -2507.484901 |
| 4.0    | -903.2856461 | -977.0971393 | -1437.646942 | -1511.45615  | -2433.678498 | -2507.484602 |
| 3.8    | -903.2873927 | -977.0983582 | -1437.654755 | -1511.463275 | -2433.679951 | -2507.487528 |
| 3.6    | -903.2882612 | -977.0996805 | -1437.665573 | -1511.474335 | -2433.678991 | -2507.490186 |
| 3.4    | -903.2881128 | -977.1002298 | -1437.679751 | -1511.459231 | -2433.681475 | -2507.492645 |
| 3.2    | -903.2868302 | -977.1003013 | -1437.652527 | -1511.464598 | -2433.682858 | -2507.495056 |
| 3.0    | -903.2868735 | -977.1004762 | -1437.659154 | -1511.470945 | -2433.674503 | -2507.487365 |
| 2.8    | -903.2883474 | -977.1011407 | -1437.667631 | -1511.478591 | -2433.683368 | -2507.495522 |
| 2.6    | -903.2919794 | -977.1030228 | -1437.678455 | -1511.48815  | -2433.695035 | -2507.505899 |
| 2.4    | -903.2987627 | -977.1072047 | -1437.691904 | -1511.500567 | -2433.709408 | -2507.516834 |
| 2.2    | -903.3118778 | -977.1200185 | -1437.707532 | -1511.515586 | -2433.725885 | -2507.532781 |
| 2.0    | -903.3255051 | -977.1332668 | -1437.722518 | -1511.530286 | -2433.741813 | -2507.547423 |
| 1.8    | -903.3320019 | -977.139171  | -1437.729417 | -1511.536842 | -2433.749516 | -2507.554326 |
| 1ec    | -903.0352160 | -976.8748132 | -1437.383262 | -1511.213087 | -2433.258297 | -2507.09883  |
| 1r     | -903.0728651 | -976.9125580 | -1437.436389 | -1511.276072 | -2433.318109 | -2507.15822  |
| 1ts    |              | -976.8673624 |              |              |              |              |

Absolute energies in Hartrees. Zero point energy enclosed.

Molecular geometries in xyz format

33  
Bu-Br 1ec  
6 -0.682422 1.750045 0.717552  
6 0.356812 1.124234 0.632959  
6 1.713791 0.523685 0.600162  
6 2.698016 1.759212 0.765097  
6 1.844716 -0.499072 1.743427  
1 1.054769 -1.246020 1.650232  
1 2.811589 -0.996014 1.670614  
1 1.773183 -0.013587 2.720231  
6 2.767074 2.594670 -0.515877  
1 3.347508 3.501818 -0.335150  
1 1.764757 2.876507 -0.855259  
8 1.838703 -0.095321 -0.662340  
1 2.712296 -0.554211 -0.742955  
53 -1.912179 -0.853629 0.233481  
1 2.297313 2.371164 1.578570  
1 3.245445 2.028223 -1.315186  
16 4.388048 1.340316 1.387178  
35 -3.665445 -2.781216 -0.057947  
1 4.710284 0.404650 0.427069  
35 4.812945 -1.441332 -1.093501  
6 -1.813434 2.675781 0.809913  
6 -2.372209 3.107991 -0.559537  
1 -1.476557 3.561498 1.363815  
1 -2.612144 2.222820 1.407337  
6 -3.542363 4.088144 -0.432060  
1 -1.566120 3.562453 -1.145164  
1 -2.691812 2.217099 -1.108782  
6 -4.104079 4.525973 -1.787980  
1 -4.340190 3.623545 0.160262  
1 -3.218003 4.972196 0.131448  
1 -4.937989 5.223883 -1.668261  
1 -3.337521 5.022443 -2.391206  
1 -4.467613 3.666565 -2.359493

33  
Bu-Br 1r  
6 -0.775142 0.195435 1.119436  
6 0.076600 -0.671264 0.567176  
6 -0.493078 -2.041860 0.209787  
6 -1.717765 -2.236834 1.146548  
6 -0.838661 -2.094077 -1.286042  
1 0.055686 -1.870923 -1.871145  
1 -1.186534 -3.093297 -1.557729  
1 -1.608169 -1.362629 -1.545519  
6 -2.773181 -3.245192 0.712719  
1 -3.542985 -3.355854 1.481393  
1 -2.299537 -4.220409 0.569546  
8 0.393439 -3.120665 0.531333  
1 1.294857 -2.831199 0.324599  
53 2.150168 -0.245252 0.063329  
1 -1.300777 -2.533528 2.110958  
1 -3.263593 -2.956788 -0.218603  
16 -2.409230 -0.540347 1.429329  
35 5.146559 0.299607 -0.672841  
1 -3.735086 -0.138821 -0.225978  
35 -4.777156 0.151762 -1.261939  
6 -0.577999 1.632538 1.499011  
6 -1.220577 2.629920 0.516555  
1 0.497872 1.820821 1.551158  
1 -0.984606 1.800944 2.504236  
6 -0.996434 4.089758 0.924970  
1 -0.801747 2.458529 -0.481075  
1 -2.297030 2.435573 0.437763  
6 -1.622728 5.089569 -0.051875  
1 -1.408742 4.252351 1.929043  
1 0.080525 4.279761 1.001999



## S9

|   |           |          |           |
|---|-----------|----------|-----------|
| 1 | -1.447326 | 6.122137 | 0.265300  |
| 1 | -1.201968 | 4.974137 | -1.055522 |
| 1 | -2.704904 | 4.942559 | -0.129188 |

33

Bu-Br RCS=1.8

|    |           |           |           |
|----|-----------|-----------|-----------|
| 6  | -0.900356 | 0.769597  | 0.295910  |
| 6  | -0.117215 | -0.287010 | 0.527913  |
| 6  | -0.786439 | -1.482991 | 1.201083  |
| 6  | -2.011720 | -0.898301 | 1.958159  |
| 6  | -1.149772 | -2.540719 | 0.148212  |
| 1  | -0.247590 | -2.839645 | -0.389174 |
| 1  | -1.570956 | -3.425261 | 0.631560  |
| 1  | -1.866986 | -2.152077 | -0.579278 |
| 6  | -3.153049 | -1.852494 | 2.283222  |
| 1  | -3.920531 | -1.350560 | 2.878880  |
| 1  | -2.765334 | -2.688548 | 2.871922  |
| 8  | 0.023988  | -2.083713 | 2.219137  |
| 1  | 0.941335  | -2.073497 | 1.907284  |
| 53 | 1.973255  | -0.443725 | -0.044303 |
| 1  | -1.608492 | -0.479433 | 2.882256  |
| 1  | -3.627929 | -2.250672 | 1.384808  |
| 16 | -2.558155 | 0.570888  | 0.968379  |
| 35 | 5.003640  | -0.713338 | -0.813449 |
| 1  | -3.838800 | -0.153521 | -0.622026 |
| 35 | -4.825573 | -0.555156 | -1.672169 |
| 6  | -0.584949 | 2.061849  | -0.400687 |
| 6  | -0.263586 | 3.217156  | 0.566055  |
| 1  | -1.429263 | 2.348050  | -1.040734 |
| 1  | 0.270120  | 1.893293  | -1.060881 |
| 6  | 0.038947  | 4.532225  | -0.159736 |
| 1  | -1.104300 | 3.362473  | 1.254789  |
| 1  | 0.597522  | 2.928832  | 1.178506  |
| 6  | 0.372170  | 5.682118  | 0.795752  |
| 1  | 0.876745  | 4.377543  | -0.849593 |
| 1  | -0.822219 | 4.810661  | -0.780564 |
| 1  | 0.583844  | 6.607234  | 0.250906  |
| 1  | -0.459009 | 5.881081  | 1.480552  |
| 1  | 1.251386  | 5.445640  | 1.403004  |

33

Bu-Br RCS=2.0

|    |           |           |           |
|----|-----------|-----------|-----------|
| 6  | -0.825595 | 0.805409  | 0.248045  |
| 6  | -0.072484 | -0.247628 | 0.514549  |
| 6  | -0.728293 | -1.453685 | 1.182418  |
| 6  | -1.960639 | -0.910451 | 1.962457  |
| 6  | -1.076876 | -2.505376 | 0.118292  |
| 1  | -0.173496 | -2.778149 | -0.431040 |
| 1  | -1.472488 | -3.404602 | 0.595438  |
| 1  | -1.809686 | -2.124154 | -0.596611 |
| 6  | -3.021152 | -1.936416 | 2.347031  |
| 1  | -3.787744 | -1.481094 | 2.979722  |
| 1  | -2.551106 | -2.743870 | 2.915214  |
| 8  | 0.098926  | -2.050088 | 2.189244  |
| 1  | 1.010999  | -2.046380 | 1.862362  |
| 53 | 2.046438  | -0.387620 | -0.040749 |
| 1  | -1.549776 | -0.457249 | 2.866512  |
| 1  | -3.515034 | -2.365985 | 1.473499  |
| 16 | -2.657595 | 0.498660  | 0.989448  |
| 35 | 5.045774  | -0.648690 | -0.767325 |
| 1  | -3.822668 | -0.308842 | -0.587440 |
| 35 | -4.767729 | -0.774181 | -1.663404 |
| 6  | -0.596850 | 2.105438  | -0.442062 |
| 6  | -0.513369 | 3.312171  | 0.510552  |
| 1  | -1.394810 | 2.273035  | -1.176130 |
| 1  | 0.337622  | 2.018195  | -1.005701 |
| 6  | -0.285769 | 4.635106  | -0.228197 |
| 1  | -1.434006 | 3.373364  | 1.101934  |
| 1  | 0.303114  | 3.141531  | 1.220750  |
| 6  | -0.191484 | 5.839385  | 0.713613  |
| 1  | 0.633277  | 4.563687  | -0.821706 |

## S10

|   |           |          |           |
|---|-----------|----------|-----------|
| 1 | -1.101273 | 4.794878 | -0.944889 |
| 1 | -0.029504 | 6.769262 | 0.159981  |
| 1 | -1.109020 | 5.955692 | 1.299875  |
| 1 | 0.638031  | 5.723407 | 1.418185  |

33

Bu-Br RCS=2.2

|    |           |           |           |
|----|-----------|-----------|-----------|
| 6  | -0.751338 | 0.847686  | 0.194588  |
| 6  | -0.042844 | -0.209774 | 0.490341  |
| 6  | -0.692748 | -1.427935 | 1.140680  |
| 6  | -1.932816 | -0.924121 | 1.939786  |
| 6  | -1.026580 | -2.462834 | 0.055480  |
| 1  | -0.120248 | -2.713160 | -0.499928 |
| 1  | -1.408324 | -3.375941 | 0.516661  |
| 1  | -1.766128 | -2.078431 | -0.649859 |
| 6  | -2.916467 | -2.012609 | 2.364397  |
| 1  | -3.678695 | -1.601781 | 3.031322  |
| 1  | -2.377953 | -2.795443 | 2.905593  |
| 8  | 0.144083  | -2.030188 | 2.135719  |
| 1  | 1.050768  | -2.041403 | 1.795157  |
| 53 | 2.113688  | -0.337524 | -0.045401 |
| 1  | -1.519431 | -0.448037 | 2.830801  |
| 1  | -3.424454 | -2.463119 | 1.509617  |
| 16 | -2.755710 | 0.434493  | 1.001907  |
| 35 | 5.070246  | -0.605364 | -0.713888 |
| 1  | -3.813945 | -0.409254 | -0.519147 |
| 35 | -4.731695 | -0.931225 | -1.624504 |
| 6  | -0.606830 | 2.156121  | -0.479857 |
| 6  | -0.680586 | 3.367897  | 0.465513  |
| 1  | -1.371709 | 2.247753  | -1.260237 |
| 1  | 0.363680  | 2.143255  | -0.990302 |
| 6  | -0.526664 | 4.702010  | -0.272015 |
| 1  | -1.635374 | 3.348024  | 1.001970  |
| 1  | 0.104975  | 3.271485  | 1.222983  |
| 6  | -0.593798 | 5.913817  | 0.662364  |
| 1  | 0.427936  | 4.710076  | -0.811482 |
| 1  | -1.310113 | 4.786033  | -1.035631 |
| 1  | -0.482091 | 6.851907  | 0.110245  |
| 1  | -1.550733 | 5.950881  | 1.193105  |
| 1  | 0.199805  | 5.874626  | 1.415195  |

33

Bu-Br RCS=2.4

|    |           |           |           |
|----|-----------|-----------|-----------|
| 6  | -0.676152 | 0.904201  | 0.113863  |
| 6  | -0.040963 | -0.167797 | 0.443195  |
| 6  | -0.695724 | -1.397550 | 1.061714  |
| 6  | -1.951782 | -0.929327 | 1.865029  |
| 6  | -1.005946 | -2.408667 | -0.052005 |
| 1  | -0.090815 | -2.639908 | -0.601720 |
| 1  | -1.385027 | -3.333885 | 0.385838  |
| 1  | -1.742642 | -2.017257 | -0.755691 |
| 6  | -2.879515 | -2.068154 | 2.292648  |
| 1  | -3.638664 | -1.698827 | 2.986076  |
| 1  | -2.296272 | -2.839729 | 2.802520  |
| 8  | 0.135565  | -2.009348 | 2.054868  |
| 1  | 1.035711  | -2.061005 | 1.702503  |
| 53 | 2.175417  | -0.293347 | -0.053030 |
| 1  | -1.547000 | -0.447000 | 2.756679  |
| 1  | -3.393475 | -2.517631 | 1.441281  |
| 16 | -2.858925 | 0.405383  | 0.977972  |
| 35 | 5.069300  | -0.595815 | -0.619215 |
| 1  | -3.734797 | -0.421103 | -0.355398 |
| 35 | -4.659096 | -1.069515 | -1.533422 |
| 6  | -0.613785 | 2.218530  | -0.539577 |
| 6  | -0.790007 | 3.416495  | 0.408932  |
| 1  | -1.362275 | 2.258092  | -1.339095 |
| 1  | 0.368732  | 2.270606  | -1.027947 |
| 6  | -0.706228 | 4.760910  | -0.320932 |
| 1  | -1.755090 | 3.327303  | 0.918044  |
| 1  | -0.020119 | 3.367947  | 1.186672  |
| 6  | -0.880589 | 5.960530  | 0.615193  |

## S11

|   |           |          |           |
|---|-----------|----------|-----------|
| 1 | 0.259753  | 4.836629 | -0.834609 |
| 1 | -1.472983 | 4.795335 | -1.104805 |
| 1 | -0.818269 | 6.906449 | 0.068879  |
| 1 | -1.851755 | 5.929686 | 1.119430  |
| 1 | -0.106841 | 5.971870 | 1.389364  |

33

Bu-Br RCS=2.6

|    |           |           |           |
|----|-----------|-----------|-----------|
| 6  | -0.590268 | 0.966442  | 0.065159  |
| 6  | -0.073201 | -0.126676 | 0.435843  |
| 6  | -0.717837 | -1.360988 | 1.039878  |
| 6  | -1.975470 | -0.915913 | 1.864466  |
| 6  | -1.030285 | -2.353096 | -0.088956 |
| 1  | -0.121163 | -2.561481 | -0.658355 |
| 1  | -1.388300 | -3.289897 | 0.341144  |
| 1  | -1.791604 | -1.965881 | -0.769611 |
| 6  | -2.879791 | -2.083884 | 2.268839  |
| 1  | -3.616815 | -1.750496 | 3.002342  |
| 1  | -2.274828 | -2.873756 | 2.721675  |
| 8  | 0.121275  | -1.971537 | 2.025592  |
| 1  | 0.990166  | -2.124338 | 1.629957  |
| 53 | 2.236401  | -0.256025 | -0.067377 |
| 1  | -1.565567 | -0.449396 | 2.762423  |
| 1  | -3.419240 | -2.489269 | 1.411310  |
| 16 | -2.930048 | 0.438261  | 1.068381  |
| 35 | 5.016542  | -0.627813 | -0.556496 |
| 1  | -3.570978 | -0.287966 | -0.027197 |
| 35 | -4.578774 | -1.201191 | -1.524708 |
| 6  | -0.640450 | 2.269015  | -0.590670 |
| 6  | -0.816468 | 3.469090  | 0.355492  |
| 1  | -1.437695 | 2.251905  | -1.342053 |
| 1  | 0.303537  | 2.363764  | -1.146083 |
| 6  | -0.843356 | 4.804351  | -0.395023 |
| 1  | -1.744923 | 3.339399  | 0.919968  |
| 1  | -0.000416 | 3.468886  | 1.086107  |
| 6  | -1.021213 | 6.007241  | 0.535971  |
| 1  | 0.085345  | 4.919744  | -0.967064 |
| 1  | -1.656383 | 4.788741  | -1.130908 |
| 1  | -1.039497 | 6.946304  | -0.024829 |
| 1  | -1.957952 | 5.936027  | 1.097594  |
| 1  | -0.204220 | 6.068792  | 1.261889  |

33

Bu-Br RCS=2.8

|    |           |           |           |
|----|-----------|-----------|-----------|
| 6  | -0.491905 | 1.022119  | 0.009753  |
| 6  | -0.115210 | -0.086731 | 0.439407  |
| 6  | -0.762079 | -1.307790 | 1.050779  |
| 6  | -2.004479 | -0.846477 | 1.893662  |
| 6  | -1.101745 | -2.295184 | -0.073905 |
| 1  | -0.204433 | -2.513766 | -0.658718 |
| 1  | -1.463678 | -3.227316 | 0.362574  |
| 1  | -1.872194 | -1.901160 | -0.740891 |
| 6  | -2.882874 | -2.021230 | 2.337778  |
| 1  | -3.599283 | -1.683417 | 3.089177  |
| 1  | -2.260526 | -2.804630 | 2.778372  |
| 8  | 0.086436  | -1.924089 | 2.026209  |
| 1  | 0.927390  | -2.139944 | 1.602652  |
| 53 | 2.281969  | -0.255909 | -0.082085 |
| 1  | -1.573499 | -0.366883 | 2.775101  |
| 1  | -3.447104 | -2.435155 | 1.500271  |
| 16 | -3.005444 | 0.489095  | 1.122410  |
| 35 | 4.985567  | -0.731776 | -0.532212 |
| 1  | -3.629959 | -0.245047 | 0.070748  |
| 35 | -4.630216 | -1.247980 | -1.528067 |
| 6  | -0.579523 | 2.316383  | -0.646656 |
| 6  | -0.697496 | 3.518592  | 0.307080  |
| 1  | -1.429854 | 2.287962  | -1.337431 |
| 1  | 0.318739  | 2.415698  | -1.272098 |
| 6  | -0.786215 | 4.850488  | -0.444267 |
| 1  | -1.584235 | 3.381452  | 0.932957  |
| 1  | 0.167133  | 3.526508  | 0.979445  |

## S12

|   |           |          |           |
|---|-----------|----------|-----------|
| 6 | -0.906903 | 6.055456 | 0.493139  |
| 1 | 0.099287  | 4.970191 | -1.080656 |
| 1 | -1.648815 | 4.826418 | -1.120955 |
| 1 | -0.970834 | 6.992265 | -0.068041 |
| 1 | -1.801743 | 5.979798 | 1.118663  |
| 1 | -0.041818 | 6.125084 | 1.160272  |

33

Bu-Br RCS=3.0

|    |           |           |           |
|----|-----------|-----------|-----------|
| 6  | -0.340783 | 1.093486  | -0.075895 |
| 6  | -0.214721 | -0.023210 | 0.428866  |
| 6  | -0.915368 | -1.188052 | 1.062605  |
| 6  | -2.127326 | -0.633677 | 1.895362  |
| 6  | -1.313599 | -2.184298 | -0.034034 |
| 1  | -0.433669 | -2.465729 | -0.619153 |
| 1  | -1.722651 | -3.083246 | 0.429144  |
| 1  | -2.069630 | -1.769027 | -0.705078 |
| 6  | -3.050215 | -1.751836 | 2.391613  |
| 1  | -3.738805 | -1.351325 | 3.138199  |
| 1  | -2.461689 | -2.550013 | 2.852278  |
| 8  | -0.091571 | -1.821473 | 2.052250  |
| 1  | 0.712676  | -2.134668 | 1.620003  |
| 53 | 2.293505  | -0.351498 | -0.099720 |
| 1  | -1.663587 | -0.142931 | 2.754069  |
| 1  | -3.646963 | -2.164367 | 1.576005  |
| 16 | -3.080095 | 0.719509  | 1.088710  |
| 35 | 4.899628  | -1.049820 | -0.484406 |
| 1  | -3.752228 | -0.033283 | 0.108278  |
| 35 | -4.819045 | -1.174371 | -1.477668 |
| 6  | -0.334996 | 2.386935  | -0.736855 |
| 6  | -0.225637 | 3.587139  | 0.221753  |
| 1  | -1.258133 | 2.451285  | -1.324913 |
| 1  | 0.490622  | 2.398663  | -1.459888 |
| 6  | -0.249198 | 4.927678  | -0.518698 |
| 1  | -1.053662 | 3.538832  | 0.935392  |
| 1  | 0.699251  | 3.497555  | 0.801640  |
| 6  | -0.145917 | 6.130088  | 0.424063  |
| 1  | 0.574776  | 4.958821  | -1.242342 |
| 1  | -1.173799 | 5.000685  | -1.103746 |
| 1  | -0.166797 | 7.073464  | -0.129290 |
| 1  | -0.975890 | 6.143572  | 1.137249  |
| 1  | 0.784639  | 6.101926  | 0.999855  |

33

Bu-Br RCS=3.2

|    |           |           |           |
|----|-----------|-----------|-----------|
| 6  | -0.220397 | 1.132755  | -0.132986 |
| 6  | -0.294282 | 0.043685  | 0.418218  |
| 6  | -1.028856 | -1.087454 | 1.063173  |
| 6  | -2.229650 | -0.494389 | 1.892728  |
| 6  | -1.455306 | -2.087034 | -0.017575 |
| 1  | -0.585052 | -2.400867 | -0.601557 |
| 1  | -1.887885 | -2.966588 | 0.460373  |
| 1  | -2.203179 | -1.660666 | -0.690957 |
| 6  | -3.168422 | -1.591670 | 2.403484  |
| 1  | -3.843321 | -1.168416 | 3.149895  |
| 1  | -2.595260 | -2.399528 | 2.868182  |
| 8  | -0.217613 | -1.728796 | 2.062787  |
| 1  | 0.567745  | -2.084607 | 1.629532  |
| 53 | 2.299321  | -0.417684 | -0.111441 |
| 1  | -1.750123 | -0.004760 | 2.743330  |
| 1  | -3.779195 | -1.996954 | 1.594495  |
| 16 | -3.168947 | 0.871559  | 1.082671  |
| 35 | 4.828470  | -1.272710 | -0.441790 |
| 1  | -3.858939 | 0.119319  | 0.126767  |
| 35 | -4.943577 | -1.095867 | -1.454516 |
| 6  | -0.125475 | 2.424538  | -0.790660 |
| 6  | 0.125377  | 3.603162  | 0.169404  |
| 1  | -1.072967 | 2.567544  | -1.325562 |
| 1  | 0.655588  | 2.384103  | -1.558017 |
| 6  | 0.159337  | 4.949474  | -0.560197 |
| 1  | -0.661128 | 3.611007  | 0.930387  |

### S13

|   |           |          |           |
|---|-----------|----------|-----------|
| 1 | 1.072980  | 3.440136 | 0.694297  |
| 6 | 0.403831  | 6.132073 | 0.382583  |
| 1 | 0.941290  | 4.927584 | -1.329341 |
| 1 | -0.788820 | 5.096172 | -1.090973 |
| 1 | 0.422233  | 7.079628 | -0.163852 |
| 1 | -0.382511 | 6.199276 | 1.140810  |
| 1 | 1.360335  | 6.029660 | 0.905228  |

33

Bu-Br RCS=3.4

|    |           |           |           |
|----|-----------|-----------|-----------|
| 6  | 0.028976  | 1.233143  | -0.146672 |
| 6  | -0.490462 | 0.289412  | 0.421241  |
| 6  | -1.343148 | -0.724598 | 1.088345  |
| 6  | -2.490634 | 0.043302  | 1.823965  |
| 6  | -1.835296 | -1.753116 | 0.063013  |
| 1  | -0.984653 | -2.187296 | -0.470378 |
| 1  | -2.366470 | -2.551208 | 0.582652  |
| 1  | -2.522284 | -1.308686 | -0.660997 |
| 6  | -3.555219 | -0.890258 | 2.402369  |
| 1  | -4.208416 | -0.320788 | 3.067040  |
| 1  | -3.085322 | -1.693531 | 2.977460  |
| 8  | -0.610387 | -1.369167 | 2.149606  |
| 1  | 0.105630  | -1.880630 | 1.753900  |
| 53 | 2.187542  | -0.627337 | -0.104354 |
| 1  | -1.989210 | 0.571014  | 2.638921  |
| 1  | -4.177264 | -1.319167 | 1.614208  |
| 16 | -3.228822 | 1.399387  | 0.812031  |
| 35 | 4.512871  | -1.912657 | -0.365579 |
| 1  | -4.031422 | 0.611952  | -0.012887 |
| 35 | -5.320059 | -0.757564 | -1.347363 |
| 6  | 0.439648  | 2.465510  | -0.812382 |
| 6  | 1.296347  | 3.399662  | 0.062271  |
| 1  | -0.487273 | 2.974278  | -1.106389 |
| 1  | 0.972533  | 2.223484  | -1.738393 |
| 6  | 1.674085  | 4.694187  | -0.664292 |
| 1  | 0.741772  | 3.634087  | 0.976871  |
| 1  | 2.203360  | 2.869998  | 0.371712  |
| 6  | 2.522307  | 5.635211  | 0.196153  |
| 1  | 2.220547  | 4.447579  | -1.582859 |
| 1  | 0.760747  | 5.212032  | -0.981190 |
| 1  | 2.778210  | 6.549852  | -0.346600 |
| 1  | 1.988270  | 5.926409  | 1.106119  |
| 1  | 3.457718  | 5.155651  | 0.501140  |

33

Bu-Br RCS=3.6

|    |           |           |           |
|----|-----------|-----------|-----------|
| 6  | 0.149509  | 1.281075  | -0.203960 |
| 6  | -0.515170 | 0.435601  | 0.369431  |
| 6  | -1.394986 | -0.543059 | 1.054935  |
| 6  | -2.542011 | 0.245043  | 1.766922  |
| 6  | -1.888954 | -1.597449 | 0.056804  |
| 1  | -1.038654 | -2.056978 | -0.455471 |
| 1  | -2.435302 | -2.373013 | 0.594112  |
| 1  | -2.564411 | -1.168350 | -0.686162 |
| 6  | -3.579174 | -0.674399 | 2.414484  |
| 1  | -4.230598 | -0.079489 | 3.058384  |
| 1  | -3.085806 | -1.437253 | 3.023460  |
| 8  | -0.668880 | -1.163729 | 2.137236  |
| 1  | 0.032553  | -1.706827 | 1.757835  |
| 53 | 2.190468  | -0.666185 | -0.103959 |
| 1  | -2.038330 | 0.825983  | 2.543515  |
| 1  | -4.208121 | -1.154934 | 1.662342  |
| 16 | -3.327471 | 1.528027  | 0.695830  |
| 35 | 4.430773  | -2.086747 | -0.296292 |
| 1  | -4.135505 | 0.680453  | -0.060420 |
| 35 | -5.448464 | -0.786536 | -1.269051 |
| 6  | 0.665140  | 2.470329  | -0.882941 |
| 6  | 1.543267  | 3.369424  | 0.006931  |
| 1  | -0.211466 | 3.031624  | -1.229771 |
| 1  | 1.221937  | 2.172285  | -1.777711 |
| 6  | 2.036149  | 4.617881  | -0.731279 |

S14

|   |          |          |           |
|---|----------|----------|-----------|
| 1 | 0.967005 | 3.662612 | 0.890750  |
| 1 | 2.399497 | 2.790570 | 0.368513  |
| 6 | 2.905323 | 5.524773 | 0.144804  |
| 1 | 2.605109 | 4.312932 | -1.618125 |
| 1 | 1.173375 | 5.184984 | -1.101297 |
| 1 | 3.243810 | 6.406776 | -0.406693 |
| 1 | 2.352075 | 5.873050 | 1.022674  |
| 1 | 3.793245 | 4.994381 | 0.502922  |

33

Bu-Br RCS=3.8

|    |           |           |           |
|----|-----------|-----------|-----------|
| 6  | 0.273595  | 1.358222  | -0.273919 |
| 6  | -0.494532 | 0.600770  | 0.295438  |
| 6  | -1.428596 | -0.319182 | 0.993782  |
| 6  | -2.575957 | 0.510446  | 1.660749  |
| 6  | -1.927889 | -1.400309 | 0.027616  |
| 1  | -1.079252 | -1.912213 | -0.435420 |
| 1  | -2.522644 | -2.130157 | 0.576705  |
| 1  | -2.561631 | -0.981012 | -0.755266 |
| 6  | -3.577527 | -0.373718 | 2.408834  |
| 1  | -4.227628 | 0.261868  | 3.014023  |
| 1  | -3.055502 | -1.072564 | 3.067582  |
| 8  | -0.733930 | -0.914670 | 2.112443  |
| 1  | -0.049320 | -1.499334 | 1.765599  |
| 53 | 2.181578  | -0.718717 | -0.098602 |
| 1  | -2.070185 | 1.165099  | 2.374962  |
| 1  | -4.213426 | -0.927299 | 1.714985  |
| 16 | -3.430163 | 1.679544  | 0.512803  |
| 35 | 4.316717  | -2.282574 | -0.212283 |
| 1  | -4.247341 | 0.752812  | -0.130322 |
| 35 | -5.583254 | -0.844860 | -1.149509 |
| 6  | 0.911280  | 2.485628  | -0.958951 |
| 6  | 1.816552  | 3.337679  | -0.049963 |
| 1  | 0.101645  | 3.105590  | -1.363091 |
| 1  | 1.484518  | 2.120300  | -1.817539 |
| 6  | 2.443072  | 4.521211  | -0.793768 |
| 1  | 1.225423  | 3.700917  | 0.797329  |
| 1  | 2.605151  | 2.703142  | 0.367584  |
| 6  | 3.340061  | 5.381208  | 0.101385  |
| 1  | 3.027012  | 4.146499  | -1.643347 |
| 1  | 1.647541  | 5.144289  | -1.220336 |
| 1  | 3.774416  | 6.217258  | -0.454469 |
| 1  | 2.775797  | 5.797428  | 0.941856  |
| 1  | 4.164268  | 4.792510  | 0.516161  |

33

Bu-Br RCS=4.0

|    |           |           |           |
|----|-----------|-----------|-----------|
| 6  | 0.416962  | 1.446890  | -0.352527 |
| 6  | -0.441940 | 0.771699  | 0.191678  |
| 6  | -1.450584 | -0.074830 | 0.883483  |
| 6  | -2.595679 | 0.815607  | 1.482827  |
| 6  | -1.957835 | -1.173078 | -0.058192 |
| 1  | -1.118416 | -1.770603 | -0.425881 |
| 1  | -2.652064 | -1.823204 | 0.473101  |
| 1  | -2.491520 | -0.750738 | -0.909464 |
| 6  | -3.563036 | 0.005086  | 2.352909  |
| 1  | -4.216077 | 0.697637  | 2.888368  |
| 1  | -3.016049 | -0.599973 | 3.079169  |
| 8  | -0.813540 | -0.651584 | 2.046343  |
| 1  | -0.143315 | -1.275691 | 1.742991  |
| 53 | 2.164871  | -0.776617 | -0.095300 |
| 1  | -2.087411 | 1.554780  | 2.107191  |
| 1  | -4.201001 | -0.638520 | 1.743600  |
| 16 | -3.519760 | 1.831305  | 0.242823  |
| 35 | 4.174574  | -2.487966 | -0.116362 |
| 1  | -4.354903 | 0.825631  | -0.234650 |
| 35 | -5.726175 | -0.912332 | -0.965903 |
| 6  | 1.185464  | 2.501177  | -1.021901 |
| 6  | 2.114889  | 3.289546  | -0.080169 |
| 1  | 0.458487  | 3.182610  | -1.480199 |
| 1  | 1.768500  | 2.069781  | -1.842347 |

## S15

|   |          |          |           |
|---|----------|----------|-----------|
| 6 | 2.880644 | 4.398176 | -0.808943 |
| 1 | 1.516087 | 3.720271 | 0.729323  |
| 1 | 2.821979 | 2.597246 | 0.388313  |
| 6 | 3.802574 | 5.195712 | 0.118132  |
| 1 | 3.472278 | 3.956222 | -1.619991 |
| 1 | 2.166092 | 5.079039 | -1.287528 |
| 1 | 4.336773 | 5.978806 | -0.427742 |
| 1 | 3.234741 | 5.677166 | 0.920487  |
| 1 | 4.549417 | 4.546541 | 0.585749  |

33

Bu-Br RCS=4.2

|    |           |           |           |
|----|-----------|-----------|-----------|
| 6  | 0.578362  | 1.537763  | -0.436856 |
| 6  | -0.363180 | 0.938888  | 0.058861  |
| 6  | -1.463316 | 0.183979  | 0.721412  |
| 6  | -2.598507 | 1.161308  | 1.211997  |
| 6  | -1.977724 | -0.929269 | -0.198247 |
| 1  | -1.175043 | -1.642551 | -0.408414 |
| 1  | -2.814167 | -1.450733 | 0.266842  |
| 1  | -2.335038 | -0.517546 | -1.141464 |
| 6  | -3.531288 | 0.494907  | 2.231557  |
| 1  | -4.206453 | 1.255136  | 2.630089  |
| 1  | -2.962397 | 0.055517  | 3.052285  |
| 8  | -0.917616 | -0.368757 | 1.940452  |
| 1  | -0.277621 | -1.048924 | 1.698957  |
| 53 | 2.127706  | -0.836758 | -0.099407 |
| 1  | -2.085629 | 1.997000  | 1.694640  |
| 1  | -4.149918 | -0.273212 | 1.762608  |
| 16 | -3.590097 | 1.955881  | -0.138317 |
| 35 | 3.993475  | -2.691518 | -0.018994 |
| 1  | -4.437857 | 0.883248  | -0.388483 |
| 35 | -5.828482 | -0.989807 | -0.707023 |
| 6  | 1.479760  | 2.512914  | -1.059687 |
| 6  | 2.418021  | 3.219242  | -0.063016 |
| 1  | 0.850835  | 3.256078  | -1.564681 |
| 1  | 2.070696  | 2.024101  | -1.841339 |
| 6  | 3.327837  | 4.246307  | -0.744224 |
| 1  | 1.812875  | 3.709752  | 0.706811  |
| 1  | 3.026698  | 2.467806  | 0.450261  |
| 6  | 4.260564  | 4.961641  | 0.237463  |
| 1  | 3.925056  | 3.745017  | -1.515692 |
| 1  | 2.711336  | 4.987178  | -1.268087 |
| 1  | 4.898417  | 5.687509  | -0.275180 |
| 1  | 3.691363  | 5.499777  | 1.001931  |
| 1  | 4.912979  | 4.249316  | 0.751954  |

33

Bu-Br RCS=4.4

|    |           |           |           |
|----|-----------|-----------|-----------|
| 6  | 0.713396  | 1.601515  | -0.505797 |
| 6  | -0.295545 | 1.069514  | -0.067427 |
| 6  | -1.469557 | 0.395532  | 0.559499  |
| 6  | -2.597919 | 1.443706  | 0.932790  |
| 6  | -1.980337 | -0.745324 | -0.327797 |
| 1  | -1.214887 | -1.522387 | -0.416019 |
| 1  | -2.892718 | -1.176148 | 0.088614  |
| 1  | -2.218722 | -0.377835 | -1.325375 |
| 6  | -3.484185 | 0.944844  | 2.082778  |
| 1  | -4.187135 | 1.739021  | 2.342468  |
| 1  | -2.886839 | 0.691594  | 2.959175  |
| 8  | -1.007576 | -0.116356 | 1.829700  |
| 1  | -0.413814 | -0.855227 | 1.651406  |
| 53 | 2.083908  | -0.874368 | -0.112879 |
| 1  | -2.083788 | 2.353195  | 1.252944  |
| 1  | -4.072634 | 0.075442  | 1.781797  |
| 16 | -3.667855 | 2.006428  | -0.479476 |
| 35 | 3.820508  | -2.838879 | 0.048036  |
| 1  | -4.500126 | 0.895671  | -0.516883 |
| 35 | -5.846893 | -1.054812 | -0.459785 |
| 6  | 1.717745  | 2.511772  | -1.067491 |
| 6  | 2.646957  | 3.139785  | -0.011474 |
| 1  | 1.176999  | 3.303593  | -1.599979 |

## S16

|   |          |          |           |
|---|----------|----------|-----------|
| 1 | 2.315295 | 1.985580 | -1.819265 |
| 6 | 3.668876 | 4.099656 | -0.628586 |
| 1 | 2.036804 | 3.669350 | 0.727948  |
| 1 | 3.166983 | 2.341493 | 0.527707  |
| 6 | 4.594911 | 4.735629 | 0.412330  |
| 1 | 4.270020 | 3.559830 | -1.370417 |
| 1 | 3.140984 | 4.888684 | -1.178381 |
| 1 | 5.313728 | 5.414799 | -0.055165 |
| 1 | 4.024913 | 5.309791 | 1.149506  |
| 1 | 5.161518 | 3.972463 | 0.954770  |

33

Bu-Br RCS=4.6

|    |           |           |           |
|----|-----------|-----------|-----------|
| 6  | 0.814127  | 1.643687  | -0.565688 |
| 6  | -0.243527 | 1.154727  | -0.195125 |
| 6  | -1.480516 | 0.538756  | 0.372246  |
| 6  | -2.599201 | 1.646077  | 0.636975  |
| 6  | -1.974699 | -0.616509 | -0.504747 |
| 1  | -1.225333 | -1.414131 | -0.528449 |
| 1  | -2.917686 | -1.010975 | -0.116906 |
| 1  | -2.151599 | -0.276449 | -1.524534 |
| 6  | -3.412876 | 1.344569  | 1.904038  |
| 1  | -4.123204 | 2.159883  | 2.054865  |
| 1  | -2.768054 | 1.260338  | 2.779371  |
| 8  | -1.107415 | 0.047093  | 1.678131  |
| 1  | -0.609327 | -0.768672 | 1.551826  |
| 53 | 2.052153  | -0.895116 | -0.132300 |
| 1  | -2.079774 | 2.597682  | 0.771339  |
| 1  | -3.986976 | 0.422417  | 1.792458  |
| 16 | -3.768497 | 1.984228  | -0.774464 |
| 35 | 3.697893  | -2.927001 | 0.088927  |
| 1  | -4.566898 | 0.861374  | -0.605109 |
| 35 | -5.813916 | -1.113631 | -0.199034 |
| 6  | 1.893125  | 2.512148  | -1.050701 |
| 6  | 2.782897  | 3.080993  | 0.070976  |
| 1  | 1.426329  | 3.336671  | -1.603235 |
| 1  | 2.511588  | 1.967513  | -1.771776 |
| 6  | 3.884559  | 4.000043  | -0.466047 |
| 1  | 2.153128  | 3.628220  | 0.780468  |
| 1  | 3.230846  | 2.251546  | 0.627394  |
| 6  | 4.772894  | 4.576530  | 0.640278  |
| 1  | 4.504750  | 3.442787  | -1.178741 |
| 1  | 3.429082  | 4.821015  | -1.033677 |
| 1  | 5.550185  | 5.227274  | 0.229337  |
| 1  | 4.185710  | 5.166599  | 1.350917  |
| 1  | 5.268527  | 3.779638  | 1.203241  |

33

Bu-Br RCS=4.8

|    |           |           |           |
|----|-----------|-----------|-----------|
| 6  | 0.585092  | 1.658758  | -0.654043 |
| 6  | -0.344063 | 0.899352  | -0.463102 |
| 6  | -1.699909 | 0.316923  | -0.431559 |
| 6  | -2.600579 | 1.635995  | -0.480151 |
| 6  | -1.876716 | -0.614814 | -1.643490 |
| 1  | -1.119578 | -1.399840 | -1.592858 |
| 1  | -2.864652 | -1.073344 | -1.601055 |
| 1  | -1.779911 | -0.072453 | -2.586258 |
| 6  | -2.831554 | 2.207197  | 0.920907  |
| 1  | -3.301584 | 3.190210  | 0.841278  |
| 1  | -1.885437 | 2.305475  | 1.462205  |
| 8  | -1.849950 | -0.395690 | 0.774876  |
| 1  | -2.762328 | -0.775365 | 0.815292  |
| 53 | 1.974371  | -0.857461 | -0.172721 |
| 1  | -2.050539 | 2.367406  | -1.075687 |
| 1  | -3.484711 | 1.553798  | 1.500076  |
| 16 | -4.147343 | 1.483555  | -1.437223 |
| 35 | 3.842703  | -2.697685 | 0.085477  |
| 1  | -4.725031 | 0.508637  | -0.658423 |
| 35 | -5.002851 | -1.388969 | 0.862790  |
| 6  | 1.619298  | 2.673208  | -0.849674 |
| 6  | 2.246290  | 3.183968  | 0.462074  |



## S17

|   |          |          |           |
|---|----------|----------|-----------|
| 1 | 1.162371 | 3.513874 | -1.388738 |
| 1 | 2.402720 | 2.277013 | -1.505347 |
| 6 | 3.313700 | 4.256088 | 0.222839  |
| 1 | 1.453114 | 3.582676 | 1.103282  |
| 1 | 2.684043 | 2.336217 | 0.998077  |
| 6 | 3.941152 | 4.772742 | 1.520919  |
| 1 | 4.099114 | 3.846333 | -0.423981 |
| 1 | 2.870604 | 5.095504 | -0.327805 |
| 1 | 4.699936 | 5.535112 | 1.321582  |
| 1 | 3.184951 | 5.217896 | 2.175104  |
| 1 | 4.421241 | 3.961334 | 2.076353  |

33

Bu-Br RCS=5.0

|    |           |           |           |
|----|-----------|-----------|-----------|
| 6  | 0.638003  | 1.706108  | -0.691906 |
| 6  | -0.353167 | 1.014504  | -0.566694 |
| 6  | -1.706658 | 0.417838  | -0.540126 |
| 6  | -2.652450 | 1.687253  | -0.695690 |
| 6  | -1.842878 | -0.590116 | -1.695121 |
| 1  | -1.065240 | -1.349676 | -1.597639 |
| 1  | -2.818160 | -1.072466 | -1.636350 |
| 1  | -1.753193 | -0.098425 | -2.666903 |
| 6  | -2.784714 | 2.451209  | 0.624474  |
| 1  | -3.315134 | 3.390689  | 0.454345  |
| 1  | -1.800633 | 2.670196  | 1.051324  |
| 8  | -1.855384 | -0.215757 | 0.711240  |
| 1  | -2.750012 | -0.633645 | 0.778460  |
| 53 | 1.948870  | -0.853179 | -0.206838 |
| 1  | -2.184973 | 2.333750  | -1.443276 |
| 1  | -3.343296 | 1.862589  | 1.352591  |
| 16 | -4.290477 | 1.349371  | -1.455334 |
| 35 | 3.758814  | -2.736876 | 0.075379  |
| 1  | -4.722124 | 0.419550  | -0.534629 |
| 35 | -4.917206 | -1.398104 | 1.029185  |
| 6  | 1.724975  | 2.677091  | -0.822975 |
| 6  | 2.308153  | 3.141346  | 0.525713  |
| 1  | 1.333568  | 3.544563  | -1.370299 |
| 1  | 2.522383  | 2.254549  | -1.444173 |
| 6  | 3.431058  | 4.169100  | 0.355600  |
| 1  | 1.502511  | 3.565335  | 1.134332  |
| 1  | 2.682402  | 2.268162  | 1.068873  |
| 6  | 4.016915  | 4.638695  | 1.690489  |
| 1  | 4.228428  | 3.734860  | -0.259904 |
| 1  | 3.051595  | 5.035099  | -0.201442 |
| 1  | 4.816055  | 5.370545  | 1.540378  |
| 1  | 3.249743  | 5.106025  | 2.315793  |
| 1  | 4.434954  | 3.799041  | 2.254040  |

33

Bu-Br RCS=5.2

|    |           |           |           |
|----|-----------|-----------|-----------|
| 6  | 0.711138  | 1.778826  | -0.732349 |
| 6  | -0.354876 | 1.195707  | -0.665032 |
| 6  | -1.716461 | 0.596547  | -0.626554 |
| 6  | -2.722140 | 1.816855  | -0.769008 |
| 6  | -1.854899 | -0.416769 | -1.777803 |
| 1  | -1.059905 | -1.160321 | -1.703397 |
| 1  | -2.817882 | -0.920202 | -1.698189 |
| 1  | -1.798304 | 0.079604  | -2.750273 |
| 6  | -2.751764 | 2.668167  | 0.502835  |
| 1  | -3.359012 | 3.560621  | 0.338345  |
| 1  | -1.741206 | 2.975764  | 0.792407  |
| 8  | -1.820124 | -0.033604 | 0.633097  |
| 1  | -2.679694 | -0.517878 | 0.717153  |
| 53 | 1.882366  | -0.858188 | -0.245907 |
| 1  | -2.362741 | 2.422793  | -1.606233 |
| 1  | -3.180678 | 2.102060  | 1.329989  |
| 16 | -4.439945 | 1.369920  | -1.314705 |
| 35 | 3.598178  | -2.814389 | 0.045719  |
| 1  | -4.698323 | 0.412212  | -0.356491 |
| 35 | -4.739184 | -1.479442 | 1.103952  |
| 6  | 1.871178  | 2.670129  | -0.808377 |

## S18

|   |          |          |           |
|---|----------|----------|-----------|
| 6 | 2.413952 | 3.095097 | 0.569771  |
| 1 | 1.573011 | 3.561459 | -1.375115 |
| 1 | 2.668367 | 2.188933 | -1.385296 |
| 6 | 3.617866 | 4.035817 | 0.461056  |
| 1 | 1.610494 | 3.579979 | 1.134274  |
| 1 | 2.692372 | 2.198840 | 1.132568  |
| 6 | 4.163697 | 4.466287 | 1.825804  |
| 1 | 4.412931 | 3.540782 | -0.109924 |
| 1 | 3.334973 | 4.925316 | -0.116103 |
| 1 | 5.022413 | 5.135722 | 1.719469  |
| 1 | 3.400709 | 4.992299 | 2.408177  |
| 1 | 4.486285 | 3.600197 | 2.411628  |

33

Bu-Br RCS=5.4

|    |           |           |           |
|----|-----------|-----------|-----------|
| 6  | 0.826950  | 1.925526  | -0.797099 |
| 6  | -0.320145 | 1.518168  | -0.720923 |
| 6  | -1.713750 | 0.956265  | -0.650273 |
| 6  | -2.750361 | 2.145421  | -0.458375 |
| 6  | -1.983277 | 0.169763  | -1.947435 |
| 1  | -1.195592 | -0.570526 | -2.097391 |
| 1  | -2.939835 | -0.345910 | -1.864224 |
| 1  | -2.017944 | 0.839961  | -2.810863 |
| 6  | -2.574362 | 2.817253  | 0.904636  |
| 1  | -3.226746 | 3.689266  | 0.981613  |
| 1  | -1.536575 | 3.138712  | 1.048445  |
| 8  | -1.689104 | 0.103471  | 0.479149  |
| 1  | -2.509826 | -0.449175 | 0.530415  |
| 53 | 1.677596  | -0.919945 | -0.234026 |
| 1  | -2.550208 | 2.869965  | -1.253709 |
| 1  | -2.825533 | 2.121561  | 1.705795  |
| 16 | -4.569259 | 1.727951  | -0.753668 |
| 35 | 3.261504  | -2.965056 | 0.024115  |
| 1  | -4.623974 | 0.559268  | -0.023844 |
| 35 | -4.440827 | -1.650894 | 0.873641  |
| 6  | 2.118663  | 2.609138  | -0.886245 |
| 6  | 2.694684  | 3.019693  | 0.482780  |
| 1  | 1.990153  | 3.501104  | -1.512495 |
| 1  | 2.836873  | 1.966470  | -1.407310 |
| 6  | 4.044618  | 3.733337  | 0.361825  |
| 1  | 1.973708  | 3.668030  | 0.992303  |
| 1  | 2.801589  | 2.125013  | 1.103967  |
| 6  | 4.624243  | 4.149401  | 1.717086  |
| 1  | 4.755920  | 3.075440  | -0.152284 |
| 1  | 3.932668  | 4.620048  | -0.275155 |
| 1  | 5.587775  | 4.654641  | 1.601739  |
| 1  | 3.949722  | 4.833262  | 2.242012  |
| 1  | 4.778954  | 3.279423  | 2.362520  |

31

Ph-Br 1ec

|   |           |           |           |
|---|-----------|-----------|-----------|
| 6 | -0.749555 | 5.037158  | 0.602361  |
| 6 | -1.677676 | 4.252342  | -0.081886 |
| 6 | -1.546405 | 2.867709  | -0.116835 |
| 6 | -0.467959 | 2.259593  | 0.554447  |
| 6 | 0.461509  | 3.051059  | 1.250043  |
| 6 | 0.319746  | 4.433544  | 1.266865  |
| 1 | -0.857717 | 6.116515  | 0.619975  |
| 1 | -2.514671 | 4.714169  | -0.593440 |
| 1 | -2.277999 | 2.246680  | -0.631022 |
| 1 | 1.291366  | 2.577440  | 1.760398  |
| 1 | 1.043584  | 5.040873  | 1.799206  |
| 6 | -0.385114 | 0.835776  | 0.528458  |
| 6 | -0.474410 | -0.381547 | 0.470807  |
| 6 | -1.007704 | -1.769728 | 0.362353  |
| 6 | -2.392574 | -1.731775 | 1.091629  |
| 6 | -1.119186 | -2.118147 | -1.128566 |
| 1 | -0.142960 | -2.013697 | -1.610917 |
| 1 | -1.462863 | -3.148227 | -1.221870 |
| 1 | -1.835164 | -1.451855 | -1.617569 |
| 6 | -2.249815 | -1.611608 | 2.609516  |

## S19

|           |           |           |           |
|-----------|-----------|-----------|-----------|
| 1         | -3.230579 | -1.435945 | 3.054518  |
| 1         | -1.595985 | -0.774217 | 2.869640  |
| 8         | -0.180618 | -2.708718 | 1.056585  |
| 1         | 0.672455  | -2.745063 | 0.608072  |
| 53        | 2.297336  | -0.230034 | -0.073592 |
| 1         | -2.931905 | -0.873832 | 0.682575  |
| 1         | -1.822797 | -2.517686 | 3.043710  |
| 16        | -3.487660 | -3.168042 | 0.678189  |
| 35        | 4.870756  | -0.620407 | -0.585363 |
| 1         | -4.183688 | -2.489764 | -0.267010 |
| 35        | -4.211542 | 0.350651  | -1.367630 |
| 31        |           |           |           |
| Ph-Br 1ts |           |           |           |
| 6         | -0.652373 | 4.897159  | 1.120492  |
| 6         | -1.457452 | 4.238487  | 0.191732  |
| 6         | -1.402042 | 2.854099  | 0.060429  |
| 6         | -0.527466 | 2.118562  | 0.880774  |
| 6         | 0.278055  | 2.783624  | 1.822422  |
| 6         | 0.215515  | 4.166783  | 1.935597  |
| 1         | -0.700258 | 5.977163  | 1.212988  |
| 1         | -2.138817 | 4.800060  | -0.437592 |
| 1         | -2.042032 | 2.326701  | -0.645192 |
| 1         | 0.951304  | 2.210177  | 2.448461  |
| 1         | 0.842566  | 4.676344  | 2.659045  |
| 6         | -0.499905 | 0.697878  | 0.759957  |
| 6         | -0.581043 | -0.514780 | 0.644217  |
| 6         | -1.003412 | -1.937219 | 0.591674  |
| 6         | -2.371199 | -2.035216 | 1.418431  |
| 6         | -1.098717 | -2.394003 | -0.868975 |
| 1         | -0.102813 | -2.360080 | -1.320529 |
| 1         | -1.477326 | -3.415961 | -0.904087 |
| 1         | -1.762173 | -1.745259 | -1.443455 |
| 6         | -2.314896 | -3.081474 | 2.538727  |
| 1         | -3.252119 | -3.047030 | 3.098821  |
| 1         | -1.485674 | -2.883217 | 3.218117  |
| 8         | -0.040014 | -2.748103 | 1.292800  |
| 1         | 0.809627  | -2.638939 | 0.847675  |
| 53        | 2.179813  | -0.233125 | -0.102391 |
| 1         | -2.536440 | -1.060175 | 1.874366  |
| 1         | -2.187188 | -4.089724 | 2.139229  |
| 16        | -3.888817 | -2.388838 | 0.426380  |
| 35        | 4.729063  | -0.513325 | -0.765375 |
| 1         | -3.890479 | -1.248553 | -0.351630 |
| 35        | -3.744134 | 0.636095  | -1.826249 |
| 31        |           |           |           |
| Ph-Br 1r  |           |           |           |
| 6         | -0.398706 | 4.759820  | 0.286415  |
| 6         | 0.125609  | 3.891012  | -0.669222 |
| 6         | -0.032188 | 2.514846  | -0.532883 |
| 6         | -0.713534 | 1.977997  | 0.569521  |
| 6         | -1.248241 | 2.864016  | 1.518625  |
| 6         | -1.087749 | 4.239638  | 1.381141  |
| 1         | -0.271963 | 5.831686  | 0.178929  |
| 1         | 0.662174  | 4.282949  | -1.526167 |
| 1         | 0.376832  | 1.849265  | -1.281113 |
| 1         | -1.782149 | 2.466221  | 2.373742  |
| 1         | -1.499117 | 4.905433  | 2.132441  |
| 6         | -0.880117 | 0.519108  | 0.725225  |
| 6         | -0.022590 | -0.493759 | 0.537092  |
| 6         | -0.614153 | -1.898203 | 0.690723  |
| 6         | -1.839508 | -1.735616 | 1.628887  |
| 6         | -0.959269 | -2.465372 | -0.695414 |
| 1         | -0.059254 | -2.479651 | -1.313213 |
| 1         | -1.326557 | -3.489762 | -0.600404 |
| 1         | -1.713724 | -1.858647 | -1.202322 |
| 6         | -2.899508 | -2.828341 | 1.583413  |
| 1         | -3.670666 | -2.652370 | 2.338449  |
| 1         | -2.430234 | -3.791728 | 1.800860  |
| 8         | 0.251433  | -2.808135 | 1.375325  |

S20

|    |           |           |           |
|----|-----------|-----------|-----------|
| 1  | 1.159327  | -2.628696 | 1.085026  |
| 53 | 2.091487  | -0.367685 | 0.016449  |
| 1  | -1.426432 | -1.666678 | 2.637380  |
| 1  | -3.387542 | -2.890807 | 0.609153  |
| 16 | -2.522507 | -0.055862 | 1.268703  |
| 35 | 5.112261  | -0.326732 | -0.721151 |
| 1  | -3.823260 | -0.233090 | -0.494440 |
| 35 | -4.823343 | -0.326662 | -1.594653 |

31

Ph-Br RCS=1.8

|    |           |           |           |
|----|-----------|-----------|-----------|
| 6  | -0.385937 | 4.750289  | 0.289928  |
| 6  | 0.121706  | 3.880111  | -0.673424 |
| 6  | -0.042138 | 2.504608  | -0.537089 |
| 6  | -0.712886 | 1.969992  | 0.572589  |
| 6  | -1.231023 | 2.857308  | 1.529480  |
| 6  | -1.064356 | 4.232308  | 1.392265  |
| 1  | -0.254300 | 5.821582  | 0.182615  |
| 1  | 0.650105  | 4.270430  | -1.536157 |
| 1  | 0.354011  | 1.837752  | -1.291140 |
| 1  | -1.756421 | 2.461319  | 2.390733  |
| 1  | -1.462354 | 4.899212  | 2.149762  |
| 6  | -0.886969 | 0.510361  | 0.727916  |
| 6  | -0.024102 | -0.499292 | 0.535937  |
| 6  | -0.614878 | -1.904208 | 0.688253  |
| 6  | -1.841284 | -1.739206 | 1.624205  |
| 6  | -0.958716 | -2.471673 | -0.698047 |
| 1  | -0.057854 | -2.486952 | -1.314566 |
| 1  | -1.327317 | -3.495660 | -0.603344 |
| 1  | -1.711897 | -1.864358 | -1.206308 |
| 6  | -2.908731 | -2.824075 | 1.573520  |
| 1  | -3.681697 | -2.643325 | 2.325607  |
| 1  | -2.447246 | -3.790967 | 1.792125  |
| 8  | 0.249596  | -2.814221 | 1.374119  |
| 1  | 1.158112  | -2.632866 | 1.086951  |
| 53 | 2.087704  | -0.369304 | 0.015975  |
| 1  | -1.430396 | -1.674593 | 2.633927  |
| 1  | -3.393208 | -2.882503 | 0.597252  |
| 16 | -2.510035 | -0.052659 | 1.265190  |
| 35 | 5.112086  | -0.322734 | -0.722613 |
| 1  | -3.822248 | -0.223180 | -0.494373 |
| 35 | -4.826540 | -0.313426 | -1.590215 |

31

Ph-Br RCS=2.0

|    |           |           |           |
|----|-----------|-----------|-----------|
| 6  | -0.463548 | 4.832155  | 0.244038  |
| 6  | 0.162880  | 3.974051  | -0.658325 |
| 6  | 0.042918  | 2.594507  | -0.519728 |
| 6  | -0.702738 | 2.043608  | 0.535072  |
| 6  | -1.338753 | 2.918928  | 1.430805  |
| 6  | -1.216581 | 4.297371  | 1.288851  |
| 1  | -0.367678 | 5.906864  | 0.133158  |
| 1  | 0.748935  | 4.377033  | -1.476905 |
| 1  | 0.531903  | 1.937499  | -1.226188 |
| 1  | -1.924880 | 2.507715  | 2.243959  |
| 1  | -1.709861 | 4.954851  | 1.996843  |
| 6  | -0.819258 | 0.591519  | 0.694807  |
| 6  | -0.009213 | -0.449381 | 0.538207  |
| 6  | -0.614262 | -1.847324 | 0.697355  |
| 6  | -1.833818 | -1.697601 | 1.648685  |
| 6  | -0.968199 | -2.407160 | -0.689780 |
| 1  | -0.072726 | -2.418461 | -1.314364 |
| 1  | -1.332943 | -3.432327 | -0.596094 |
| 1  | -1.726717 | -1.798896 | -1.187572 |
| 6  | -2.839848 | -2.843663 | 1.638353  |
| 1  | -3.598538 | -2.698920 | 2.412128  |
| 1  | -2.317863 | -3.781083 | 1.848749  |
| 8  | 0.252970  | -2.762500 | 1.372962  |
| 1  | 1.157500  | -2.601124 | 1.062817  |
| 53 | 2.126327  | -0.357975 | 0.018387  |
| 1  | -1.407460 | -1.598470 | 2.648843  |

S21

|    |           |           |           |
|----|-----------|-----------|-----------|
| 1  | -3.350241 | -2.935838 | 0.677890  |
| 16 | -2.613666 | -0.067215 | 1.283167  |
| 35 | 5.116827  | -0.374423 | -0.701376 |
| 1  | -3.847983 | -0.301017 | -0.473699 |
| 35 | -4.833380 | -0.425913 | -1.593724 |

31

Ph-Br RCS=2.2

|    |           |           |           |
|----|-----------|-----------|-----------|
| 6  | -0.476110 | 4.907659  | 0.179920  |
| 6  | 0.191681  | 4.056632  | -0.699161 |
| 6  | 0.095617  | 2.676112  | -0.553922 |
| 6  | -0.667108 | 2.119862  | 0.487591  |
| 6  | -1.343835 | 2.987280  | 1.360970  |
| 6  | -1.245831 | 4.365862  | 1.209583  |
| 1  | -0.400477 | 5.983228  | 0.062160  |
| 1  | 0.790703  | 4.465939  | -1.505120 |
| 1  | 0.618231  | 2.021810  | -1.238755 |
| 1  | -1.946625 | 2.565584  | 2.155960  |
| 1  | -1.772786 | 5.019121  | 1.896771  |
| 6  | -0.742414 | 0.677265  | 0.653707  |
| 6  | -0.002161 | -0.400163 | 0.533769  |
| 6  | -0.633181 | -1.786010 | 0.689839  |
| 6  | -1.850055 | -1.640469 | 1.650589  |
| 6  | -0.995389 | -2.328341 | -0.702122 |
| 1  | -0.101884 | -2.344113 | -1.329709 |
| 1  | -1.370183 | -3.350258 | -0.615818 |
| 1  | -1.749117 | -1.707925 | -1.190887 |
| 6  | -2.803796 | -2.833484 | 1.671129  |
| 1  | -3.548387 | -2.715633 | 2.462498  |
| 1  | -2.235703 | -3.745810 | 1.872024  |
| 8  | 0.225974  | -2.715385 | 1.356275  |
| 1  | 1.126819  | -2.584658 | 1.023102  |
| 53 | 2.166247  | -0.353503 | 0.020650  |
| 1  | -1.413356 | -1.514646 | 2.643171  |
| 1  | -3.334739 | -2.951519 | 0.724703  |
| 16 | -2.716420 | -0.058419 | 1.287795  |
| 35 | 5.113241  | -0.454267 | -0.669322 |
| 1  | -3.879892 | -0.353992 | -0.415137 |
| 35 | -4.859049 | -0.523074 | -1.558840 |

31

Ph-Br RCS=2.4

|    |           |           |           |
|----|-----------|-----------|-----------|
| 6  | -0.448190 | 4.973436  | 0.096871  |
| 6  | 0.124838  | 4.119581  | -0.844173 |
| 6  | 0.041252  | 2.740102  | -0.684451 |
| 6  | -0.610695 | 2.193024  | 0.434938  |
| 6  | -1.191801 | 3.062289  | 1.373290  |
| 6  | -1.108395 | 4.438850  | 1.204560  |
| 1  | -0.384917 | 6.048369  | -0.033061 |
| 1  | 0.638378  | 4.526287  | -1.708250 |
| 1  | 0.490764  | 2.077291  | -1.412382 |
| 1  | -1.715469 | 2.640247  | 2.222085  |
| 1  | -1.561414 | 5.097607  | 1.937442  |
| 6  | -0.657708 | 0.761906  | 0.609080  |
| 6  | -0.011956 | -0.356973 | 0.522909  |
| 6  | -0.677315 | -1.725870 | 0.660250  |
| 6  | -1.897140 | -1.577933 | 1.623881  |
| 6  | -1.043185 | -2.237575 | -0.741777 |
| 1  | -0.147910 | -2.261814 | -1.367053 |
| 1  | -1.438092 | -3.252817 | -0.671517 |
| 1  | -1.784518 | -1.596578 | -1.221707 |
| 6  | -2.814653 | -2.802126 | 1.655957  |
| 1  | -3.547532 | -2.705550 | 2.460490  |
| 1  | -2.217499 | -3.698874 | 1.842014  |
| 8  | 0.163847  | -2.678266 | 1.316973  |
| 1  | 1.060267  | -2.586080 | 0.961502  |
| 53 | 2.202082  | -0.354482 | 0.025628  |
| 1  | -1.455051 | -1.441578 | 2.612756  |
| 1  | -3.360857 | -2.928894 | 0.719566  |
| 16 | -2.821877 | -0.026595 | 1.283350  |
| 35 | 5.093612  | -0.552536 | -0.621615 |

S22

|    |           |           |           |
|----|-----------|-----------|-----------|
| 1  | -3.874601 | -0.371290 | -0.293918 |
| 35 | -4.859411 | -0.602875 | -1.491060 |

31  
Ph-Br RCS=2.6

|    |           |           |           |
|----|-----------|-----------|-----------|
| 6  | -1.439925 | 4.750422  | 0.391261  |
| 6  | -2.004849 | 3.861778  | -0.525412 |
| 6  | -1.766324 | 2.497298  | -0.419805 |
| 6  | -0.956245 | 2.011909  | 0.624714  |
| 6  | -0.404266 | 2.909265  | 1.556750  |
| 6  | -0.638825 | 4.272789  | 1.429814  |
| 1  | -1.626102 | 5.815066  | 0.298583  |
| 1  | -2.635964 | 4.230921  | -1.325658 |
| 1  | -2.221819 | 1.795976  | -1.112120 |
| 1  | 0.215486  | 2.526193  | 2.358184  |
| 1  | -0.199344 | 4.963356  | 2.140880  |
| 6  | -0.695262 | 0.614932  | 0.726899  |
| 6  | -0.057549 | -0.472865 | 0.614380  |
| 6  | -0.525901 | -1.912285 | 0.719146  |
| 6  | -1.764919 | -1.979624 | 1.677297  |
| 6  | -0.809260 | -2.429217 | -0.699007 |
| 1  | 0.082666  | -2.308823 | -1.318220 |
| 1  | -1.052772 | -3.492116 | -0.654842 |
| 1  | -1.634587 | -1.889290 | -1.170102 |
| 6  | -2.525585 | -3.306484 | 1.591206  |
| 1  | -3.246589 | -3.378323 | 2.407953  |
| 1  | -1.822464 | -4.139359 | 1.676098  |
| 8  | 0.439768  | -2.741789 | 1.372068  |
| 1  | 1.289822  | -2.620802 | 0.926081  |
| 53 | 2.193362  | -0.160661 | -0.032374 |
| 1  | -1.345485 | -1.874091 | 2.680068  |
| 1  | -3.072184 | -3.395644 | 0.650994  |
| 16 | -2.883354 | -0.531995 | 1.537339  |
| 35 | 4.949871  | -0.108750 | -0.740730 |
| 1  | -3.385888 | -0.675279 | 0.202353  |
| 35 | -4.133984 | -0.505650 | -1.766180 |

31  
Ph-Br RCS=2.8

|    |           |           |           |
|----|-----------|-----------|-----------|
| 6  | -1.731683 | 4.671068  | 0.503335  |
| 6  | -2.198244 | 3.766760  | -0.452011 |
| 6  | -1.844919 | 2.425007  | -0.382250 |
| 6  | -1.019630 | 1.980158  | 0.670276  |
| 6  | -0.567587 | 2.892535  | 1.643032  |
| 6  | -0.915486 | 4.233093  | 1.549043  |
| 1  | -2.007543 | 5.718199  | 0.437364  |
| 1  | -2.844840 | 4.103587  | -1.254050 |
| 1  | -2.231605 | 1.706874  | -1.100207 |
| 1  | 0.061540  | 2.538149  | 2.450427  |
| 1  | -0.555701 | 4.937189  | 2.290929  |
| 6  | -0.655828 | 0.612728  | 0.739784  |
| 6  | -0.085046 | -0.496374 | 0.641266  |
| 6  | -0.491636 | -1.950871 | 0.710175  |
| 6  | -1.715415 | -2.101758 | 1.679543  |
| 6  | -0.768790 | -2.435567 | -0.720481 |
| 1  | 0.115219  | -2.271781 | -1.341470 |
| 1  | -0.980734 | -3.505866 | -0.704616 |
| 1  | -1.611207 | -1.905053 | -1.172864 |
| 6  | -2.368055 | -3.485995 | 1.591273  |
| 1  | -3.068774 | -3.617376 | 2.418024  |
| 1  | -1.603375 | -4.264870 | 1.655204  |
| 8  | 0.518065  | -2.755729 | 1.329437  |
| 1  | 1.350141  | -2.607603 | 0.859749  |
| 53 | 2.223661  | -0.088328 | -0.029166 |
| 1  | -1.292236 | -1.974723 | 2.678551  |
| 1  | -2.923829 | -3.607151 | 0.659907  |
| 16 | -2.952803 | -0.748227 | 1.583413  |
| 35 | 4.922750  | -0.005569 | -0.735265 |
| 1  | -3.364870 | -0.843534 | 0.245389  |
| 35 | -3.997664 | -0.462199 | -1.881437 |

S23

31  
Ph-Br RCS=3.0

|    |           |           |           |
|----|-----------|-----------|-----------|
| 6  | -1.766008 | 4.663122  | 0.600725  |
| 6  | -2.238947 | 3.761591  | -0.353466 |
| 6  | -1.853255 | 2.427006  | -0.313953 |
| 6  | -0.989453 | 1.988219  | 0.709896  |
| 6  | -0.529336 | 2.897287  | 1.682150  |
| 6  | -0.910239 | 4.230225  | 1.617096  |
| 1  | -2.067514 | 5.704436  | 0.557768  |
| 1  | -2.916616 | 4.093059  | -1.131758 |
| 1  | -2.245033 | 1.710007  | -1.031791 |
| 1  | 0.129417  | 2.546597  | 2.467314  |
| 1  | -0.546577 | 4.932335  | 2.359013  |
| 6  | -0.610434 | 0.625952  | 0.753234  |
| 6  | -0.154589 | -0.523372 | 0.673940  |
| 6  | -0.526759 | -1.980336 | 0.705533  |
| 6  | -1.743927 | -2.187028 | 1.674126  |
| 6  | -0.796831 | -2.434308 | -0.736576 |
| 1  | 0.086255  | -2.246741 | -1.352435 |
| 1  | -0.998218 | -3.506574 | -0.746066 |
| 1  | -1.642286 | -1.899540 | -1.179066 |
| 6  | -2.328151 | -3.601130 | 1.573369  |
| 1  | -3.019305 | -3.770182 | 2.401319  |
| 1  | -1.529817 | -4.346557 | 1.625740  |
| 8  | 0.506256  | -2.776245 | 1.302878  |
| 1  | 1.326494  | -2.615529 | 0.817971  |
| 53 | 2.236181  | -0.064774 | -0.028164 |
| 1  | -1.324226 | -2.051714 | 2.673662  |
| 1  | -2.884077 | -3.737425 | 0.644085  |
| 16 | -3.052136 | -0.895157 | 1.604304  |
| 35 | 4.885296  | -0.006793 | -0.735312 |
| 1  | -3.389044 | -0.931143 | 0.257529  |
| 35 | -3.914591 | -0.368033 | -1.964086 |

31  
Ph-Br RCS=3.2

|    |           |           |           |
|----|-----------|-----------|-----------|
| 6  | -1.538991 | 4.724739  | 0.684784  |
| 6  | -2.108176 | 3.841845  | -0.233016 |
| 6  | -1.775333 | 2.491848  | -0.213976 |
| 6  | -0.865297 | 2.020412  | 0.752448  |
| 6  | -0.304106 | 2.910499  | 1.686610  |
| 6  | -0.635890 | 4.257887  | 1.643275  |
| 1  | -1.800390 | 5.777408  | 0.658065  |
| 1  | -2.819826 | 4.198996  | -0.968580 |
| 1  | -2.236189 | 1.792080  | -0.908513 |
| 1  | 0.392055  | 2.535700  | 2.427240  |
| 1  | -0.195986 | 4.944794  | 2.357755  |
| 6  | -0.555745 | 0.637100  | 0.777050  |
| 6  | -0.280684 | -0.558404 | 0.714117  |
| 6  | -0.641576 | -2.007975 | 0.694654  |
| 6  | -1.862253 | -2.252903 | 1.649248  |
| 6  | -0.900655 | -2.420021 | -0.762251 |
| 1  | -0.010551 | -2.220384 | -1.364317 |
| 1  | -1.109618 | -3.489914 | -0.804040 |
| 1  | -1.736378 | -1.864287 | -1.198065 |
| 6  | -2.424762 | -3.672293 | 1.510496  |
| 1  | -3.119294 | -3.867320 | 2.329983  |
| 1  | -1.618842 | -4.410614 | 1.550404  |
| 8  | 0.397589  | -2.815043 | 1.274210  |
| 1  | 1.211745  | -2.653364 | 0.780393  |
| 53 | 2.234708  | -0.092833 | -0.029017 |
| 1  | -1.449615 | -2.136787 | 2.654135  |
| 1  | -2.975054 | -3.792746 | 0.575652  |
| 16 | -3.191734 | -0.976672 | 1.606084  |
| 35 | 4.837580  | -0.108559 | -0.739972 |
| 1  | -3.457414 | -0.925755 | 0.250444  |
| 35 | -3.873761 | -0.195926 | -2.006152 |

31  
Ph-Br RCS=3.4

|   |           |          |          |
|---|-----------|----------|----------|
| 6 | -1.202885 | 4.791951 | 0.754384 |
|---|-----------|----------|----------|

S24

|    |           |           |           |
|----|-----------|-----------|-----------|
| 6  | -1.889990 | 3.946869  | -0.116783 |
| 6  | -1.647561 | 2.576971  | -0.111725 |
| 6  | -0.705659 | 2.047768  | 0.790790  |
| 6  | -0.021254 | 2.899668  | 1.674821  |
| 6  | -0.267676 | 4.266444  | 1.649019  |
| 1  | -1.395285 | 5.859628  | 0.739717  |
| 1  | -2.623544 | 4.348984  | -0.806342 |
| 1  | -2.193909 | 1.909670  | -0.775892 |
| 1  | 0.701689  | 2.482282  | 2.365471  |
| 1  | 0.266152  | 4.922785  | 2.327491  |
| 6  | -0.498007 | 0.640343  | 0.799635  |
| 6  | -0.426044 | -0.578482 | 0.749391  |
| 6  | -0.788233 | -2.018173 | 0.670893  |
| 6  | -2.015092 | -2.302786 | 1.603858  |
| 6  | -1.032840 | -2.377929 | -0.802708 |
| 1  | -0.133324 | -2.166072 | -1.386510 |
| 1  | -1.252546 | -3.443246 | -0.884500 |
| 1  | -1.855423 | -1.795808 | -1.229363 |
| 6  | -2.568617 | -3.719094 | 1.413607  |
| 1  | -3.271464 | -3.941069 | 2.219218  |
| 1  | -1.761213 | -4.456701 | 1.439374  |
| 8  | 0.251462  | -2.844136 | 1.230277  |
| 1  | 1.062711  | -2.681052 | 0.732556  |
| 53 | 2.228831  | -0.142811 | -0.030195 |
| 1  | -1.612027 | -2.217695 | 2.615654  |
| 1  | -3.109540 | -3.811744 | 0.470164  |
| 16 | -3.352153 | -1.029917 | 1.589622  |
| 35 | 4.796550  | -0.253837 | -0.744244 |
| 1  | -3.548967 | -0.877233 | 0.231905  |
| 35 | -3.864992 | 0.014601  | -2.003924 |

31

Ph-Br RCS=3.6

|    |           |           |           |
|----|-----------|-----------|-----------|
| 6  | -0.940094 | 4.831528  | 0.812496  |
| 6  | -1.712443 | 4.025365  | -0.023388 |
| 6  | -1.540921 | 2.644507  | -0.031698 |
| 6  | -0.581886 | 2.064361  | 0.819188  |
| 6  | 0.191079  | 2.876859  | 1.664839  |
| 6  | 0.012049  | 4.254892  | 1.655734  |
| 1  | -1.078384 | 5.907652  | 0.809344  |
| 1  | -2.457453 | 4.466741  | -0.675761 |
| 1  | -2.149555 | 2.009050  | -0.672509 |
| 1  | 0.928880  | 2.421857  | 2.314876  |
| 1  | 0.613555  | 4.879901  | 2.306728  |
| 6  | -0.451408 | 0.643369  | 0.812071  |
| 6  | -0.539979 | -0.572871 | 0.767646  |
| 6  | -0.905389 | -2.006139 | 0.644866  |
| 6  | -2.132526 | -2.335861 | 1.560539  |
| 6  | -1.137107 | -2.324351 | -0.840692 |
| 1  | -0.230917 | -2.100146 | -1.409474 |
| 1  | -1.361294 | -3.385669 | -0.954944 |
| 1  | -1.950916 | -1.724100 | -1.258970 |
| 6  | -2.645543 | -3.763739 | 1.344285  |
| 1  | -3.351535 | -4.014137 | 2.138909  |
| 1  | -1.820166 | -4.481076 | 1.369391  |
| 8  | 0.140065  | -2.841016 | 1.186267  |
| 1  | 0.948838  | -2.669129 | 0.687514  |
| 53 | 2.226419  | -0.179961 | -0.031539 |
| 1  | -1.741526 | -2.255771 | 2.577358  |
| 1  | -3.174708 | -3.856977 | 0.394258  |
| 16 | -3.510877 | -1.103611 | 1.552147  |
| 35 | 4.771804  | -0.372941 | -0.745985 |
| 1  | -3.632296 | -0.854303 | 0.200351  |
| 35 | -3.862781 | 0.188725  | -1.985311 |

31

Ph-Br RCS=3.8

|   |           |          |          |
|---|-----------|----------|----------|
| 6 | -0.745812 | 4.853848 | 0.886565 |
| 6 | -1.560296 | 4.090368 | 0.050576 |
| 6 | -1.446222 | 2.703671 | 0.023674 |
| 6 | -0.501687 | 2.073704 | 0.854485 |



S25

|    |           |           |           |
|----|-----------|-----------|-----------|
| 6  | 0.315068  | 2.843058  | 1.698478  |
| 6  | 0.191765  | 4.227517  | 1.710106  |
| 1  | -0.839963 | 5.934674  | 0.898658  |
| 1  | -2.293721 | 4.570117  | -0.587764 |
| 1  | -2.086415 | 2.101415  | -0.618518 |
| 1  | 1.042556  | 2.350625  | 2.332712  |
| 1  | 0.826513  | 4.818549  | 2.361336  |
| 6  | -0.430887 | 0.645786  | 0.826667  |
| 6  | -0.629607 | -0.557462 | 0.776968  |
| 6  | -0.997270 | -1.987335 | 0.625935  |
| 6  | -2.224586 | -2.358789 | 1.525924  |
| 6  | -1.211900 | -2.283352 | -0.866769 |
| 1  | -0.296932 | -2.056825 | -1.420374 |
| 1  | -1.441761 | -3.341235 | -0.999751 |
| 1  | -2.014212 | -1.669507 | -1.287035 |
| 6  | -2.658786 | -3.815792 | 1.325778  |
| 1  | -3.370872 | -4.085878 | 2.108651  |
| 1  | -1.800190 | -4.490301 | 1.384073  |
| 8  | 0.055604  | -2.819666 | 1.162141  |
| 1  | 0.865211  | -2.632421 | 0.670181  |
| 53 | 2.215280  | -0.206969 | -0.032180 |
| 1  | -1.857469 | -2.243166 | 2.548010  |
| 1  | -3.161504 | -3.952535 | 0.366723  |
| 16 | -3.681401 | -1.214597 | 1.469424  |
| 35 | 4.744807  | -0.461344 | -0.748297 |
| 1  | -3.690809 | -0.854102 | 0.137986  |
| 35 | -3.814275 | 0.344188  | -1.983919 |

31

Ph-Br RCS=4.0

|    |           |           |           |
|----|-----------|-----------|-----------|
| 6  | -0.757608 | 4.814390  | 1.298895  |
| 6  | -1.415742 | 4.200666  | 0.233569  |
| 6  | -1.370845 | 2.818957  | 0.073078  |
| 6  | -0.657275 | 2.040996  | 1.001999  |
| 6  | 0.001067  | 2.660899  | 2.079446  |
| 6  | -0.048796 | 4.041777  | 2.221891  |
| 1  | -0.796502 | 5.892667  | 1.413757  |
| 1  | -1.972382 | 4.796526  | -0.481193 |
| 1  | -1.893772 | 2.323484  | -0.743857 |
| 1  | 0.550232  | 2.053297  | 2.789058  |
| 1  | 0.463284  | 4.516670  | 3.051654  |
| 6  | -0.630880 | 0.623145  | 0.853214  |
| 6  | -0.692627 | -0.587802 | 0.720292  |
| 6  | -1.034920 | -2.031979 | 0.682569  |
| 6  | -2.333180 | -2.249944 | 1.533404  |
| 6  | -1.137719 | -2.528841 | -0.764812 |
| 1  | -0.150059 | -2.492398 | -1.231335 |
| 1  | -1.489163 | -3.561993 | -0.772788 |
| 1  | -1.813283 | -1.905761 | -1.354219 |
| 6  | -2.541168 | -3.719537 | 1.917908  |
| 1  | -3.447850 | -3.807283 | 2.522964  |
| 1  | -1.694967 | -4.090525 | 2.497374  |
| 8  | -0.021591 | -2.768703 | 1.401715  |
| 1  | 0.833056  | -2.557659 | 1.004180  |
| 53 | 2.071516  | -0.223642 | -0.062125 |
| 1  | -2.188626 | -1.674361 | 2.449494  |
| 1  | -2.671999 | -4.348455 | 1.034956  |
| 16 | -3.910416 | -1.664658 | 0.750275  |
| 35 | 4.621446  | -0.433581 | -0.723465 |
| 1  | -3.459484 | -0.745788 | -0.169616 |
| 35 | -3.238626 | 0.597650  | -2.220668 |

31

Ph-Br RCS=4.2

|   |           |          |          |
|---|-----------|----------|----------|
| 6 | -0.601370 | 4.831813 | 1.321814 |
| 6 | -1.322091 | 4.238613 | 0.285800 |
| 6 | -1.315802 | 2.857053 | 0.117090 |
| 6 | -0.576927 | 2.058182 | 1.007319 |
| 6 | 0.144873  | 2.657197 | 2.055126 |
| 6 | 0.132245  | 4.038163 | 2.206619 |
| 1 | -0.610631 | 5.910019 | 1.443356 |

S26

|    |           |           |           |
|----|-----------|-----------|-----------|
| 1  | -1.898221 | 4.850376  | -0.399512 |
| 1  | -1.887839 | 2.378565  | -0.676737 |
| 1  | 0.713883  | 2.034019  | 2.734985  |
| 1  | 0.693319  | 4.496546  | 3.013705  |
| 6  | -0.591136 | 0.639664  | 0.849586  |
| 6  | -0.716171 | -0.566002 | 0.713075  |
| 6  | -1.065990 | -2.008042 | 0.676163  |
| 6  | -2.389736 | -2.225514 | 1.498897  |
| 6  | -1.139167 | -2.515769 | -0.769214 |
| 1  | -0.139908 | -2.497451 | -1.211529 |
| 1  | -1.508973 | -3.542567 | -0.777748 |
| 1  | -1.794501 | -1.888611 | -1.375963 |
| 6  | -2.525433 | -3.666384 | 2.008067  |
| 1  | -3.463057 | -3.762990 | 2.562305  |
| 1  | -1.697290 | -3.924126 | 2.668042  |
| 8  | -0.062100 | -2.736364 | 1.418466  |
| 1  | 0.797970  | -2.526533 | 1.032108  |
| 53 | 2.084132  | -0.243494 | -0.087086 |
| 1  | -2.328216 | -1.561206 | 2.362522  |
| 1  | -2.551830 | -4.380181 | 1.181764  |
| 16 | -3.967032 | -1.846621 | 0.601168  |
| 35 | 4.623771  | -0.503860 | -0.759507 |
| 1  | -3.590233 | -0.790479 | -0.198427 |
| 35 | -3.350168 | 0.718511  | -2.112830 |

31

Ph-Br RCS=4.4

|    |           |           |           |
|----|-----------|-----------|-----------|
| 6  | -0.463938 | 4.860688  | 1.285714  |
| 6  | -1.252152 | 4.271463  | 0.297689  |
| 6  | -1.272825 | 2.889052  | 0.136675  |
| 6  | -0.491784 | 2.085084  | 0.985224  |
| 6  | 0.298268  | 2.679856  | 1.984391  |
| 6  | 0.311097  | 4.061774  | 2.129267  |
| 1  | -0.452706 | 5.939471  | 1.401750  |
| 1  | -1.860766 | 4.886818  | -0.355596 |
| 1  | -1.897576 | 2.415118  | -0.619018 |
| 1  | 0.899903  | 2.053372  | 2.632329  |
| 1  | 0.924957  | 4.516591  | 2.899113  |
| 6  | -0.538123 | 0.665010  | 0.833755  |
| 6  | -0.732940 | -0.532235 | 0.700932  |
| 6  | -1.096964 | -1.971101 | 0.663744  |
| 6  | -2.445046 | -2.186471 | 1.463498  |
| 6  | -1.145643 | -2.485216 | -0.780260 |
| 1  | -0.139423 | -2.467657 | -1.206837 |
| 1  | -1.517116 | -3.511404 | -0.789301 |
| 1  | -1.794344 | -1.861993 | -1.397446 |
| 6  | -2.514599 | -3.577464 | 2.109134  |
| 1  | -3.469335 | -3.679390 | 2.631783  |
| 1  | -1.703291 | -3.717931 | 2.822462  |
| 8  | -0.102143 | -2.697494 | 1.421303  |
| 1  | 0.761174  | -2.498642 | 1.036410  |
| 53 | 2.108340  | -0.259421 | -0.104297 |
| 1  | -2.464568 | -1.437843 | 2.256778  |
| 1  | -2.456246 | -4.368215 | 1.357617  |
| 16 | -4.011544 | -2.013451 | 0.485627  |
| 35 | 4.638594  | -0.577323 | -0.783120 |
| 1  | -3.738969 | -0.880559 | -0.252458 |
| 35 | -3.488994 | 0.794297  | -1.985134 |

31

Ph-Br RCS=4.6

|   |           |          |           |
|---|-----------|----------|-----------|
| 6 | -0.457720 | 4.900394 | 1.176909  |
| 6 | -1.297676 | 4.280575 | 0.252241  |
| 6 | -1.301784 | 2.895605 | 0.114112  |
| 6 | -0.450937 | 2.119961 | 0.921500  |
| 6 | 0.391051  | 2.745562 | 1.857125  |
| 6 | 0.386364  | 4.129763 | 1.979429  |
| 1 | -0.459711 | 5.980949 | 1.275396  |
| 1 | -1.959956 | 4.873484 | -0.368755 |
| 1 | -1.966623 | 2.399008 | -0.590874 |
| 1 | 1.046564  | 2.141559 | 2.473225  |

S27

|    |           |           |           |
|----|-----------|-----------|-----------|
| 1  | 1.040844  | 4.608371  | 2.699785  |
| 6  | -0.485981 | 0.697469  | 0.791590  |
| 6  | -0.682727 | -0.501058 | 0.668628  |
| 6  | -1.083034 | -1.930421 | 0.622001  |
| 6  | -2.455576 | -2.092125 | 1.421847  |
| 6  | -1.138634 | -2.421872 | -0.829366 |
| 1  | -0.133236 | -2.395082 | -1.258750 |
| 1  | -1.511634 | -3.446818 | -0.850721 |
| 1  | -1.791425 | -1.790144 | -1.433474 |
| 6  | -2.446442 | -3.307562 | 2.359442  |
| 1  | -3.400269 | -3.348801 | 2.890840  |
| 1  | -1.636820 | -3.237634 | 3.085136  |
| 8  | -0.105427 | -2.695223 | 1.361190  |
| 1  | 0.754201  | -2.545031 | 0.947632  |
| 53 | 2.153763  | -0.259648 | -0.108412 |
| 1  | -2.580703 | -1.194521 | 2.027253  |
| 1  | -2.323592 | -4.239565 | 1.803123  |
| 16 | -3.989265 | -2.256916 | 0.393321  |
| 35 | 4.685949  | -0.601991 | -0.780563 |
| 1  | -3.891735 | -1.091477 | -0.341105 |
| 35 | -3.672380 | 0.762611  | -1.842532 |

31

Ph-Br RCS=4.8

|    |           |           |           |
|----|-----------|-----------|-----------|
| 6  | -1.163430 | 4.940610  | 0.624970  |
| 6  | -1.931127 | 4.113866  | -0.194883 |
| 6  | -1.693425 | 2.744097  | -0.240715 |
| 6  | -0.675578 | 2.193489  | 0.562832  |
| 6  | 0.087379  | 3.027982  | 1.401228  |
| 6  | -0.153361 | 4.395328  | 1.421372  |
| 1  | -1.352158 | 6.008710  | 0.648494  |
| 1  | -2.725552 | 4.530919  | -0.803332 |
| 1  | -2.309445 | 2.086302  | -0.850910 |
| 1  | 0.868965  | 2.596178  | 2.014670  |
| 1  | 0.443476  | 5.037129  | 2.059969  |
| 6  | -0.468001 | 0.789244  | 0.531453  |
| 6  | -0.313146 | -0.424550 | 0.472751  |
| 6  | -0.844766 | -1.819281 | 0.431973  |
| 6  | -2.207995 | -1.699077 | 1.199763  |
| 6  | -0.987753 | -2.228980 | -1.038792 |
| 1  | -0.016938 | -2.157410 | -1.538569 |
| 1  | -1.346474 | -3.257125 | -1.082832 |
| 1  | -1.703063 | -1.578822 | -1.549329 |
| 6  | -2.016887 | -1.662036 | 2.717158  |
| 1  | -2.963811 | -1.405793 | 3.195594  |
| 1  | -1.269775 | -0.913848 | 2.996632  |
| 8  | -0.018203 | -2.738703 | 1.145148  |
| 1  | 0.816764  | -2.819616 | 0.669454  |
| 53 | 2.303854  | -0.169518 | -0.083336 |
| 1  | -2.672885 | -0.776734 | 0.850915  |
| 1  | -1.680108 | -2.627564 | 3.098645  |
| 16 | -3.436278 | -2.977160 | 0.740096  |
| 35 | 4.913652  | -0.418455 | -0.611605 |
| 1  | -4.013079 | -2.205762 | -0.226909 |
| 35 | -4.137810 | 0.126681  | -1.485625 |

31

Ph-Br RCS=5.0

|   |           |           |           |
|---|-----------|-----------|-----------|
| 6 | -0.835881 | 5.019375  | 0.596810  |
| 6 | -1.734479 | 4.220181  | -0.109746 |
| 6 | -1.578859 | 2.838081  | -0.143390 |
| 6 | -0.506807 | 2.247282  | 0.553362  |
| 6 | 0.392199  | 3.053411  | 1.272654  |
| 6 | 0.227403  | 4.433126  | 1.286396  |
| 1 | -0.962550 | 6.096732  | 0.612800  |
| 1 | -2.567262 | 4.668622  | -0.639687 |
| 1 | -2.288984 | 2.205544  | -0.673243 |
| 1 | 1.216935  | 2.592584  | 1.802710  |
| 1 | 0.927944  | 5.052069  | 1.836194  |
| 6 | -0.396727 | 0.826684  | 0.530126  |
| 6 | -0.432138 | -0.393638 | 0.473444  |

S28

|    |           |           |           |
|----|-----------|-----------|-----------|
| 6  | -0.971106 | -1.780334 | 0.379951  |
| 6  | -2.349881 | -1.712650 | 1.120270  |
| 6  | -1.093219 | -2.141580 | -1.106607 |
| 1  | -0.118356 | -2.048551 | -1.594299 |
| 1  | -1.445318 | -3.169748 | -1.188357 |
| 1  | -1.807243 | -1.476177 | -1.599441 |
| 6  | -2.191446 | -1.622963 | 2.638861  |
| 1  | -3.161904 | -1.417901 | 3.093913  |
| 1  | -1.503576 | -0.816435 | 2.908574  |
| 8  | -0.149290 | -2.720428 | 1.077145  |
| 1  | 0.698297  | -2.772861 | 0.620046  |
| 53 | 2.303709  | -0.219764 | -0.075281 |
| 1  | -2.863121 | -0.830512 | 0.731415  |
| 1  | -1.796815 | -2.552072 | 3.054378  |
| 16 | -3.495571 | -3.094169 | 0.685295  |
| 35 | 4.884181  | -0.580249 | -0.591653 |
| 1  | -4.154720 | -2.372180 | -0.258016 |
| 35 | -4.207632 | 0.289867  | -1.386968 |

31

Ph-Br RCS=5.2

|    |           |           |           |
|----|-----------|-----------|-----------|
| 6  | -0.583299 | 5.060847  | 0.650633  |
| 6  | -1.551488 | 4.320184  | -0.027325 |
| 6  | -1.476871 | 2.931660  | -0.076156 |
| 6  | -0.413847 | 2.274167  | 0.571897  |
| 6  | 0.556571  | 3.020993  | 1.259853  |
| 6  | 0.470031  | 4.408051  | 1.293367  |
| 1  | -0.647760 | 6.143482  | 0.679960  |
| 1  | -2.375997 | 4.820145  | -0.523227 |
| 1  | -2.238330 | 2.344327  | -0.586730 |
| 1  | 1.374810  | 2.510391  | 1.752902  |
| 1  | 1.225287  | 4.980195  | 1.821101  |
| 6  | -0.389568 | 0.846072  | 0.528724  |
| 6  | -0.576146 | -0.360130 | 0.463450  |
| 6  | -1.084330 | -1.757557 | 0.332060  |
| 6  | -2.485192 | -1.795796 | 1.028959  |
| 6  | -1.162124 | -2.093981 | -1.164517 |
| 1  | -0.181060 | -1.966199 | -1.630314 |
| 1  | -1.481689 | -3.130376 | -1.274145 |
| 1  | -1.881072 | -1.433240 | -1.657055 |
| 6  | -2.394728 | -1.585711 | 2.540726  |
| 1  | -3.398527 | -1.490329 | 2.957569  |
| 1  | -1.839361 | -0.670982 | 2.766257  |
| 8  | -0.239994 | -2.677702 | 1.034305  |
| 1  | 0.627895  | -2.671012 | 0.613207  |
| 53 | 2.267649  | -0.246453 | -0.074418 |
| 1  | -3.085228 | -1.009031 | 0.562564  |
| 1  | -1.886253 | -2.418504 | 3.030922  |
| 16 | -3.431089 | -3.368597 | 0.689097  |
| 35 | 4.831009  | -0.684910 | -0.578162 |
| 1  | -4.199323 | -2.833782 | -0.284801 |
| 35 | -4.169165 | 0.501862  | -1.364526 |

31

Ph-Br RCS=5.4

|   |           |           |           |
|---|-----------|-----------|-----------|
| 6 | -0.332082 | 5.095724  | 0.675705  |
| 6 | -1.351239 | 4.411855  | 0.012808  |
| 6 | -1.349957 | 3.021756  | -0.047911 |
| 6 | -0.308784 | 2.303349  | 0.569130  |
| 6 | 0.713470  | 2.992960  | 1.239775  |
| 6 | 0.698792  | 4.382677  | 1.289359  |
| 1 | -0.339775 | 6.179948  | 0.715730  |
| 1 | -2.158933 | 4.958323  | -0.461432 |
| 1 | -2.150408 | 2.478512  | -0.546829 |
| 1 | 1.515347  | 2.437351  | 1.710222  |
| 1 | 1.493678  | 4.909250  | 1.806318  |
| 6 | -0.363388 | 0.872058  | 0.509542  |
| 6 | -0.727150 | -0.298409 | 0.446207  |
| 6 | -1.208408 | -1.715173 | 0.282421  |
| 6 | -2.626481 | -1.878412 | 0.939536  |
| 6 | -1.241694 | -2.027122 | -1.221504 |

S29

|    |           |           |           |
|----|-----------|-----------|-----------|
| 1  | -0.253684 | -1.872748 | -1.663102 |
| 1  | -1.536260 | -3.068367 | -1.356309 |
| 1  | -1.960088 | -1.368446 | -1.717162 |
| 6  | -2.605320 | -1.606055 | 2.442444  |
| 1  | -3.622689 | -1.619735 | 2.836074  |
| 1  | -2.174779 | -0.619681 | 2.637991  |
| 8  | -0.334958 | -2.607076 | 0.988107  |
| 1  | 0.544781  | -2.544219 | 0.596312  |
| 53 | 2.238185  | -0.268255 | -0.068935 |
| 1  | -3.288075 | -1.171886 | 0.430744  |
| 1  | -2.008613 | -2.348769 | 2.976306  |
| 16 | -3.410556 | -3.583727 | 0.653582  |
| 35 | 4.785066  | -0.815391 | -0.556257 |
| 1  | -4.224783 | -3.178988 | -0.342563 |
| 35 | -4.127852 | 0.698589  | -1.305342 |

39

Bu-NO3 1ec

|    |           |           |           |
|----|-----------|-----------|-----------|
| 6  | -0.493394 | 0.665713  | 0.867910  |
| 6  | -0.607472 | -0.549234 | 0.700659  |
| 6  | -1.320175 | -1.874942 | 0.668705  |
| 6  | -1.420435 | -2.359735 | -0.821975 |
| 6  | -0.572449 | -2.880781 | 1.556119  |
| 1  | -0.459008 | -2.461401 | 2.557026  |
| 1  | -1.162122 | -3.794177 | 1.618483  |
| 1  | 0.413300  | -3.119337 | 1.153077  |
| 6  | -2.029851 | -1.324318 | -1.768291 |
| 1  | -2.105394 | -1.741112 | -2.773906 |
| 1  | -1.403984 | -0.428872 | -1.817423 |
| 8  | -2.600294 | -1.704396 | 1.237281  |
| 1  | -2.985409 | -0.806157 | 1.051963  |
| 53 | 1.852141  | -0.381893 | 0.099501  |
| 1  | -0.412866 | -2.619801 | -1.158034 |
| 1  | -3.028663 | -1.020015 | -1.446803 |
| 16 | -2.334403 | -3.967706 | -0.929748 |
| 1  | -3.455742 | -3.510733 | -0.334813 |
| 8  | -4.687355 | 0.720860  | -0.690020 |
| 8  | 3.964862  | -0.823963 | -0.574036 |
| 7  | -3.999962 | 1.405724  | 0.088295  |
| 7  | 4.956846  | -0.003044 | -0.205082 |
| 8  | -3.387520 | 0.831960  | 1.060332  |
| 8  | -3.875463 | 2.638506  | -0.048799 |
| 8  | 6.072949  | -0.332944 | -0.576408 |
| 8  | 4.688781  | 0.993972  | 0.455688  |
| 6  | -0.520125 | 2.103578  | 1.081196  |
| 1  | -1.506548 | 2.278750  | 1.532508  |
| 1  | 0.246742  | 2.383185  | 1.812172  |
| 6  | -0.395253 | 2.946612  | -0.202155 |
| 1  | -1.181197 | 2.638504  | -0.896600 |
| 1  | 0.570235  | 2.748326  | -0.679840 |
| 6  | -0.541256 | 4.442580  | 0.090271  |
| 1  | -1.514959 | 4.613457  | 0.561019  |
| 1  | 0.223353  | 4.750932  | 0.815058  |
| 6  | -0.426418 | 5.302410  | -1.171544 |
| 1  | -1.204922 | 5.038913  | -1.893484 |
| 1  | -0.534878 | 6.365935  | -0.938393 |
| 1  | 0.544154  | 5.165190  | -1.659744 |

39

Bu-NO3 1r

|   |           |           |           |
|---|-----------|-----------|-----------|
| 6 | 0.780809  | 0.376775  | -1.061482 |
| 6 | -0.134745 | -0.468749 | -0.579793 |
| 6 | 0.350386  | -1.887283 | -0.273088 |
| 6 | 1.595332  | -2.098788 | -1.176571 |
| 6 | 0.636229  | -2.031059 | 1.229591  |
| 1 | -0.269901 | -1.803256 | 1.794475  |
| 1 | 0.935066  | -3.055833 | 1.460211  |
| 1 | 1.421479  | -1.344148 | 1.556717  |
| 6 | 2.577470  | -3.186888 | -0.767192 |
| 1 | 3.373992  | -3.289804 | -1.508334 |
| 1 | 2.046664  | -4.140864 | -0.705983 |

S30

|    |           |           |           |
|----|-----------|-----------|-----------|
| 8  | -0.571061 | -2.900209 | -0.684874 |
| 1  | -1.461754 | -2.625064 | -0.420213 |
| 53 | -2.162057 | 0.028021  | -0.120124 |
| 1  | 1.198440  | -2.319003 | -2.169448 |
| 1  | 3.043529  | -2.986152 | 0.198754  |
| 16 | 2.383423  | -0.428475 | -1.345311 |
| 1  | 3.584967  | -0.081489 | 0.429011  |
| 8  | 4.049434  | 0.239019  | 1.262212  |
| 8  | -4.659851 | 0.778918  | 0.422115  |
| 7  | 5.289473  | -0.369402 | 1.291386  |
| 7  | -5.535886 | -0.079836 | 0.800821  |
| 8  | 5.550244  | -1.145657 | 0.393382  |
| 8  | 5.979313  | -0.051807 | 2.226714  |
| 8  | -6.692169 | 0.308724  | 1.041558  |
| 8  | -5.205193 | -1.279031 | 0.917523  |
| 6  | 0.668870  | 1.837510  | -1.380611 |
| 1  | 1.113059  | 2.027163  | -2.365803 |
| 1  | -0.393526 | 2.085326  | -1.453827 |
| 6  | 1.332528  | 2.757158  | -0.337824 |
| 1  | 2.397689  | 2.511700  | -0.246887 |
| 1  | 0.884544  | 2.558858  | 0.642075  |
| 6  | 1.184000  | 4.243422  | -0.680166 |
| 1  | 1.624143  | 4.433401  | -1.667336 |
| 1  | 0.118624  | 4.486242  | -0.768503 |
| 6  | 1.834063  | 5.166103  | 0.355152  |
| 1  | 2.906920  | 4.967128  | 0.445074  |
| 1  | 1.711437  | 6.219184  | 0.084700  |
| 1  | 1.388367  | 5.022906  | 1.344311  |
| 6  | 0.780809  | 0.376775  | -1.061482 |
| 6  | -0.134745 | -0.468749 | -0.579793 |
| 6  | 0.350386  | -1.887283 | -0.273088 |
| 6  | 1.595332  | -2.098788 | -1.176571 |
| 6  | 0.636229  | -2.031059 | 1.229591  |
| 1  | -0.269901 | -1.803256 | 1.794475  |
| 1  | 0.935066  | -3.055833 | 1.460211  |
| 1  | 1.421479  | -1.344148 | 1.556717  |
| 6  | 2.577470  | -3.186888 | -0.767192 |
| 1  | 3.373992  | -3.289804 | -1.508334 |
| 1  | 2.046664  | -4.140864 | -0.705983 |
| 8  | -0.571061 | -2.900209 | -0.684874 |
| 1  | -1.461754 | -2.625064 | -0.420213 |
| 53 | -2.162057 | 0.028021  | -0.120124 |
| 1  | 1.198440  | -2.319003 | -2.169448 |
| 1  | 3.043529  | -2.986152 | 0.198754  |
| 16 | 2.383423  | -0.428475 | -1.345311 |
| 1  | 3.584967  | -0.081489 | 0.429011  |
| 8  | 4.049434  | 0.239019  | 1.262212  |
| 8  | -4.659851 | 0.778918  | 0.422115  |
| 7  | 5.289473  | -0.369402 | 1.291386  |
| 7  | -5.535886 | -0.079836 | 0.800821  |
| 8  | 5.550244  | -1.145657 | 0.393382  |
| 8  | 5.979313  | -0.051807 | 2.226714  |
| 8  | -6.692169 | 0.308724  | 1.041558  |
| 8  | -5.205193 | -1.279031 | 0.917523  |
| 6  | 0.668870  | 1.837510  | -1.380611 |
| 1  | 1.113059  | 2.027163  | -2.365803 |
| 1  | -0.393526 | 2.085326  | -1.453827 |
| 6  | 1.332528  | 2.757158  | -0.337824 |
| 1  | 2.397689  | 2.511700  | -0.246887 |
| 1  | 0.884544  | 2.558858  | 0.642075  |
| 6  | 1.184000  | 4.243422  | -0.680166 |
| 1  | 1.624143  | 4.433401  | -1.667336 |
| 1  | 0.118624  | 4.486242  | -0.768503 |
| 6  | 1.834063  | 5.166103  | 0.355152  |
| 1  | 2.906920  | 4.967128  | 0.445074  |
| 1  | 1.711437  | 6.219184  | 0.084700  |
| 1  | 1.388367  | 5.022906  | 1.344311  |

39

Bu-NO3 RC=1.8

|   |          |          |           |
|---|----------|----------|-----------|
| 6 | 0.786735 | 0.363793 | -1.060394 |
|---|----------|----------|-----------|

S31

|               |           |           |           |
|---------------|-----------|-----------|-----------|
| 6             | -0.132924 | -0.477077 | -0.575607 |
| 6             | 0.351573  | -1.893801 | -0.260220 |
| 6             | 1.600028  | -2.106987 | -1.158298 |
| 6             | 0.632585  | -2.030450 | 1.244028  |
| 1             | -0.275658 | -1.800989 | 1.804811  |
| 1             | 0.931837  | -3.053802 | 1.480468  |
| 1             | 1.416066  | -1.341164 | 1.570591  |
| 6             | 2.587756  | -3.185629 | -0.738036 |
| 1             | 3.388697  | -3.287202 | -1.474577 |
| 1             | 2.063474  | -4.143024 | -0.673850 |
| 8             | -0.567399 | -2.909657 | -0.670485 |
| 1             | -1.459362 | -2.633247 | -0.411478 |
| 53            | -2.159946 | 0.023042  | -0.122699 |
| 1             | 1.207401  | -2.336695 | -2.150746 |
| 1             | 3.047268  | -2.976272 | 0.229246  |
| 16            | 2.377240  | -0.432174 | -1.337398 |
| 1             | 3.589252  | -0.074460 | 0.429278  |
| 8             | 4.057048  | 0.245929  | 1.260430  |
| 8             | -4.660230 | 0.779369  | 0.410266  |
| 7             | 5.306606  | -0.343728 | 1.271464  |
| 7             | -5.537002 | -0.075924 | 0.794549  |
| 8             | 5.570202  | -1.107016 | 0.363285  |
| 8             | 6.000668  | -0.024665 | 2.203111  |
| 8             | -6.693583 | 0.314780  | 1.030724  |
| 8             | -5.206926 | -1.274362 | 0.921195  |
| 6             | 0.670265  | 1.824166  | -1.384525 |
| 1             | 1.126520  | 2.014532  | -2.364046 |
| 1             | -0.392293 | 2.066155  | -1.472218 |
| 6             | 1.314677  | 2.749542  | -0.334670 |
| 1             | 2.379850  | 2.510222  | -0.228514 |
| 1             | 0.854194  | 2.550714  | 0.639299  |
| 6             | 1.162655  | 4.234306  | -0.681937 |
| 1             | 1.615485  | 4.424967  | -1.663231 |
| 1             | 0.097260  | 4.470894  | -0.785564 |
| 6             | 1.792957  | 5.162558  | 0.360597  |
| 1             | 2.865542  | 4.969763  | 0.465980  |
| 1             | 1.668294  | 6.214429  | 0.086389  |
| 1             | 1.334140  | 5.018745  | 1.343643  |
| 39            |           |           |           |
| Bu-NO3 RC=2.0 |           |           |           |
| 6             | 0.719880  | 0.512253  | -1.066617 |
| 6             | -0.146354 | -0.385275 | -0.620964 |
| 6             | 0.349624  | -1.816617 | -0.395344 |
| 6             | 1.564301  | -2.010969 | -1.345214 |
| 6             | 0.675981  | -2.023478 | 1.091694  |
| 1             | -0.213491 | -1.818768 | 1.691055  |
| 1             | 0.977752  | -3.057611 | 1.269360  |
| 1             | 1.471133  | -1.352207 | 1.425140  |
| 6             | 2.483546  | -3.186281 | -1.035453 |
| 1             | 3.236594  | -3.303279 | -1.818883 |
| 1             | 1.889236  | -4.103179 | -0.997151 |
| 8             | -0.591456 | -2.804711 | -0.821581 |
| 1             | -1.469186 | -2.550198 | -0.499559 |
| 53            | -2.181070 | 0.072486  | -0.100560 |
| 1             | 1.131709  | -2.141654 | -2.338743 |
| 1             | 3.007490  | -3.066317 | -0.086106 |
| 16            | 2.465120  | -0.396893 | -1.423814 |
| 1             | 3.567834  | -0.147587 | 0.410518  |
| 8             | 4.008800  | 0.178789  | 1.257172  |
| 8             | -4.650484 | 0.759677  | 0.519041  |
| 7             | 5.118722  | -0.612167 | 1.470913  |
| 7             | -5.516754 | -0.129992 | 0.853209  |
| 8             | 5.317558  | -1.518941 | 0.685955  |
| 8             | 5.773638  | -0.305061 | 2.435128  |
| 8             | -6.671061 | 0.235841  | 1.131035  |
| 8             | -5.175929 | -1.330308 | 0.889446  |
| 6             | 0.659836  | 1.974843  | -1.336566 |
| 1             | 1.012031  | 2.168076  | -2.357330 |
| 1             | -0.393256 | 2.271547  | -1.298999 |
| 6             | 1.469141  | 2.831778  | -0.345944 |

S32

|   |          |          |           |
|---|----------|----------|-----------|
| 1 | 2.522660 | 2.528801 | -0.370137 |
| 1 | 1.112943 | 2.630205 | 0.670201  |
| 6 | 1.365874 | 4.331864 | -0.641264 |
| 1 | 1.712994 | 4.523960 | -1.664386 |
| 1 | 0.311731 | 4.631986 | -0.614955 |
| 6 | 2.166787 | 5.192911 | 0.339978  |
| 1 | 3.230782 | 4.936448 | 0.314677  |
| 1 | 2.074201 | 6.257454 | 0.104840  |
| 1 | 1.817620 | 5.047495 | 1.366896  |

39

Bu-NO3 RC=2.2

|    |           |           |           |
|----|-----------|-----------|-----------|
| 6  | 0.651963  | 0.628617  | -1.054949 |
| 6  | -0.158868 | -0.317281 | -0.644622 |
| 6  | 0.351337  | -1.751229 | -0.461530 |
| 6  | 1.552107  | -1.942116 | -1.433167 |
| 6  | 0.695179  | -1.982828 | 1.017944  |
| 1  | -0.187230 | -1.791721 | 1.632299  |
| 1  | 1.001196  | -3.019202 | 1.172309  |
| 1  | 1.492511  | -1.315630 | 1.352324  |
| 6  | 2.404311  | -3.182883 | -1.179252 |
| 1  | 3.131002  | -3.318075 | -1.984187 |
| 1  | 1.757244  | -4.063736 | -1.153557 |
| 8  | -0.598496 | -2.728046 | -0.892836 |
| 1  | -1.465030 | -2.499671 | -0.524958 |
| 53 | -2.212704 | 0.105146  | -0.096743 |
| 1  | 1.102893  | -2.013879 | -2.425218 |
| 1  | 2.957076  | -3.121098 | -0.240631 |
| 16 | 2.556300  | -0.393624 | -1.465467 |
| 1  | 3.596762  | -0.219487 | 0.383187  |
| 8  | 4.031225  | 0.097449  | 1.241690  |
| 8  | -4.654186 | 0.722932  | 0.545709  |
| 7  | 5.051749  | -0.777991 | 1.540184  |
| 7  | -5.500770 | -0.191633 | 0.876262  |
| 8  | 5.201702  | -1.735383 | 0.805795  |
| 8  | 5.690727  | -0.487315 | 2.521297  |
| 8  | -6.657146 | 0.150946  | 1.167852  |
| 8  | -5.135081 | -1.383069 | 0.893226  |
| 6  | 0.652553  | 2.087150  | -1.297302 |
| 1  | 0.981517  | 2.283528  | -2.324520 |
| 1  | -0.390058 | 2.419550  | -1.226126 |
| 6  | 1.519463  | 2.892582  | -0.313519 |
| 1  | 2.556214  | 2.542298  | -0.371177 |
| 1  | 1.180462  | 2.689253  | 0.707938  |
| 6  | 1.472787  | 4.399954  | -0.584778 |
| 1  | 1.801984  | 4.592806  | -1.613616 |
| 1  | 0.433862  | 4.745624  | -0.526559 |
| 6  | 2.335571  | 5.209745  | 0.387580  |
| 1  | 3.386067  | 4.907365  | 0.330447  |
| 1  | 2.283845  | 6.280803  | 0.170327  |
| 1  | 2.006982  | 5.063505  | 1.421141  |

39

Bu-NO3 RC=2.4

|    |           |           |           |
|----|-----------|-----------|-----------|
| 6  | 0.578558  | 0.741652  | -1.039235 |
| 6  | -0.170220 | -0.250728 | -0.665082 |
| 6  | 0.356418  | -1.683897 | -0.508346 |
| 6  | 1.547758  | -1.873163 | -1.495377 |
| 6  | 0.714340  | -1.922164 | 0.966599  |
| 1  | -0.163688 | -1.744127 | 1.591381  |
| 1  | 1.031189  | -2.956753 | 1.109281  |
| 1  | 1.508964  | -1.250330 | 1.296331  |
| 6  | 2.333735  | -3.168319 | -1.286939 |
| 1  | 3.039093  | -3.317799 | -2.107870 |
| 1  | 1.641620  | -4.014436 | -1.271794 |
| 8  | -0.598101 | -2.655833 | -0.937441 |
| 1  | -1.451425 | -2.458088 | -0.524671 |
| 53 | -2.251246 | 0.136379  | -0.100348 |
| 1  | 1.088041  | -1.895069 | -2.485082 |
| 1  | 2.905879  | -3.158149 | -0.357888 |
| 16 | 2.644079  | -0.392166 | -1.495389 |



### S33

|   |           |           |           |
|---|-----------|-----------|-----------|
| 1 | 3.643975  | -0.288433 | 0.343958  |
| 8 | 4.083441  | 0.015667  | 1.211413  |
| 8 | -4.662953 | 0.672291  | 0.547176  |
| 7 | 5.018782  | -0.925718 | 1.568944  |
| 7 | -5.479680 | -0.269319 | 0.894315  |
| 8 | 5.110740  | -1.920352 | 0.875197  |
| 8 | 5.654918  | -0.651946 | 2.558394  |
| 8 | -6.640281 | 0.045520  | 1.191828  |
| 8 | -5.076831 | -1.445971 | 0.917835  |
| 6 | 0.643659  | 2.192884  | -1.261242 |
| 1 | 0.978141  | 2.389384  | -2.285968 |
| 1 | -0.388593 | 2.561135  | -1.186758 |
| 6 | 1.537259  | 2.950002  | -0.263544 |
| 1 | 2.556573  | 2.554348  | -0.324439 |
| 1 | 1.185976  | 2.747740  | 0.753780  |
| 6 | 1.552793  | 4.460816  | -0.517865 |
| 1 | 1.893448  | 4.651576  | -1.543315 |
| 1 | 0.529143  | 4.849634  | -0.458418 |
| 6 | 2.445804  | 5.222138  | 0.466274  |
| 1 | 3.482561  | 4.876166  | 0.408209  |
| 1 | 2.439839  | 6.296801  | 0.261245  |
| 1 | 2.108211  | 5.077878  | 1.497205  |

39

Bu-NO3 RC=2.6

|    |           |           |           |
|----|-----------|-----------|-----------|
| 6  | 0.499878  | 0.856910  | -1.021071 |
| 6  | -0.177293 | -0.182270 | -0.685867 |
| 6  | 0.365722  | -1.613649 | -0.551240 |
| 6  | 1.551718  | -1.797250 | -1.549457 |
| 6  | 0.733572  | -1.856338 | 0.920226  |
| 1  | -0.142929 | -1.695968 | 1.552236  |
| 1  | 1.066406  | -2.887181 | 1.051984  |
| 1  | 1.521108  | -1.176057 | 1.247969  |
| 6  | 2.274024  | -3.138408 | -1.386909 |
| 1  | 2.964171  | -3.292335 | -2.219539 |
| 1  | 1.544218  | -3.952291 | -1.388697 |
| 8  | -0.591653 | -2.581331 | -0.980339 |
| 1  | -1.429926 | -2.417404 | -0.525126 |
| 53 | -2.291777 | 0.168323  | -0.106171 |
| 1  | 1.087005  | -1.769380 | -2.536913 |
| 1  | 2.856841  | -3.180221 | -0.465330 |
| 16 | 2.730531  | -0.383877 | -1.515678 |
| 1  | 3.692486  | -0.356955 | 0.303919  |
| 8  | 4.141000  | -0.073821 | 1.182916  |
| 8  | -4.671507 | 0.610734  | 0.544058  |
| 7  | 4.993250  | -1.070873 | 1.581223  |
| 7  | -5.449983 | -0.362994 | 0.910686  |
| 8  | 5.021779  | -2.090525 | 0.918214  |
| 8  | 5.633828  | -0.820149 | 2.575879  |
| 8  | -6.615106 | -0.082930 | 1.215488  |
| 8  | -5.001894 | -1.519948 | 0.941108  |
| 6  | 0.629148  | 2.298521  | -1.225069 |
| 1  | 0.985640  | 2.491067  | -2.242618 |
| 1  | -0.390945 | 2.705509  | -1.164521 |
| 6  | 1.533426  | 3.008841  | -0.202434 |
| 1  | 2.532957  | 2.565467  | -0.248206 |
| 1  | 1.152065  | 2.815120  | 0.805541  |
| 6  | 1.619610  | 4.518831  | -0.446416 |
| 1  | 1.990903  | 4.700319  | -1.462801 |
| 1  | 0.613158  | 4.952900  | -0.406083 |
| 6  | 2.524185  | 5.233363  | 0.561938  |
| 1  | 3.545081  | 4.841043  | 0.523639  |
| 1  | 2.570963  | 6.308307  | 0.363911  |
| 1  | 2.158102  | 5.098494  | 1.584389  |

39

Bu-NO3 RC=2.8

|   |           |           |           |
|---|-----------|-----------|-----------|
| 6 | 0.414537  | 0.976888  | -0.993368 |
| 6 | -0.176833 | -0.110913 | -0.701717 |
| 6 | 0.382344  | -1.539594 | -0.594850 |
| 6 | 1.564510  | -1.708342 | -1.604454 |

S34

|    |           |           |           |
|----|-----------|-----------|-----------|
| 6  | 0.760815  | -1.793852 | 0.871484  |
| 1  | -0.114259 | -1.657721 | 1.511488  |
| 1  | 1.113314  | -2.820045 | 0.986179  |
| 1  | 1.539268  | -1.104750 | 1.201018  |
| 6  | 2.228416  | -3.087496 | -1.497916 |
| 1  | 2.908126  | -3.232420 | -2.340392 |
| 1  | 1.468083  | -3.872330 | -1.525713 |
| 8  | -0.576999 | -2.501601 | -1.029143 |
| 1  | -1.399149 | -2.373882 | -0.535555 |
| 53 | -2.329777 | 0.200038  | -0.102592 |
| 1  | 1.097326  | -1.625712 | -2.587980 |
| 1  | 2.816068  | -3.185773 | -0.583694 |
| 16 | 2.815399  | -0.360263 | -1.529920 |
| 1  | 3.741935  | -0.423266 | 0.264297  |
| 8  | 4.202748  | -0.171653 | 1.157322  |
| 8  | -4.675439 | 0.540290  | 0.552494  |
| 7  | 4.964051  | -1.223607 | 1.583814  |
| 7  | -5.415047 | -0.473149 | 0.913606  |
| 8  | 4.918057  | -2.257570 | 0.943189  |
| 8  | 5.613735  | -1.007837 | 2.582890  |
| 8  | -6.585158 | -0.235359 | 1.225109  |
| 8  | -4.921262 | -1.608482 | 0.928577  |
| 6  | 0.597756  | 2.408840  | -1.178686 |
| 1  | 0.973666  | 2.596649  | -2.189976 |
| 1  | -0.407828 | 2.853725  | -1.129561 |
| 6  | 1.513671  | 3.073640  | -0.134941 |
| 1  | 2.491215  | 2.583890  | -0.168415 |
| 1  | 1.105675  | 2.891955  | 0.864735  |
| 6  | 1.669654  | 4.579255  | -0.370296 |
| 1  | 2.069595  | 4.747958  | -1.377876 |
| 1  | 0.682678  | 5.057581  | -0.348133 |
| 6  | 2.584388  | 5.248692  | 0.659604  |
| 1  | 3.586861  | 4.810565  | 0.640235  |
| 1  | 2.683611  | 6.321044  | 0.467091  |
| 1  | 2.191577  | 5.126988  | 1.673771  |

39

Bu-NO3 RC=3.0

|    |           |           |           |
|----|-----------|-----------|-----------|
| 6  | 0.319140  | 1.092726  | -0.968603 |
| 6  | -0.162066 | -0.045117 | -0.720273 |
| 6  | 0.416859  | -1.466247 | -0.639361 |
| 6  | 1.600892  | -1.609918 | -1.655418 |
| 6  | 0.802588  | -1.735062 | 0.821905  |
| 1  | -0.073495 | -1.631171 | 1.466916  |
| 1  | 1.180855  | -2.753949 | 0.916615  |
| 1  | 1.566718  | -1.034102 | 1.158806  |
| 6  | 2.218146  | -3.016026 | -1.609426 |
| 1  | 2.896255  | -3.138792 | -2.456452 |
| 1  | 1.436877  | -3.777702 | -1.673240 |
| 8  | -0.538744 | -2.426586 | -1.085111 |
| 1  | -1.346713 | -2.337437 | -0.561508 |
| 53 | -2.360514 | 0.219524  | -0.095182 |
| 1  | 1.136761  | -1.472164 | -2.634529 |
| 1  | 2.802388  | -3.170515 | -0.700827 |
| 16 | 2.906783  | -0.317072 | -1.531253 |
| 1  | 3.794084  | -0.470088 | 0.233317  |
| 8  | 4.266627  | -0.256635 | 1.142963  |
| 8  | -4.669254 | 0.443892  | 0.567930  |
| 7  | 4.944449  | -1.353925 | 1.581527  |
| 7  | -5.362235 | -0.616416 | 0.911445  |
| 8  | 4.824692  | -2.391153 | 0.954112  |
| 8  | 5.607596  | -1.178744 | 2.581926  |
| 8  | -6.536621 | -0.431388 | 1.231833  |
| 8  | -4.816894 | -1.724667 | 0.898142  |
| 6  | 0.528787  | 2.518917  | -1.138355 |
| 1  | 0.932252  | 2.701817  | -2.140060 |
| 1  | -0.466509 | 2.987750  | -1.112503 |
| 6  | 1.436774  | 3.154630  | -0.068355 |
| 1  | 2.398767  | 2.634669  | -0.080497 |
| 1  | 0.997314  | 2.983095  | 0.919694  |
| 6  | 1.641635  | 4.655289  | -0.296770 |

S35

|   |          |          |           |
|---|----------|----------|-----------|
| 1 | 2.075525 | 4.813130 | -1.291882 |
| 1 | 0.668508 | 5.162059 | -0.302175 |
| 6 | 2.545338 | 5.296727 | 0.760332  |
| 1 | 3.534382 | 4.829045 | 0.769055  |
| 1 | 2.681644 | 6.365759 | 0.572222  |
| 1 | 2.119821 | 5.186068 | 1.762537  |

39

Bu-NO3 RC=3.2

|    |           |           |           |
|----|-----------|-----------|-----------|
| 6  | 0.203546  | 1.194339  | -0.956697 |
| 6  | -0.115700 | 0.005489  | -0.750526 |
| 6  | 0.489131  | -1.398668 | -0.694721 |
| 6  | 1.687752  | -1.494471 | -1.704464 |
| 6  | 0.869950  | -1.692813 | 0.762322  |
| 1  | -0.014211 | -1.638239 | 1.402726  |
| 1  | 1.285002  | -2.699175 | 0.831168  |
| 1  | 1.607361  | -0.975589 | 1.123017  |
| 6  | 2.285838  | -2.910671 | -1.721316 |
| 1  | 2.975966  | -2.992206 | -2.563429 |
| 1  | 1.500844  | -3.662573 | -1.835424 |
| 8  | -0.449843 | -2.362415 | -1.171179 |
| 1  | -1.247858 | -2.323361 | -0.627620 |
| 53 | -2.375729 | 0.209418  | -0.084613 |
| 1  | 1.234907  | -1.305109 | -2.680576 |
| 1  | 2.857383  | -3.115459 | -0.814648 |
| 16 | 3.015478  | -0.229389 | -1.509905 |
| 1  | 3.845367  | -0.470610 | 0.220918  |
| 8  | 4.318311  | -0.302004 | 1.157094  |
| 8  | -4.638280 | 0.291644  | 0.593917  |
| 7  | 4.939292  | -1.428856 | 1.587934  |
| 7  | -5.269833 | -0.824933 | 0.907193  |
| 8  | 4.769217  | -2.459125 | 0.958115  |
| 8  | 5.613016  | -1.295150 | 2.590276  |
| 8  | -6.445773 | -0.708530 | 1.242170  |
| 8  | -4.663231 | -1.895770 | 0.849220  |
| 6  | 0.385552  | 2.624389  | -1.115668 |
| 1  | 0.834134  | 2.807040  | -2.098594 |
| 1  | -0.612684 | 3.083878  | -1.139994 |
| 6  | 1.241117  | 3.267651  | -0.006591 |
| 1  | 2.204565  | 2.751305  | 0.025743  |
| 1  | 0.756786  | 3.097940  | 0.960610  |
| 6  | 1.449287  | 4.768156  | -0.232182 |
| 1  | 1.930079  | 4.923211  | -1.205840 |
| 1  | 0.475020  | 5.270127  | -0.286922 |
| 6  | 2.298191  | 5.418772  | 0.863965  |
| 1  | 3.287650  | 4.955739  | 0.922026  |
| 1  | 2.438595  | 6.487470  | 0.677132  |
| 1  | 1.825535  | 5.310969  | 1.845170  |

39

Bu-NO3 RC=3.4

|    |           |           |           |
|----|-----------|-----------|-----------|
| 6  | -0.239491 | 0.794850  | -0.886126 |
| 6  | 0.692084  | -0.169685 | -0.931334 |
| 6  | 0.760981  | -1.665029 | -0.575612 |
| 6  | 2.007365  | -2.106197 | -1.374324 |
| 6  | 0.891518  | -1.837361 | 0.945573  |
| 1  | -0.000909 | -1.445741 | 1.436938  |
| 1  | 0.982515  | -2.897943 | 1.190317  |
| 1  | 1.757427  | -1.299797 | 1.337045  |
| 6  | 2.866674  | -3.235758 | -0.832995 |
| 1  | 3.698015  | -3.440426 | -1.512757 |
| 1  | 2.266303  | -4.147404 | -0.751016 |
| 8  | -0.320621 | -2.440193 | -1.073487 |
| 1  | -1.136628 | -2.214015 | -0.602006 |
| 53 | -2.229647 | 0.273664  | -0.158334 |
| 1  | 1.653862  | -2.356694 | -2.375267 |
| 1  | 3.287548  | -3.005351 | 0.147085  |
| 16 | 2.853807  | -0.460782 | -1.530247 |
| 1  | 3.830705  | -0.053315 | 0.311334  |
| 8  | 4.193129  | 0.327626  | 1.177083  |
| 8  | -4.622723 | -0.174630 | 0.672218  |

S36

|   |           |           |           |
|---|-----------|-----------|-----------|
| 7 | 5.395048  | -0.293758 | 1.433673  |
| 7 | -4.958928 | -1.382377 | 0.983557  |
| 8 | 5.751195  | -1.166277 | 0.665417  |
| 8 | 5.966565  | 0.107295  | 2.417815  |
| 8 | -6.112342 | -1.584975 | 1.387171  |
| 8 | -4.120446 | -2.297305 | 0.869635  |
| 6 | -0.010989 | 2.229045  | -1.292811 |
| 1 | 0.926741  | 2.282538  | -1.857392 |
| 1 | -0.815719 | 2.535291  | -1.971058 |
| 6 | 0.048152  | 3.206173  | -0.105849 |
| 1 | 0.864211  | 2.905375  | 0.561245  |
| 1 | -0.875842 | 3.125468  | 0.476005  |
| 6 | 0.251298  | 4.659963  | -0.546408 |
| 1 | 1.171952  | 4.736254  | -1.138437 |
| 1 | -0.567519 | 4.951384  | -1.215787 |
| 6 | 0.319895  | 5.638285  | 0.630319  |
| 1 | 1.149355  | 5.391296  | 1.300575  |
| 1 | 0.463521  | 6.667678  | 0.287780  |
| 1 | -0.600988 | 5.608592  | 1.221033  |

39

Bu-NO3 RC=3.6

|    |           |           |           |
|----|-----------|-----------|-----------|
| 6  | -0.294583 | 0.842419  | -0.913269 |
| 6  | 0.653162  | -0.072385 | -0.956166 |
| 6  | 0.913909  | -1.548368 | -0.646222 |
| 6  | 2.144826  | -1.895878 | -1.505379 |
| 6  | 1.123174  | -1.718647 | 0.867308  |
| 1  | 0.223048  | -1.407550 | 1.401267  |
| 1  | 1.314489  | -2.769291 | 1.093859  |
| 1  | 1.957121  | -1.112549 | 1.223881  |
| 6  | 2.992853  | -3.081383 | -1.069838 |
| 1  | 3.783095  | -3.264264 | -1.802843 |
| 1  | 2.371334  | -3.980856 | -1.010405 |
| 8  | -0.133437 | -2.399735 | -1.099330 |
| 1  | -0.937314 | -2.242365 | -0.582441 |
| 53 | -2.268028 | 0.168390  | -0.158253 |
| 1  | 1.758726  | -2.075757 | -2.509977 |
| 1  | 3.471577  | -2.915467 | -0.103520 |
| 16 | 3.055759  | -0.282499 | -1.598660 |
| 1  | 3.952876  | 0.083944  | 0.246914  |
| 8  | 4.317397  | 0.499566  | 1.105204  |
| 8  | -4.585488 | -0.342171 | 0.657050  |
| 7  | 5.339265  | -0.293023 | 1.565701  |
| 7  | -4.880444 | -1.556097 | 1.014128  |
| 8  | 5.568002  | -1.325762 | 0.964690  |
| 8  | 5.905526  | 0.133038  | 2.544369  |
| 8  | -6.029498 | -1.774298 | 1.412951  |
| 8  | -4.009930 | -2.438922 | 0.942796  |
| 6  | -0.177151 | 2.296430  | -1.292522 |
| 1  | 0.740585  | 2.421577  | -1.876614 |
| 1  | -1.019003 | 2.557669  | -1.943123 |
| 6  | -0.153460 | 3.245757  | -0.082732 |
| 1  | 0.698802  | 2.985353  | 0.554964  |
| 1  | -1.054407 | 3.089747  | 0.519566  |
| 6  | -0.059805 | 4.719270  | -0.493878 |
| 1  | 0.837757  | 4.870082  | -1.106416 |
| 1  | -0.913791 | 4.969833  | -1.135280 |
| 6  | -0.025320 | 5.673141  | 0.704161  |
| 1  | 0.836504  | 5.467643  | 1.346912  |
| 1  | 0.040086  | 6.717135  | 0.382819  |
| 1  | -0.926087 | 5.568419  | 1.316964  |

39

Bu-NO3 RC=3.8

|   |           |           |           |
|---|-----------|-----------|-----------|
| 6 | -0.359269 | 0.900678  | -0.917713 |
| 6 | 0.589014  | 0.022278  | -0.942252 |
| 6 | 1.044632  | -1.404527 | -0.683824 |
| 6 | 2.263883  | -1.648085 | -1.593368 |
| 6 | 1.320333  | -1.571812 | 0.819773  |
| 1 | 0.412829  | -1.359613 | 1.389424  |
| 1 | 1.623662  | -2.600424 | 1.020973  |

S37

|               |           |           |           |
|---------------|-----------|-----------|-----------|
| 1             | 2.101949  | -0.889597 | 1.154176  |
| 6             | 3.089160  | -2.888809 | -1.275236 |
| 1             | 3.848048  | -3.030704 | -2.049130 |
| 1             | 2.446851  | -3.775639 | -1.258772 |
| 8             | 0.050738  | -2.338228 | -1.110598 |
| 1             | -0.740431 | -2.255523 | -0.559192 |
| 53            | -2.322661 | 0.060701  | -0.151865 |
| 1             | 1.850855  | -1.745171 | -2.599192 |
| 1             | 3.608405  | -2.803210 | -0.319381 |
| 16            | 3.247870  | -0.075739 | -1.607025 |
| 1             | 4.103763  | 0.174013  | 0.218946  |
| 8             | 4.480266  | 0.555770  | 1.101721  |
| 8             | -4.566462 | -0.515162 | 0.617869  |
| 7             | 5.400723  | -0.318961 | 1.609282  |
| 7             | -4.820518 | -1.740938 | 1.000026  |
| 8             | 5.553358  | -1.381883 | 1.035733  |
| 8             | 5.972349  | 0.066990  | 2.604131  |
| 8             | -5.968317 | -1.982594 | 1.377321  |
| 8             | -3.916640 | -2.584806 | 0.966649  |
| 6             | -0.362774 | 2.364270  | -1.265678 |
| 1             | 0.529674  | 2.565112  | -1.866569 |
| 1             | -1.237590 | 2.573870  | -1.889943 |
| 6             | -0.377139 | 3.283036  | -0.032784 |
| 1             | 0.507640  | 3.069736  | 0.576943  |
| 1             | -1.249493 | 3.048769  | 0.585981  |
| 6             | -0.399043 | 4.768128  | -0.411110 |
| 1             | 0.469774  | 4.995879  | -1.040788 |
| 1             | -1.284830 | 4.971441  | -1.025515 |
| 6             | -0.401258 | 5.694511  | 0.808711  |
| 1             | 0.489251  | 5.536472  | 1.425111  |
| 1             | -0.417826 | 6.747285  | 0.510978  |
| 1             | -1.276403 | 5.512553  | 1.440302  |
| 39            |           |           |           |
| Bu-NO3 RC=4.0 |           |           |           |
| 6             | -0.423876 | 0.994293  | -0.918964 |
| 6             | 0.517750  | 0.142084  | -0.925167 |
| 6             | 1.162463  | -1.208764 | -0.736182 |
| 6             | 2.377633  | -1.323199 | -1.685793 |
| 6             | 1.492799  | -1.394357 | 0.753755  |
| 1             | 0.580913  | -1.319684 | 1.351396  |
| 1             | 1.929650  | -2.381744 | 0.907442  |
| 1             | 2.192018  | -0.631040 | 1.093515  |
| 6             | 3.173584  | -2.615240 | -1.517597 |
| 1             | 3.910067  | -2.685124 | -2.322174 |
| 1             | 2.513024  | -3.486593 | -1.575116 |
| 8             | 0.245476  | -2.223521 | -1.171712 |
| 1             | -0.529335 | -2.235012 | -0.593015 |
| 53            | -2.364945 | -0.059549 | -0.143623 |
| 1             | 1.945243  | -1.309501 | -2.688569 |
| 1             | 3.720881  | -2.636417 | -0.573877 |
| 16            | 3.439741  | 0.195094  | -1.577554 |
| 1             | 4.255034  | 0.262627  | 0.216822  |
| 8             | 4.652602  | 0.572482  | 1.137554  |
| 8             | -4.519463 | -0.731407 | 0.575293  |
| 7             | 5.468473  | -0.393626 | 1.640457  |
| 7             | -4.712899 | -1.978657 | 0.964800  |
| 8             | 5.526165  | -1.460426 | 1.054042  |
| 8             | 6.062331  | -0.086349 | 2.652873  |
| 8             | -5.852414 | -2.264757 | 1.321941  |
| 8             | -3.766813 | -2.767426 | 0.950065  |
| 6             | -0.581735 | 2.454067  | -1.217309 |
| 1             | 0.269982  | 2.753133  | -1.836000 |
| 1             | -1.490568 | 2.598088  | -1.809772 |
| 6             | -0.640899 | 3.328193  | 0.046422  |
| 1             | 0.278263  | 3.177664  | 0.622515  |
| 1             | -1.469017 | 2.995506  | 0.680632  |
| 6             | -0.809301 | 4.815544  | -0.282632 |
| 1             | 0.016280  | 5.140904  | -0.927210 |
| 1             | -1.727838 | 4.955333  | -0.865888 |
| 6             | -0.859266 | 5.699741  | 0.967034  |

S38

|   |           |          |          |
|---|-----------|----------|----------|
| 1 | 0.059865  | 5.605160 | 1.553539 |
| 1 | -0.979985 | 6.755003 | 0.704636 |
| 1 | -1.695269 | 5.419353 | 1.615379 |

39

Bu-NO3 RC=4.2

|    |           |           |           |
|----|-----------|-----------|-----------|
| 6  | -0.518548 | 1.196018  | -0.916947 |
| 6  | 0.410382  | 0.364443  | -0.919065 |
| 6  | 1.263204  | -0.865996 | -0.871001 |
| 6  | 2.503722  | -0.716943 | -1.812348 |
| 6  | 1.620714  | -1.178001 | 0.589525  |
| 1  | 0.712551  | -1.347701 | 1.174348  |
| 1  | 2.235751  | -2.077219 | 0.626999  |
| 1  | 2.172390  | -0.349060 | 1.031215  |
| 6  | 3.284097  | -2.029172 | -1.937271 |
| 1  | 4.038840  | -1.901325 | -2.716949 |
| 1  | 2.629373  | -2.861211 | -2.212101 |
| 8  | 0.490548  | -1.940216 | -1.442522 |
| 1  | -0.260849 | -2.133575 | -0.866805 |
| 53 | -2.341202 | -0.231118 | -0.086882 |
| 1  | 2.079270  | -0.478503 | -2.790551 |
| 1  | 3.813029  | -2.270753 | -1.014214 |
| 16 | 3.625544  | 0.702557  | -1.389162 |
| 1  | 4.364285  | 0.378101  | 0.307986  |
| 8  | 4.798411  | 0.494657  | 1.294729  |
| 8  | -4.327937 | -1.085026 | 0.636300  |
| 7  | 5.459184  | -0.617757 | 1.677116  |
| 7  | -4.441628 | -2.405776 | 0.821167  |
| 8  | 5.339077  | -1.628210 | 1.000476  |
| 8  | 6.120583  | -0.509585 | 2.693578  |
| 8  | -5.542970 | -2.787227 | 1.189301  |
| 8  | -3.468590 | -3.122604 | 0.617821  |
| 6  | -0.934803 | 2.607174  | -1.121932 |
| 1  | -0.189227 | 3.064565  | -1.780632 |
| 1  | -1.894618 | 2.629728  | -1.646718 |
| 6  | -1.033660 | 3.408640  | 0.187856  |
| 1  | -0.063454 | 3.375910  | 0.693951  |
| 1  | -1.754822 | 2.925360  | 0.854945  |
| 6  | -1.447409 | 4.864278  | -0.052638 |
| 1  | -0.727293 | 5.339268  | -0.729882 |
| 1  | -2.415197 | 4.885625  | -0.568808 |
| 6  | -1.541768 | 5.676875  | 1.242168  |
| 1  | -0.580071 | 5.699765  | 1.763792  |
| 1  | -1.837634 | 6.711021  | 1.042925  |
| 1  | -2.278793 | 5.244908  | 1.926294  |

39

Bu-NO3 RC=4.4

|    |           |           |           |
|----|-----------|-----------|-----------|
| 6  | -0.743513 | 1.368376  | -0.784400 |
| 6  | 0.329814  | 0.770549  | -0.754734 |
| 6  | 1.616481  | 0.017169  | -0.861492 |
| 6  | 2.765216  | 0.963698  | -1.420512 |
| 6  | 1.989690  | -0.651965 | 0.464719  |
| 1  | 1.231874  | -1.393687 | 0.735238  |
| 1  | 2.965352  | -1.137830 | 0.377592  |
| 1  | 2.047181  | 0.086752  | 1.263677  |
| 6  | 3.848394  | 0.156594  | -2.150675 |
| 1  | 4.590319  | 0.856925  | -2.539835 |
| 1  | 3.423478  | -0.411393 | -2.978940 |
| 8  | 1.400621  | -0.970600 | -1.888143 |
| 1  | 1.020782  | -1.752819 | -1.472758 |
| 53 | -1.896277 | -0.918316 | -0.206997 |
| 1  | 2.295514  | 1.649023  | -2.130904 |
| 1  | 4.354765  | -0.531167 | -1.469588 |
| 16 | 3.552890  | 2.096662  | -0.175701 |
| 1  | 4.320007  | 1.155058  | 0.477158  |
| 8  | 5.421137  | 0.130409  | 1.572323  |
| 8  | -3.194841 | -2.636725 | 0.191962  |
| 7  | 5.767256  | -1.065378 | 1.310637  |
| 7  | -4.510190 | -2.415963 | 0.448877  |
| 8  | 5.139518  | -1.706558 | 0.423929  |

S39

|   |           |           |           |
|---|-----------|-----------|-----------|
| 8 | 6.710348  | -1.586980 | 1.928462  |
| 8 | -5.154754 | -3.425834 | 0.654222  |
| 8 | -4.927694 | -1.269063 | 0.452564  |
| 6 | -1.759989 | 2.428492  | -0.867387 |
| 1 | -1.307783 | 3.261249  | -1.419146 |
| 1 | -2.605932 | 2.075490  | -1.465647 |
| 6 | -2.257008 | 2.922786  | 0.504263  |
| 1 | -1.398236 | 3.269364  | 1.088304  |
| 1 | -2.692397 | 2.081448  | 1.051904  |
| 6 | -3.291134 | 4.045634  | 0.375253  |
| 1 | -2.853524 | 4.881762  | -0.184288 |
| 1 | -4.140405 | 3.688084  | -0.219425 |
| 6 | -3.794324 | 4.547243  | 1.731848  |
| 1 | -2.971635 | 4.938779  | 2.338095  |
| 1 | -4.530145 | 5.347437  | 1.611667  |
| 1 | -4.268682 | 3.740404  | 2.298479  |

39

Bu-NO3 RC=4.6

|    |           |           |           |
|----|-----------|-----------|-----------|
| 6  | -0.816181 | 1.382368  | -0.730449 |
| 6  | 0.289919  | 0.850934  | -0.620614 |
| 6  | 1.641684  | 0.223707  | -0.741042 |
| 6  | 2.751677  | 1.369192  | -0.913000 |
| 6  | 1.959523  | -0.744418 | 0.397477  |
| 1  | 1.250966  | -1.573042 | 0.376385  |
| 1  | 2.972438  | -1.131464 | 0.260441  |
| 1  | 1.903658  | -0.235977 | 1.358764  |
| 6  | 3.860397  | 0.933250  | -1.884419 |
| 1  | 4.596926  | 1.736030  | -1.947534 |
| 1  | 3.479583  | 0.745271  | -2.892969 |
| 8  | 1.574127  | -0.595273 | -1.924423 |
| 1  | 1.455144  | -0.025835 | -2.692372 |
| 53 | -1.882076 | -0.985865 | -0.117839 |
| 1  | 2.247291  | 2.250614  | -1.320954 |
| 1  | 4.361922  | 0.031769  | -1.526263 |
| 16 | 3.524621  | 2.020739  | 0.651544  |
| 1  | 4.443330  | 1.006506  | 0.859149  |
| 8  | 5.830784  | -0.057717 | 1.379483  |
| 8  | -3.150152 | -2.691458 | 0.345451  |
| 7  | 6.035298  | -1.179049 | 0.812124  |
| 7  | -4.501915 | -2.530530 | 0.318414  |
| 8  | 5.222477  | -1.579936 | -0.063407 |
| 8  | 7.026977  | -1.858396 | 1.125280  |
| 8  | -5.124706 | -3.536491 | 0.594269  |
| 8  | -4.963489 | -1.438548 | 0.032681  |
| 6  | -1.919558 | 2.336898  | -0.913432 |
| 1  | -1.528510 | 3.175063  | -1.503096 |
| 1  | -2.708061 | 1.869434  | -1.511429 |
| 6  | -2.510666 | 2.865837  | 0.407538  |
| 1  | -1.710737 | 3.329922  | 0.993828  |
| 1  | -2.882375 | 2.020977  | 0.994839  |
| 6  | -3.642102 | 3.871872  | 0.174517  |
| 1  | -3.268400 | 4.708167  | -0.429604 |
| 1  | -4.433247 | 3.394636  | -0.416057 |
| 6  | -4.235178 | 4.410552  | 1.479607  |
| 1  | -3.474265 | 4.919974  | 2.079017  |
| 1  | -5.040095 | 5.125033  | 1.285248  |
| 1  | -4.648390 | 3.600402  | 2.087812  |

39

Bu-NO3 RC=4.8

|   |           |           |           |
|---|-----------|-----------|-----------|
| 6 | -0.647838 | 1.413703  | -0.561497 |
| 6 | 0.351803  | 0.766034  | -0.284815 |
| 6 | 1.736133  | 0.370998  | 0.070961  |
| 6 | 2.558558  | 1.671656  | -0.380226 |
| 6 | 1.803074  | 0.066613  | 1.577963  |
| 1 | 1.105133  | -0.742971 | 1.800064  |
| 1 | 2.812698  | -0.260360 | 1.828798  |
| 1 | 1.555445  | 0.941702  | 2.181680  |
| 6 | 3.021521  | 1.561816  | -1.835226 |
| 1 | 3.441552  | 2.517920  | -2.155324 |

S40

|    |           |           |           |
|----|-----------|-----------|-----------|
| 1  | 2.184938  | 1.301743  | -2.491103 |
| 8  | 2.061828  | -0.765116 | -0.685640 |
| 1  | 3.023284  | -0.992176 | -0.586421 |
| 53 | -1.677983 | -1.012435 | -0.146181 |
| 1  | 1.879359  | 2.522951  | -0.294049 |
| 1  | 3.785012  | 0.790947  | -1.944684 |
| 16 | 3.902566  | 2.187814  | 0.755532  |
| 1  | 4.577065  | 0.999817  | 0.817080  |
| 8  | 5.274053  | -0.757521 | 1.167465  |
| 8  | -2.955304 | -2.800776 | 0.061521  |
| 7  | 5.499907  | -1.470816 | 0.146878  |
| 7  | -4.289801 | -2.637122 | 0.190379  |
| 8  | 4.651436  | -1.466998 | -0.802148 |
| 8  | 6.524089  | -2.156050 | 0.062706  |
| 8  | -4.917726 | -3.672690 | 0.318113  |
| 8  | -4.755978 | -1.506555 | 0.167802  |
| 6  | -1.687901 | 2.374321  | -0.936567 |
| 1  | -1.175441 | 3.264169  | -1.325617 |
| 1  | -2.271087 | 1.964452  | -1.768058 |
| 6  | -2.627331 | 2.776552  | 0.215977  |
| 1  | -2.029307 | 3.185335  | 1.037614  |
| 1  | -3.121612 | 1.879944  | 0.600978  |
| 6  | -3.679043 | 3.799876  | -0.223479 |
| 1  | -3.178541 | 4.692269  | -0.620005 |
| 1  | -4.264173 | 3.382025  | -1.051468 |
| 6  | -4.623021 | 4.205273  | 0.912176  |
| 1  | -4.071000 | 4.654816  | 1.743613  |
| 1  | -5.364321 | 4.933914  | 0.571937  |
| 1  | -5.162627 | 3.337680  | 1.303125  |

39

Bu-NO3 RC=5.0

|    |           |           |           |
|----|-----------|-----------|-----------|
| 6  | -0.685536 | 1.436926  | -0.535348 |
| 6  | 0.352661  | 0.880967  | -0.205757 |
| 6  | 1.730481  | 0.476311  | 0.178689  |
| 6  | 2.582219  | 1.785444  | -0.148548 |
| 6  | 1.754002  | 0.085202  | 1.666822  |
| 1  | 1.038990  | -0.722533 | 1.832119  |
| 1  | 2.751804  | -0.271019 | 1.922580  |
| 1  | 1.507400  | 0.931632  | 2.311935  |
| 6  | 2.932600  | 1.864947  | -1.636963 |
| 1  | 3.378395  | 2.837450  | -1.856460 |
| 1  | 2.039511  | 1.735555  | -2.256994 |
| 8  | 2.065098  | -0.614950 | -0.639882 |
| 1  | 3.035652  | -0.825041 | -0.606878 |
| 53 | -1.655679 | -1.008777 | -0.109749 |
| 1  | 1.955699  | 2.641207  | 0.117539  |
| 1  | 3.646416  | 1.086876  | -1.908958 |
| 16 | 4.053727  | 2.068498  | 0.927696  |
| 1  | 4.629738  | 0.829299  | 0.834176  |
| 8  | 5.331293  | -0.920101 | 1.038457  |
| 8  | -2.878259 | -2.824136 | 0.088570  |
| 7  | 5.490993  | -1.495206 | -0.077367 |
| 7  | -4.223291 | -2.700365 | 0.174933  |
| 8  | 4.623295  | -1.306119 | -0.989664 |
| 8  | 6.468058  | -2.220541 | -0.287252 |
| 8  | -4.818753 | -3.754373 | 0.301387  |
| 8  | -4.723436 | -1.586645 | 0.119465  |
| 6  | -1.757721 | 2.338013  | -0.970744 |
| 1  | -1.276105 | 3.230906  | -1.389724 |
| 1  | -2.309618 | 1.868042  | -1.791431 |
| 6  | -2.733293 | 2.748996  | 0.148029  |
| 1  | -2.167801 | 3.219802  | 0.959567  |
| 1  | -3.195259 | 1.849684  | 0.565583  |
| 6  | -3.820793 | 3.704608  | -0.352725 |
| 1  | -3.352671 | 4.599299  | -0.782263 |
| 1  | -4.373464 | 3.224684  | -1.169209 |
| 6  | -4.800112 | 4.119010  | 0.749247  |
| 1  | -4.281885 | 4.629014  | 1.567500  |
| 1  | -5.566285 | 4.798649  | 0.365433  |
| 1  | -5.308507 | 3.247093  | 1.171227  |



S41

39  
Bu-NO3 RC=5.2

|    |           |           |           |
|----|-----------|-----------|-----------|
| 6  | 0.515160  | 0.626798  | -0.846780 |
| 6  | 0.587718  | -0.593688 | -0.709026 |
| 6  | 1.329622  | -1.893347 | -0.620233 |
| 6  | 1.458139  | -2.258857 | 0.900709  |
| 6  | 0.599676  | -2.979670 | -1.421424 |
| 1  | 0.457268  | -2.633726 | -2.446520 |
| 1  | 1.215358  | -3.877627 | -1.432585 |
| 1  | -0.372064 | -3.217897 | -0.985920 |
| 6  | 2.020683  | -1.139800 | 1.780043  |
| 1  | 2.127313  | -1.499957 | 2.804569  |
| 1  | 1.351097  | -0.276145 | 1.792112  |
| 8  | 2.595893  | -1.730735 | -1.221182 |
| 1  | 2.977883  | -0.825559 | -1.070437 |
| 53 | -1.869293 | -0.450674 | -0.175441 |
| 1  | 0.466027  | -2.546249 | 1.259835  |
| 1  | 3.002094  | -0.807076 | 1.433561  |
| 16 | 2.453386  | -3.793875 | 1.087368  |
| 1  | 3.531049  | -3.322226 | 0.427286  |
| 8  | 4.718490  | 0.799855  | 0.593864  |
| 8  | -4.012070 | -0.916062 | 0.388399  |
| 7  | 4.000913  | 1.436155  | -0.197578 |
| 7  | -4.948166 | 0.028480  | 0.235908  |
| 8  | 3.384111  | 0.810526  | -1.134167 |
| 8  | 3.848476  | 2.670557  | -0.107541 |
| 8  | -6.083217 | -0.305933 | 0.540359  |
| 8  | -4.616586 | 1.131737  | -0.183831 |
| 6  | 0.530674  | 2.066025  | -1.041075 |
| 1  | 1.528470  | 2.261038  | -1.458901 |
| 1  | -0.213799 | 2.342379  | -1.796376 |
| 6  | 0.346493  | 2.893960  | 0.244985  |
| 1  | 1.104409  | 2.584433  | 0.969766  |
| 1  | -0.635844 | 2.682914  | 0.680905  |
| 6  | 0.492271  | 4.394022  | -0.026169 |
| 1  | 1.483089  | 4.576852  | -0.454542 |
| 1  | -0.244172 | 4.702384  | -0.779431 |
| 6  | 0.315435  | 5.240675  | 1.237372  |
| 1  | 1.064420  | 4.977768  | 1.990334  |
| 1  | 0.424396  | 6.307201  | 1.018759  |
| 1  | -0.673854 | 5.090481  | 1.682128  |

39  
Bu-NO3 RC=5.4

|    |           |           |           |
|----|-----------|-----------|-----------|
| 6  | 0.461744  | 0.701663  | -0.903425 |
| 6  | 0.642614  | -0.503096 | -0.702831 |
| 6  | 1.367481  | -1.834686 | -0.706366 |
| 6  | 1.434876  | -2.422721 | 0.752864  |
| 6  | 0.646260  | -2.786245 | -1.673248 |
| 1  | 0.567104  | -2.312414 | -2.652784 |
| 1  | 1.235909  | -3.697456 | -1.765431 |
| 1  | -0.352650 | -3.043000 | -1.315931 |
| 6  | 2.038197  | -1.449759 | 1.765196  |
| 1  | 2.082180  | -1.913993 | 2.751661  |
| 1  | 1.424876  | -0.546730 | 1.840598  |
| 8  | 2.661253  | -1.624706 | -1.226668 |
| 1  | 3.021965  | -0.723223 | -1.006140 |
| 53 | -1.828727 | -0.378403 | -0.081812 |
| 1  | 0.418052  | -2.688445 | 1.054477  |
| 1  | 3.047390  | -1.143654 | 1.480477  |
| 16 | 2.324404  | -4.069080 | 0.808445  |
| 1  | 3.480173  | -3.600273 | 0.293660  |
| 8  | 4.630401  | 0.740636  | 0.819427  |
| 8  | -3.920482 | -0.865860 | 0.624970  |
| 7  | 3.961425  | 1.457197  | 0.053117  |
| 7  | -4.939490 | -0.083014 | 0.247303  |
| 8  | 3.374439  | 0.922763  | -0.956496 |
| 8  | 3.832553  | 2.682866  | 0.237833  |
| 8  | -6.041979 | -0.436567 | 0.636993  |
| 8  | -4.706877 | 0.905950  | -0.438661 |

S42

|   |           |          |           |
|---|-----------|----------|-----------|
| 6 | 0.460597  | 2.137335 | -1.140793 |
| 1 | 1.433465  | 2.321572 | -1.616301 |
| 1 | -0.327985 | 2.394330 | -1.856626 |
| 6 | 0.353720  | 2.996417 | 0.133589  |
| 1 | 1.171025  | 2.720205 | 0.804519  |
| 1 | -0.590562 | 2.779524 | 0.644371  |
| 6 | 0.447886  | 4.491345 | -0.184511 |
| 1 | 1.398112  | 4.682809 | -0.694278 |
| 1 | -0.351266 | 4.769723 | -0.883785 |
| 6 | 0.358905  | 5.365275 | 1.069688  |
| 1 | 1.171187  | 5.131285 | 1.763822  |
| 1 | 0.429741  | 6.428034 | 0.819058  |
| 1 | -0.588360 | 5.209253 | 1.596444  |

37

Ph-NO3 1ec

|    |           |           |           |
|----|-----------|-----------|-----------|
| 6  | 4.057764  | 4.052773  | 0.468290  |
| 6  | 3.484185  | 3.913152  | -0.795385 |
| 6  | 2.399315  | 3.063656  | -0.981526 |
| 6  | 1.871047  | 2.344839  | 0.104056  |
| 6  | 2.455373  | 2.488833  | 1.373770  |
| 6  | 3.541071  | 3.338371  | 1.549590  |
| 1  | 4.906640  | 4.712436  | 0.609382  |
| 1  | 3.884894  | 4.464177  | -1.638754 |
| 1  | 1.953157  | 2.946029  | -1.961527 |
| 1  | 2.054784  | 1.925910  | 2.207698  |
| 1  | 3.987566  | 3.440328  | 2.532127  |
| 6  | 0.738343  | 1.492800  | -0.080384 |
| 6  | -0.317149 | 0.891714  | -0.220006 |
| 6  | -1.734361 | 0.462763  | -0.387499 |
| 6  | -2.563975 | 1.790275  | -0.089346 |
| 6  | -1.935955 | -0.070290 | -1.817624 |
| 1  | -1.233586 | -0.886013 | -1.996602 |
| 1  | -2.951602 | -0.454333 | -1.910509 |
| 1  | -1.788403 | 0.712700  | -2.565371 |
| 6  | -2.697170 | 2.040103  | 1.415257  |
| 1  | -3.135350 | 3.025707  | 1.585345  |
| 1  | -1.719726 | 1.998820  | 1.906709  |
| 8  | -1.948403 | -0.545522 | 0.567306  |
| 1  | -2.912397 | -0.747990 | 0.698097  |
| 53 | 1.585738  | -1.159408 | -0.297972 |
| 1  | -2.006674 | 2.614858  | -0.541829 |
| 1  | -3.340032 | 1.290233  | 1.877153  |
| 16 | -4.190751 | 1.928452  | -0.958833 |
| 1  | -4.709795 | 0.699482  | -0.648332 |
| 8  | -5.413313 | -1.059524 | -0.567789 |
| 8  | 2.685441  | -3.007280 | -0.551229 |
| 7  | -5.395419 | -1.500355 | 0.617990  |
| 7  | 3.822355  | -3.207811 | 0.177143  |
| 8  | -4.412910 | -1.192478 | 1.367001  |
| 8  | -6.310221 | -2.208864 | 1.049606  |
| 8  | 4.366393  | -4.271188 | -0.047578 |
| 8  | 4.187883  | -2.345860 | 0.955078  |

37

Ph-NO3 1r

|   |           |           |           |
|---|-----------|-----------|-----------|
| 6 | 0.711173  | 4.860979  | -0.078118 |
| 6 | 0.133516  | 4.011939  | 0.864388  |
| 6 | 0.185818  | 2.631379  | 0.694597  |
| 6 | 0.814278  | 2.072046  | -0.427666 |
| 6 | 1.404407  | 2.936925  | -1.363117 |
| 6 | 1.347604  | 4.317095  | -1.193002 |
| 1 | 0.666331  | 5.936401  | 0.055161  |
| 1 | -0.361788 | 4.423185  | 1.736957  |
| 1 | -0.264355 | 1.980398  | 1.432200  |
| 1 | 1.898710  | 2.520366  | -2.232996 |
| 1 | 1.799069  | 4.968046  | -1.934037 |
| 6 | 0.875920  | 0.608632  | -0.615943 |
| 6 | -0.057555 | -0.343011 | -0.467244 |
| 6 | 0.433392  | -1.787225 | -0.642632 |
| 6 | 1.687736  | -1.692712 | -1.549367 |

S43

|    |           |           |           |
|----|-----------|-----------|-----------|
| 6  | 0.701770  | -2.408885 | 0.737380  |
| 1  | -0.214160 | -2.381471 | 1.330896  |
| 1  | 1.006037  | -3.451861 | 0.626356  |
| 1  | 1.476956  | -1.863233 | 1.282070  |
| 6  | 2.663361  | -2.860553 | -1.512230 |
| 1  | 3.468085  | -2.717397 | -2.237752 |
| 1  | 2.130151  | -3.778272 | -1.774414 |
| 8  | -0.473561 | -2.612794 | -1.372694 |
| 1  | -1.370908 | -2.447831 | -1.043816 |
| 53 | -2.123213 | -0.080661 | 0.017130  |
| 1  | 1.303929  | -1.569004 | -2.564072 |
| 1  | 3.118555  | -2.991651 | -0.529151 |
| 16 | 2.480246  | -0.072748 | -1.137015 |
| 1  | 3.633506  | -0.301143 | 0.703882  |
| 8  | 4.060435  | -0.288392 | 1.612770  |
| 8  | -4.668395 | 0.298008  | 0.635596  |
| 7  | 5.319359  | -0.839799 | 1.470233  |
| 7  | -5.483623 | -0.694769 | 0.670054  |
| 8  | 5.633004  | -1.232963 | 0.363808  |
| 8  | 5.969363  | -0.868002 | 2.484048  |
| 8  | -6.667042 | -0.486632 | 0.986532  |
| 8  | -5.066610 | -1.837376 | 0.386038  |

37

Ph-NO3 RSC=1.8

|    |           |           |           |
|----|-----------|-----------|-----------|
| 6  | 0.707506  | 4.849898  | -0.085397 |
| 6  | 0.141122  | 4.000906  | 0.863968  |
| 6  | 0.196097  | 2.620182  | 0.696139  |
| 6  | 0.815970  | 2.060777  | -0.430631 |
| 6  | 1.394919  | 2.925519  | -1.373017 |
| 6  | 1.335315  | 4.305908  | -1.205074 |
| 1  | 0.660424  | 5.925432  | 0.046201  |
| 1  | -0.347580 | 4.412326  | 1.740168  |
| 1  | -0.245403 | 1.969069  | 1.438902  |
| 1  | 1.882356  | 2.508974  | -2.246809 |
| 1  | 1.777701  | 4.956864  | -1.951563 |
| 6  | 0.881223  | 0.595896  | -0.616498 |
| 6  | -0.058351 | -0.350788 | -0.464161 |
| 6  | 0.429369  | -1.796443 | -0.635510 |
| 6  | 1.686016  | -1.703897 | -1.539026 |
| 6  | 0.693950  | -2.416309 | 0.746009  |
| 1  | -0.223098 | -2.386168 | 1.337646  |
| 1  | 0.996719  | -3.460017 | 0.637533  |
| 1  | 1.469112  | -1.871039 | 1.291258  |
| 6  | 2.666273  | -2.867301 | -1.493544 |
| 1  | 3.474426  | -2.722730 | -2.214968 |
| 1  | 2.138443  | -3.787997 | -1.756227 |
| 8  | -0.477305 | -2.621775 | -1.366243 |
| 1  | -1.375325 | -2.452412 | -1.041433 |
| 53 | -2.122497 | -0.080818 | 0.017577  |
| 1  | 1.305256  | -1.585495 | -2.555549 |
| 1  | 3.116312  | -2.994188 | -0.507527 |
| 16 | 2.469318  | -0.077872 | -1.130296 |
| 1  | 3.635520  | -0.298478 | 0.705939  |
| 8  | 4.066711  | -0.286282 | 1.612534  |
| 8  | -4.669269 | 0.308051  | 0.633182  |
| 7  | 5.332595  | -0.819083 | 1.459184  |
| 7  | -5.487806 | -0.681692 | 0.669120  |
| 8  | 5.645933  | -1.198650 | 0.347995  |
| 8  | 5.987913  | -0.846553 | 2.469528  |
| 8  | -6.671152 | -0.468887 | 0.983160  |
| 8  | -5.074280 | -1.826590 | 0.388833  |

37

Ph-NO3 RSC=2.0

|   |          |          |           |
|---|----------|----------|-----------|
| 6 | 0.718425 | 4.961749 | 0.000746  |
| 6 | 0.064989 | 4.107669 | 0.887522  |
| 6 | 0.101625 | 2.729713 | 0.695739  |
| 6 | 0.790325 | 2.178243 | -0.396603 |
| 6 | 1.455392 | 3.048422 | -1.276032 |
| 6 | 1.415047 | 4.425242 | -1.081692 |

S44

|    |           |           |           |
|----|-----------|-----------|-----------|
| 1  | 0.687104  | 6.035152  | 0.152705  |
| 1  | -0.476621 | 4.512736  | 1.735114  |
| 1  | -0.408089 | 2.075151  | 1.389863  |
| 1  | 1.998556  | 2.635153  | -2.117507 |
| 1  | 1.927925  | 5.080195  | -1.777827 |
| 6  | 0.825044  | 0.728954  | -0.610750 |
| 6  | -0.044930 | -0.271377 | -0.498760 |
| 6  | 0.482813  | -1.698718 | -0.712011 |
| 6  | 1.715428  | -1.578673 | -1.647787 |
| 6  | 0.789084  | -2.334634 | 0.653758  |
| 1  | -0.117722 | -2.342490 | 1.261864  |
| 1  | 1.119129  | -3.366701 | 0.519513  |
| 1  | 1.556687  | -1.776765 | 1.195465  |
| 6  | 2.651484  | -2.780965 | -1.689338 |
| 1  | 3.419633  | -2.644960 | -2.454821 |
| 1  | 2.073703  | -3.673501 | -1.943564 |
| 8  | -0.422694 | -2.530845 | -1.435916 |
| 1  | -1.312593 | -2.411922 | -1.069639 |
| 53 | -2.124524 | -0.085037 | 0.011757  |
| 1  | 1.303315  | -1.406366 | -2.643865 |
| 1  | 3.157052  | -2.947719 | -0.737007 |
| 16 | 2.584845  | -0.012627 | -1.205020 |
| 1  | 3.637974  | -0.295418 | 0.668541  |
| 8  | 4.040175  | -0.251186 | 1.590335  |
| 8  | -4.649807 | 0.196415  | 0.656291  |
| 7  | 5.175811  | -1.034597 | 1.574425  |
| 7  | -5.434485 | -0.823680 | 0.679218  |
| 8  | 5.434123  | -1.622039 | 0.541719  |
| 8  | 5.789616  | -1.046734 | 2.611451  |
| 8  | -6.619377 | -0.655681 | 1.009699  |
| 8  | -4.984713 | -1.946102 | 0.370687  |

37

Ph-NO3 RSC=2.2

|    |           |           |           |
|----|-----------|-----------|-----------|
| 6  | 0.723970  | 5.035962  | 0.059716  |
| 6  | 0.039142  | 4.185937  | 0.926435  |
| 6  | 0.055912  | 2.809473  | 0.723259  |
| 6  | 0.756072  | 2.258064  | -0.363656 |
| 6  | 1.452358  | 3.123592  | -1.223575 |
| 6  | 1.431869  | 4.497951  | -1.015379 |
| 1  | 0.709409  | 6.108178  | 0.222049  |
| 1  | -0.511374 | 4.592915  | 1.767318  |
| 1  | -0.480193 | 2.155938  | 1.398395  |
| 1  | 2.007952  | 2.703718  | -2.053209 |
| 1  | 1.970961  | 5.150833  | -1.693282 |
| 6  | 0.754528  | 0.821739  | -0.589508 |
| 6  | -0.046823 | -0.221026 | -0.512584 |
| 6  | 0.513160  | -1.635662 | -0.735356 |
| 6  | 1.733965  | -1.510397 | -1.690212 |
| 6  | 0.841395  | -2.261541 | 0.629944  |
| 1  | -0.060168 | -2.286431 | 1.245611  |
| 1  | 1.190216  | -3.286999 | 0.494435  |
| 1  | 1.601762  | -1.687080 | 1.163152  |
| 6  | 2.619711  | -2.750944 | -1.779475 |
| 1  | 3.363332  | -2.632886 | -2.571512 |
| 1  | 1.999048  | -3.617644 | -2.021518 |
| 8  | -0.388798 | -2.481638 | -1.446887 |
| 1  | -1.269946 | -2.402028 | -1.050916 |
| 53 | -2.146357 | -0.085372 | 0.003581  |
| 1  | 1.304559  | -1.306519 | -2.672799 |
| 1  | 3.154807  | -2.945708 | -0.848809 |
| 16 | 2.686885  | 0.001062  | -1.247143 |
| 1  | 3.682622  | -0.317159 | 0.623138  |
| 8  | 4.080359  | -0.261021 | 1.550420  |
| 8  | -4.643882 | 0.124931  | 0.642920  |
| 7  | 5.127334  | -1.154510 | 1.605187  |
| 7  | -5.402630 | -0.918329 | 0.676270  |
| 8  | 5.335652  | -1.834730 | 0.618916  |
| 8  | 5.727012  | -1.160302 | 2.651602  |
| 8  | -6.589655 | -0.773779 | 1.004765  |
| 8  | -4.923278 | -2.029764 | 0.380088  |

S45

37  
Ph-NO3 RSC=2.4

|    |           |           |           |
|----|-----------|-----------|-----------|
| 6  | 0.706927  | 5.087390  | 0.114911  |
| 6  | 0.133204  | 4.225929  | 1.048526  |
| 6  | 0.134427  | 2.851955  | 0.830290  |
| 6  | 0.703798  | 2.319796  | -0.340205 |
| 6  | 1.287505  | 3.196169  | -1.270672 |
| 6  | 1.285363  | 4.566770  | -1.044130 |
| 1  | 0.707027  | 6.157704  | 0.289856  |
| 1  | -0.317044 | 4.622455  | 1.951664  |
| 1  | -0.317126 | 2.183742  | 1.552107  |
| 1  | 1.748131  | 2.783075  | -2.159560 |
| 1  | 1.737487  | 5.231787  | -1.771777 |
| 6  | 0.671439  | 0.896918  | -0.574774 |
| 6  | -0.048903 | -0.187370 | -0.524274 |
| 6  | 0.545350  | -1.589251 | -0.739966 |
| 6  | 1.755456  | -1.462249 | -1.713397 |
| 6  | 0.896245  | -2.187675 | 0.631655  |
| 1  | 0.000381  | -2.224670 | 1.255369  |
| 1  | 1.266989  | -3.206539 | 0.506665  |
| 1  | 1.647909  | -1.588521 | 1.148645  |
| 6  | 2.596043  | -2.734613 | -1.834226 |
| 1  | 3.317620  | -2.634223 | -2.648476 |
| 1  | 1.941669  | -3.581033 | -2.058588 |
| 8  | -0.351553 | -2.457622 | -1.429835 |
| 1  | -1.221727 | -2.411889 | -1.006291 |
| 53 | -2.171757 | -0.087279 | -0.002886 |
| 1  | 1.309312  | -1.240937 | -2.684765 |
| 1  | 3.155424  | -2.946697 | -0.921715 |
| 16 | 2.780598  | 0.004523  | -1.292465 |
| 1  | 3.742112  | -0.327436 | 0.555615  |
| 8  | 4.141310  | -0.256043 | 1.487561  |
| 8  | -4.635621 | 0.060939  | 0.629584  |
| 7  | 5.112493  | -1.221382 | 1.607091  |
| 7  | -5.369919 | -1.004079 | 0.677584  |
| 8  | 5.274473  | -1.976891 | 0.667761  |
| 8  | 5.705046  | -1.210576 | 2.659112  |
| 8  | -6.558312 | -0.877866 | 1.002377  |
| 8  | -4.863311 | -2.105417 | 0.399504  |

37  
Ph-NO3 RSC=2.6

|    |           |           |           |
|----|-----------|-----------|-----------|
| 6  | 0.778398  | 5.147395  | 0.162860  |
| 6  | 1.026767  | 4.252121  | 1.204304  |
| 6  | 0.966167  | 2.882906  | 0.977522  |
| 6  | 0.653118  | 2.390406  | -0.302700 |
| 6  | 0.411075  | 3.300753  | -1.347544 |
| 6  | 0.469077  | 4.668225  | -1.111182 |
| 1  | 0.824625  | 6.215683  | 0.343800  |
| 1  | 1.264429  | 4.622793  | 2.195020  |
| 1  | 1.157404  | 2.181247  | 1.780010  |
| 1  | 0.176603  | 2.918703  | -2.333358 |
| 1  | 0.272637  | 5.363000  | -1.920075 |
| 6  | 0.575293  | 0.983671  | -0.536126 |
| 6  | -0.053665 | -0.139086 | -0.542856 |
| 6  | 0.555739  | -1.521002 | -0.827397 |
| 6  | 1.758510  | -1.353500 | -1.807716 |
| 6  | 0.919567  | -2.172361 | 0.515594  |
| 1  | 0.030069  | -2.242207 | 1.145823  |
| 1  | 1.297162  | -3.181568 | 0.344230  |
| 1  | 1.672459  | -1.589339 | 1.048037  |
| 6  | 2.546935  | -2.650922 | -2.018862 |
| 1  | 3.250647  | -2.527772 | -2.845174 |
| 1  | 1.859085  | -3.463007 | -2.269085 |
| 8  | -0.351254 | -2.357169 | -1.543715 |
| 1  | -1.202407 | -2.366751 | -1.081886 |
| 53 | -2.184890 | -0.080931 | 0.055206  |
| 1  | 1.301729  | -1.066522 | -2.757045 |
| 1  | 3.123361  | -2.926867 | -1.134334 |
| 16 | 2.860320  | 0.041226  | -1.342632 |

S46

|   |           |           |          |
|---|-----------|-----------|----------|
| 1 | 3.759726  | -0.382785 | 0.460629 |
| 8 | 4.147456  | -0.335519 | 1.409889 |
| 8 | -4.600122 | -0.019893 | 0.739526 |
| 7 | 5.041772  | -1.362023 | 1.569551 |
| 7 | -5.314748 | -1.104256 | 0.746670 |
| 8 | 5.170836  | -2.149269 | 0.651050 |
| 8 | 5.612947  | -1.372810 | 2.635501 |
| 8 | -6.500187 | -1.009116 | 1.086288 |
| 8 | -4.790241 | -2.180295 | 0.417793 |

37

Ph-NO3 RSC=2.8

|    |           |           |           |
|----|-----------|-----------|-----------|
| 6  | 0.813506  | 5.222896  | 0.221529  |
| 6  | 1.078995  | 4.319281  | 1.252444  |
| 6  | 0.976747  | 2.953582  | 1.026933  |
| 6  | 0.605652  | 2.471615  | -0.244021 |
| 6  | 0.344920  | 3.391479  | -1.278676 |
| 6  | 0.444813  | 4.755500  | -1.041390 |
| 1  | 0.893635  | 6.289185  | 0.402199  |
| 1  | 1.364238  | 4.682326  | 2.233293  |
| 1  | 1.184183  | 2.244553  | 1.818622  |
| 1  | 0.066153  | 3.017155  | -2.255711 |
| 1  | 0.236592  | 5.457531  | -1.840900 |
| 6  | 0.483378  | 1.077984  | -0.475654 |
| 6  | -0.059010 | -0.075548 | -0.533173 |
| 6  | 0.573005  | -1.444328 | -0.838238 |
| 6  | 1.772330  | -1.259945 | -1.823818 |
| 6  | 0.947065  | -2.101437 | 0.498696  |
| 1  | 0.058749  | -2.198319 | 1.127352  |
| 1  | 1.347517  | -3.099623 | 0.315777  |
| 1  | 1.687251  | -1.507695 | 1.036233  |
| 6  | 2.505986  | -2.580222 | -2.099403 |
| 1  | 3.199119  | -2.446384 | -2.932683 |
| 1  | 1.786680  | -3.358815 | -2.366481 |
| 8  | -0.331828 | -2.278623 | -1.558412 |
| 1  | -1.169148 | -2.329298 | -1.075413 |
| 53 | -2.223383 | -0.071849 | 0.062733  |
| 1  | 1.311480  | -0.922482 | -2.754699 |
| 1  | 3.090062  | -2.907116 | -1.237495 |
| 16 | 2.947656  | 0.064343  | -1.335807 |
| 1  | 3.818065  | -0.439676 | 0.419222  |
| 8  | 4.221001  | -0.426405 | 1.372804  |
| 8  | -4.605837 | -0.103999 | 0.716680  |
| 7  | 5.036691  | -1.511839 | 1.531440  |
| 7  | -5.279518 | -1.220413 | 0.715718  |
| 8  | 5.097953  | -2.317016 | 0.620727  |
| 8  | 5.619945  | -1.557434 | 2.591817  |
| 8  | -6.468364 | -1.164667 | 1.044283  |
| 8  | -4.710658 | -2.272132 | 0.391759  |

37

Ph-NO3 RSC=3.0

|   |           |           |           |
|---|-----------|-----------|-----------|
| 6 | 0.732533  | 5.312061  | 0.285798  |
| 6 | 0.998906  | 4.404631  | 1.313799  |
| 6 | 0.887891  | 3.040811  | 1.086337  |
| 6 | 0.508527  | 2.563702  | -0.185633 |
| 6 | 0.245035  | 3.488327  | -1.217151 |
| 6 | 0.353887  | 4.850500  | -0.976558 |
| 1 | 0.820425  | 6.377369  | 0.468470  |
| 1 | 1.293020  | 4.764318  | 2.293193  |
| 1 | 1.097739  | 2.328119  | 1.873926  |
| 1 | -0.040182 | 3.117698  | -2.193643 |
| 1 | 0.146562  | 5.556051  | -1.773096 |
| 6 | 0.379765  | 1.177588  | -0.419521 |
| 6 | -0.055039 | -0.007563 | -0.523571 |
| 6 | 0.614161  | -1.355574 | -0.844661 |
| 6 | 1.812793  | -1.140687 | -1.829970 |
| 6 | 1.000946  | -2.014506 | 0.487202  |
| 1 | 0.113070  | -2.150459 | 1.109548  |
| 1 | 1.438138  | -2.995174 | 0.294257  |
| 1 | 1.717903  | -1.401539 | 1.033924  |

S47

|    |           |           |           |
|----|-----------|-----------|-----------|
| 6  | 2.506916  | -2.469149 | -2.172523 |
| 1  | 3.197996  | -2.310400 | -3.002894 |
| 1  | 1.768301  | -3.218100 | -2.469007 |
| 8  | -0.276966 | -2.197711 | -1.572380 |
| 1  | -1.100620 | -2.295592 | -1.074284 |
| 53 | -2.254326 | -0.082540 | 0.066975  |
| 1  | 1.350633  | -0.753293 | -2.740856 |
| 1  | 3.090532  | -2.847225 | -1.331526 |
| 16 | 3.042828  | 0.121641  | -1.310065 |
| 1  | 3.892584  | -0.466383 | 0.390743  |
| 8  | 4.314638  | -0.495999 | 1.345621  |
| 8  | -4.603033 | -0.237550 | 0.686714  |
| 7  | 5.056834  | -1.630791 | 1.485644  |
| 7  | -5.214769 | -1.395005 | 0.677270  |
| 8  | 5.045824  | -2.439196 | 0.574839  |
| 8  | 5.659882  | -1.719661 | 2.533988  |
| 8  | -6.406201 | -1.399260 | 0.993062  |
| 8  | -4.584697 | -2.410283 | 0.359519  |

37

Ph-NO3 RSC=3.2

|    |           |           |           |
|----|-----------|-----------|-----------|
| 6  | 0.439051  | 5.424862  | 0.349880  |
| 6  | 0.761314  | 4.525324  | 1.369114  |
| 6  | 0.702850  | 3.159328  | 1.137684  |
| 6  | 0.322062  | 2.672196  | -0.130648 |
| 6  | 0.001064  | 3.589223  | -1.153396 |
| 6  | 0.057622  | 4.953525  | -0.908038 |
| 1  | 0.486226  | 6.492147  | 0.535902  |
| 1  | 1.059040  | 4.893346  | 2.344254  |
| 1  | 0.958077  | 2.452435  | 1.916955  |
| 1  | -0.286030 | 3.211045  | -2.126433 |
| 1  | -0.191811 | 5.653306  | -1.697485 |
| 6  | 0.252407  | 1.285797  | -0.370192 |
| 6  | -0.034525 | 0.069256  | -0.516782 |
| 6  | 0.695243  | -1.239676 | -0.859701 |
| 6  | 1.897301  | -0.960363 | -1.830734 |
| 6  | 1.096979  | -1.909945 | 0.461275  |
| 1  | 0.209320  | -2.113740 | 1.065415  |
| 1  | 1.594449  | -2.857429 | 0.249724  |
| 1  | 1.770211  | -1.271417 | 1.033337  |
| 6  | 2.579446  | -2.272616 | -2.256793 |
| 1  | 3.277066  | -2.061040 | -3.069560 |
| 1  | 1.839528  | -2.996737 | -2.605847 |
| 8  | -0.161891 | -2.095711 | -1.612669 |
| 1  | -0.971452 | -2.258630 | -1.109396 |
| 53 | -2.265288 | -0.138319 | 0.080960  |
| 1  | 1.436066  | -0.515568 | -2.715773 |
| 1  | 3.157191  | -2.707319 | -1.439556 |
| 16 | 3.151299  | 0.252340  | -1.246772 |
| 1  | 3.984008  | -0.437202 | 0.385589  |
| 8  | 4.426663  | -0.523481 | 1.338848  |
| 8  | -4.562097 | -0.470996 | 0.683599  |
| 7  | 5.113768  | -1.692296 | 1.434205  |
| 7  | -5.090865 | -1.673508 | 0.625601  |
| 8  | 5.035983  | -2.483670 | 0.510538  |
| 8  | 5.745015  | -1.834153 | 2.461664  |
| 8  | -6.276445 | -1.768766 | 0.940569  |
| 8  | -4.390679 | -2.624547 | 0.267664  |

37

Ph-NO3 RSC=3.4

|   |           |          |           |
|---|-----------|----------|-----------|
| 6 | -0.139330 | 5.521127 | 0.415187  |
| 6 | 0.300673  | 4.653457 | 1.417846  |
| 6 | 0.373542  | 3.289661 | 1.177248  |
| 6 | 0.008723  | 2.774329 | -0.084057 |
| 6 | -0.431645 | 3.658664 | -1.090311 |
| 6 | -0.505902 | 5.020702 | -0.835633 |
| 1 | -0.194623 | 6.586703 | 0.608564  |
| 1 | 0.588409  | 5.044705 | 2.386885  |
| 1 | 0.722267  | 2.607762 | 1.942368  |
| 1 | -0.706858 | 3.258790 | -2.058162 |

S48

|    |           |           |           |
|----|-----------|-----------|-----------|
| 1  | -0.845694 | 5.695904  | -1.612619 |
| 6  | 0.082067  | 1.389616  | -0.335310 |
| 6  | 0.011135  | 0.155335  | -0.518863 |
| 6  | 0.827822  | -1.085809 | -0.890248 |
| 6  | 2.034197  | -0.693382 | -1.823135 |
| 6  | 1.248413  | -1.783884 | 0.409151  |
| 1  | 0.366589  | -2.088773 | 0.978476  |
| 1  | 1.829565  | -2.674575 | 0.167154  |
| 1  | 1.854185  | -1.120787 | 1.026621  |
| 6  | 2.747811  | -1.952652 | -2.349006 |
| 1  | 3.458849  | -1.651999 | -3.120939 |
| 1  | 2.033214  | -2.657837 | -2.779420 |
| 8  | 0.032545  | -1.957099 | -1.695039 |
| 1  | -0.755677 | -2.215748 | -1.199032 |
| 53 | -2.246499 | -0.259472 | 0.102130  |
| 1  | 1.570768  | -0.188154 | -2.674227 |
| 1  | 3.317848  | -2.447041 | -1.560872 |
| 16 | 3.263189  | 0.492657  | -1.132760 |
| 1  | 4.088506  | -0.305556 | 0.408530  |
| 8  | 4.552212  | -0.458096 | 1.357737  |
| 8  | -4.452632 | -0.829272 | 0.698018  |
| 7  | 5.212431  | -1.640372 | 1.386759  |
| 7  | -4.868751 | -2.076908 | 0.561304  |
| 8  | 5.083217  | -2.399674 | 0.440494  |
| 8  | 5.879017  | -1.836354 | 2.384582  |
| 8  | -6.034508 | -2.295323 | 0.878551  |
| 8  | -4.087944 | -2.928667 | 0.136191  |

37

Ph-NO3 RSC=3.6

|    |           |           |           |
|----|-----------|-----------|-----------|
| 6  | 0.090070  | 5.280695  | 0.057504  |
| 6  | 0.817811  | 4.578300  | -0.903104 |
| 6  | 0.678802  | 3.199457  | -1.021996 |
| 6  | -0.194512 | 2.491864  | -0.178684 |
| 6  | -0.928407 | 3.209112  | 0.776391  |
| 6  | -0.781218 | 4.588521  | 0.896396  |
| 1  | 0.197845  | 6.356228  | 0.147657  |
| 1  | 1.495105  | 5.105671  | -1.566475 |
| 1  | 1.246667  | 2.656637  | -1.767055 |
| 1  | -1.615121 | 2.681953  | 1.426495  |
| 1  | -1.354366 | 5.122454  | 1.646644  |
| 6  | -0.315014 | 1.024849  | -0.308207 |
| 6  | 0.636883  | 0.173682  | -0.670502 |
| 6  | 0.856108  | -1.324314 | -0.923037 |
| 6  | 2.102439  | -1.362552 | -1.828823 |
| 6  | 1.029507  | -2.043648 | 0.425037  |
| 1  | 0.123729  | -1.931762 | 1.023618  |
| 1  | 1.198914  | -3.107898 | 0.250221  |
| 1  | 1.865392  | -1.630751 | 0.991353  |
| 6  | 2.919377  | -2.645571 | -1.847688 |
| 1  | 3.724929  | -2.564961 | -2.582361 |
| 1  | 2.280747  | -3.486667 | -2.136314 |
| 8  | -0.188705 | -1.924774 | -1.677707 |
| 1  | -0.995771 | -1.984622 | -1.145064 |
| 53 | -2.281014 | 0.071808  | 0.143925  |
| 1  | 1.739789  | -1.149719 | -2.835713 |
| 1  | 3.375926  | -2.861240 | -0.880586 |
| 16 | 3.033985  | 0.148057  | -1.295851 |
| 1  | 3.934438  | -0.236779 | 0.567121  |
| 8  | 4.303026  | -0.205146 | 1.514539  |
| 8  | -4.537406 | -0.814659 | 0.712442  |
| 7  | 5.320173  | -1.124227 | 1.604893  |
| 7  | -4.775235 | -2.081670 | 0.536304  |
| 8  | 5.540167  | -1.819846 | 0.631395  |
| 8  | 5.889973  | -1.140826 | 2.669609  |
| 8  | -5.898391 | -2.499364 | 0.832930  |
| 8  | -3.877903 | -2.810935 | 0.084035  |

37

Ph-NO3 RSC=3.8

|   |           |          |          |
|---|-----------|----------|----------|
| 6 | -0.313343 | 5.351187 | 0.162025 |
|---|-----------|----------|----------|



S49

|    |           |           |           |
|----|-----------|-----------|-----------|
| 6  | 0.649823  | 4.694130  | -0.605012 |
| 6  | 0.615689  | 3.311901  | -0.745282 |
| 6  | -0.389502 | 2.555127  | -0.116900 |
| 6  | -1.354356 | 3.223834  | 0.647441  |
| 6  | -1.312197 | 4.609208  | 0.787663  |
| 1  | -0.285465 | 6.430299  | 0.268204  |
| 1  | 1.433033  | 5.260029  | -1.097959 |
| 1  | 1.369320  | 2.801644  | -1.332439 |
| 1  | -2.138064 | 2.658278  | 1.134161  |
| 1  | -2.066859 | 5.106651  | 1.387077  |
| 6  | -0.390175 | 1.089744  | -0.275676 |
| 6  | 0.553725  | 0.264415  | -0.613798 |
| 6  | 0.988626  | -1.162546 | -0.919324 |
| 6  | 2.214477  | -1.054509 | -1.847226 |
| 6  | 1.252883  | -1.893735 | 0.408060  |
| 1  | 0.343169  | -1.910392 | 1.011838  |
| 1  | 1.549729  | -2.922897 | 0.199964  |
| 1  | 2.035869  | -1.397029 | 0.980926  |
| 6  | 3.018101  | -2.335954 | -2.030842 |
| 1  | 3.782658  | -2.180218 | -2.796449 |
| 1  | 2.362286  | -3.148083 | -2.361452 |
| 8  | -0.003121 | -1.853006 | -1.678578 |
| 1  | -0.789139 | -2.010581 | -1.136004 |
| 53 | -2.323594 | -0.068594 | 0.135312  |
| 1  | 1.810801  | -0.748692 | -2.814310 |
| 1  | 3.528990  | -2.636034 | -1.114726 |
| 16 | 3.216184  | 0.381304  | -1.241227 |
| 1  | 4.100586  | -0.126653 | 0.534200  |
| 8  | 4.496820  | -0.134695 | 1.483966  |
| 8  | -4.482881 | -1.028243 | 0.648534  |
| 7  | 5.401737  | -1.156851 | 1.577135  |
| 7  | -4.659631 | -2.317717 | 0.484557  |
| 8  | 5.519491  | -1.901762 | 0.621561  |
| 8  | 5.995518  | -1.213019 | 2.630001  |
| 8  | -5.773270 | -2.764984 | 0.756503  |
| 8  | -3.720383 | -3.008864 | 0.073816  |

37

Ph-NO3 RSC=4.0

|    |           |           |           |
|----|-----------|-----------|-----------|
| 6  | -0.755516 | 5.404768  | 0.300134  |
| 6  | 0.453665  | 4.802041  | -0.052140 |
| 6  | 0.529829  | 3.426575  | -0.229943 |
| 6  | -0.614404 | 2.625778  | -0.054214 |
| 6  | -1.823352 | 3.236054  | 0.299686  |
| 6  | -1.890392 | 4.616849  | 0.474126  |
| 1  | -0.810536 | 6.479280  | 0.437613  |
| 1  | 1.344524  | 5.405319  | -0.189042 |
| 1  | 1.466619  | 2.952932  | -0.503456 |
| 1  | -2.709918 | 2.631947  | 0.439286  |
| 1  | -2.835034 | 5.073510  | 0.748273  |
| 6  | -0.478623 | 1.181510  | -0.256313 |
| 6  | 0.429788  | 0.352636  | -0.565326 |
| 6  | 1.104589  | -0.942930 | -0.925592 |
| 6  | 2.318974  | -0.635681 | -1.840409 |
| 6  | 1.455795  | -1.700922 | 0.365288  |
| 1  | 0.549942  | -1.901621 | 0.942450  |
| 1  | 1.922603  | -2.652318 | 0.107936  |
| 1  | 2.137915  | -1.116595 | 0.981650  |
| 6  | 3.105314  | -1.881980 | -2.242388 |
| 1  | 3.838606  | -1.602539 | -3.003154 |
| 1  | 2.440651  | -2.643896 | -2.661804 |
| 8  | 0.211786  | -1.721255 | -1.736698 |
| 1  | -0.546922 | -2.003532 | -1.207984 |
| 53 | -2.352837 | -0.240523 | 0.141741  |
| 1  | 1.881068  | -0.198200 | -2.740250 |
| 1  | 3.656953  | -2.303402 | -1.400784 |
| 16 | 3.397849  | 0.684266  | -1.108197 |
| 1  | 4.257576  | -0.029694 | 0.509743  |
| 8  | 4.692478  | -0.141511 | 1.460368  |
| 8  | -4.382711 | -1.273649 | 0.631557  |
| 7  | 5.480578  | -1.249226 | 1.486805  |

## S50

|   |           |           |          |
|---|-----------|-----------|----------|
| 7 | -4.501486 | -2.580901 | 0.433493 |
| 8 | 5.474834  | -1.983800 | 0.513974 |
| 8 | 6.118305  | -1.400644 | 2.508218 |
| 8 | -5.597292 | -3.063913 | 0.692146 |
| 8 | -3.533267 | -3.213856 | 0.015294 |

37

Ph-NO3 RSC=4.2

|    |           |           |           |
|----|-----------|-----------|-----------|
| 6  | -1.540603 | 5.395775  | 0.452721  |
| 6  | -0.221218 | 4.970844  | 0.285804  |
| 6  | 0.064027  | 3.628995  | 0.066859  |
| 6  | -0.982626 | 2.687954  | 0.014978  |
| 6  | -2.303669 | 3.117911  | 0.185994  |
| 6  | -2.577204 | 4.466446  | 0.401364  |
| 1  | -1.757662 | 6.444600  | 0.623282  |
| 1  | 0.592321  | 5.686575  | 0.326628  |
| 1  | 1.086723  | 3.289892  | -0.063787 |
| 1  | -3.111694 | 2.398891  | 0.151855  |
| 1  | -3.604562 | 4.787950  | 0.531539  |
| 6  | -0.614453 | 1.305930  | -0.229106 |
| 6  | 0.297192  | 0.504039  | -0.512335 |
| 6  | 1.225563  | -0.583554 | -0.934656 |
| 6  | 2.439760  | 0.026234  | -1.734375 |
| 6  | 1.648722  | -1.418189 | 0.281888  |
| 1  | 0.776289  | -1.887476 | 0.744588  |
| 1  | 2.340670  | -2.197001 | -0.038848 |
| 1  | 2.142585  | -0.786789 | 1.019515  |
| 6  | 3.243561  | -1.073442 | -2.438978 |
| 1  | 3.981041  | -0.586356 | -3.081064 |
| 1  | 2.604272  | -1.713093 | -3.053134 |
| 8  | 0.515413  | -1.396821 | -1.889695 |
| 1  | -0.193225 | -1.869707 | -1.434563 |
| 53 | -2.280102 | -0.500022 | 0.168688  |
| 1  | 1.979948  | 0.653770  | -2.501783 |
| 1  | 3.793641  | -1.686358 | -1.723862 |
| 16 | 3.549545  | 1.148692  | -0.754847 |
| 1  | 4.381356  | 0.138775  | 0.571847  |
| 8  | 4.896825  | -0.165625 | 1.484489  |
| 8  | -4.109262 | -1.714826 | 0.668427  |
| 7  | 5.511907  | -1.353945 | 1.336535  |
| 7  | -4.161383 | -2.999784 | 0.277888  |
| 8  | 5.258991  | -2.022528 | 0.343882  |
| 8  | 6.273368  | -1.667498 | 2.234133  |
| 8  | -5.199625 | -3.580018 | 0.549181  |
| 8  | -3.196586 | -3.483826 | -0.300051 |

37

Ph-NO3 RSC=4.4

|   |           |           |           |
|---|-----------|-----------|-----------|
| 6 | -3.955716 | 4.133311  | -0.244400 |
| 6 | -3.144471 | 4.081135  | 0.888796  |
| 6 | -2.075911 | 3.192983  | 0.944771  |
| 6 | -1.804621 | 2.346630  | -0.143653 |
| 6 | -2.626867 | 2.403307  | -1.281481 |
| 6 | -3.694283 | 3.291944  | -1.326415 |
| 1 | -4.790999 | 4.823605  | -0.283027 |
| 1 | -3.345294 | 4.731688  | 1.732548  |
| 1 | -1.443303 | 3.145126  | 1.822625  |
| 1 | -2.424910 | 1.741720  | -2.114709 |
| 1 | -4.326109 | 3.325556  | -2.206661 |
| 6 | -0.686178 | 1.457728  | -0.093080 |
| 6 | 0.365192  | 0.833050  | -0.064335 |
| 6 | 1.783404  | 0.390618  | -0.058972 |
| 6 | 2.618028  | 1.729058  | -0.425738 |
| 6 | 2.126167  | -0.226909 | 1.309424  |
| 1 | 1.543725  | -1.142123 | 1.427009  |
| 1 | 3.188081  | -0.476782 | 1.328149  |
| 1 | 1.902700  | 0.455444  | 2.129072  |
| 6 | 3.620043  | 1.507783  | -1.562336 |
| 1 | 4.078316  | 2.465575  | -1.819446 |
| 1 | 3.116100  | 1.102454  | -2.440868 |
| 8 | 1.915834  | -0.570828 | -1.079301 |

## S51

|    |           |           |           |
|----|-----------|-----------|-----------|
| 1  | 2.779895  | -1.045481 | -0.957856 |
| 53 | -1.554656 | -1.160131 | 0.242770  |
| 1  | 1.898052  | 2.482241  | -0.752574 |
| 1  | 4.404083  | 0.813050  | -1.260101 |
| 16 | 3.424688  | 2.574405  | 1.008651  |
| 1  | 4.397199  | 1.653142  | 1.185244  |
| 8  | 5.294040  | -0.584553 | 0.472033  |
| 8  | -2.664549 | -2.985804 | 0.620115  |
| 7  | 5.287491  | -1.656052 | -0.196568 |
| 7  | -3.846787 | -3.188872 | -0.027838 |
| 8  | 4.248476  | -1.959706 | -0.868837 |
| 8  | 6.271380  | -2.407611 | -0.208397 |
| 8  | -4.390109 | -4.238052 | 0.258494  |
| 8  | -4.251249 | -2.341964 | -0.804016 |

37

Ph-NO3 RSC=4.6

|    |           |           |           |
|----|-----------|-----------|-----------|
| 6  | -3.724657 | 4.350333  | -0.156185 |
| 6  | -3.123541 | 4.043560  | 1.064876  |
| 6  | -2.126577 | 3.077634  | 1.130092  |
| 6  | -1.714403 | 2.409015  | -0.036494 |
| 6  | -2.325599 | 2.723635  | -1.263444 |
| 6  | -3.324221 | 3.687919  | -1.317260 |
| 1  | -4.505559 | 5.101122  | -0.202456 |
| 1  | -3.434797 | 4.555569  | 1.968286  |
| 1  | -1.658916 | 2.829436  | 2.074938  |
| 1  | -2.013119 | 2.201016  | -2.158993 |
| 1  | -3.793359 | 3.921812  | -2.266053 |
| 6  | -0.671945 | 1.440575  | 0.023596  |
| 6  | 0.279131  | 0.667957  | 0.049766  |
| 6  | 1.705779  | 0.257821  | 0.144377  |
| 6  | 2.466907  | 1.576312  | -0.385998 |
| 6  | 2.003913  | -0.120616 | 1.607076  |
| 1  | 1.356369  | -0.955097 | 1.883878  |
| 1  | 3.044435  | -0.439130 | 1.684944  |
| 1  | 1.838884  | 0.715797  | 2.287624  |
| 6  | 2.892347  | 1.432271  | -1.849232 |
| 1  | 3.279853  | 2.389088  | -2.206089 |
| 1  | 2.042786  | 1.135639  | -2.470997 |
| 8  | 1.903731  | -0.845235 | -0.699383 |
| 1  | 2.859514  | -1.109858 | -0.687991 |
| 53 | -1.627559 | -1.173197 | 0.225173  |
| 1  | 1.761117  | 2.405257  | -0.317878 |
| 1  | 3.668403  | 0.674384  | -1.962911 |
| 16 | 3.817487  | 2.189551  | 0.689953  |
| 1  | 4.589102  | 1.064767  | 0.667728  |
| 8  | 5.325606  | -0.755688 | 0.824584  |
| 8  | -2.811634 | -2.996069 | 0.507977  |
| 7  | 5.449747  | -1.507216 | -0.185452 |
| 7  | -3.980478 | -3.136988 | -0.166497 |
| 8  | 4.481816  | -1.598632 | -1.006996 |
| 8  | 6.491661  | -2.142519 | -0.381355 |
| 8  | -4.562642 | -4.182376 | 0.057229  |
| 8  | -4.348737 | -2.243515 | -0.910913 |

37

Ph-NO3 RSC=4.8

|   |           |          |           |
|---|-----------|----------|-----------|
| 6 | -3.874489 | 4.226749 | -0.283529 |
| 6 | -3.313439 | 3.959049 | 0.965349  |
| 6 | -2.276995 | 3.040610 | 1.083921  |
| 6 | -1.784915 | 2.380604 | -0.055759 |
| 6 | -2.356357 | 2.654823 | -1.310727 |
| 6 | -3.394179 | 3.572340 | -1.418417 |
| 1 | -4.686066 | 4.940321 | -0.371781 |
| 1 | -3.686728 | 4.464124 | 1.848994  |
| 1 | -1.840674 | 2.822657 | 2.051019  |
| 1 | -1.982522 | 2.138444 | -2.186156 |
| 1 | -3.831737 | 3.775195 | -2.389209 |
| 6 | -0.702557 | 1.459615 | 0.059160  |
| 6 | 0.289242  | 0.746613 | 0.136372  |
| 6 | 1.715908  | 0.345595 | 0.267855  |

S52

|    |           |           |           |
|----|-----------|-----------|-----------|
| 6  | 2.478275  | 1.691021  | -0.144704 |
| 6  | 1.974151  | -0.107610 | 1.715939  |
| 1  | 1.304658  | -0.938261 | 1.947222  |
| 1  | 3.005031  | -0.453069 | 1.799351  |
| 1  | 1.816187  | 0.703029  | 2.430175  |
| 6  | 2.705134  | 1.761767  | -1.656923 |
| 1  | 3.083939  | 2.751359  | -1.921517 |
| 1  | 1.772089  | 1.581391  | -2.199829 |
| 8  | 1.940320  | -0.703670 | -0.636116 |
| 1  | 2.906801  | -0.923067 | -0.699984 |
| 53 | -1.602624 | -1.176774 | 0.247770  |
| 1  | 1.836509  | 2.522775  | 0.153343  |
| 1  | 3.430228  | 1.013266  | -1.977925 |
| 16 | 3.999091  | 2.062692  | 0.814679  |
| 1  | 4.644537  | 0.868755  | 0.645731  |
| 8  | 5.371491  | -0.906396 | 0.730886  |
| 8  | -2.743068 | -3.020395 | 0.501449  |
| 7  | 5.441145  | -1.495623 | -0.386735 |
| 7  | -3.908243 | -3.177319 | -0.181247 |
| 8  | 4.475095  | -1.368073 | -1.205974 |
| 8  | 6.425875  | -2.178093 | -0.687153 |
| 8  | -4.468981 | -4.235792 | 0.031905  |
| 8  | -4.289187 | -2.284760 | -0.918928 |

37

Ph-NO3 RSC=5.0

|    |           |           |           |
|----|-----------|-----------|-----------|
| 6  | -4.047063 | 4.066984  | -0.437122 |
| 6  | -3.467079 | 3.917022  | 0.822462  |
| 6  | -2.384954 | 3.061707  | 0.997241  |
| 6  | -1.865887 | 2.347408  | -0.095853 |
| 6  | -2.456620 | 2.501966  | -1.361455 |
| 6  | -3.539579 | 3.357202  | -1.525826 |
| 1  | -4.893849 | 4.731161  | -0.569302 |
| 1  | -3.860701 | 4.464513  | 1.671440  |
| 1  | -1.933821 | 2.935961  | 1.973944  |
| 1  | -2.063030 | 1.942632  | -2.201110 |
| 1  | -3.991151 | 3.467310  | -2.505153 |
| 6  | -0.736209 | 1.489578  | 0.076828  |
| 6  | 0.313822  | 0.876796  | 0.206466  |
| 6  | 1.733426  | 0.454461  | 0.365107  |
| 6  | 2.549689  | 1.788534  | 0.056032  |
| 6  | 1.947334  | -0.074005 | 1.795066  |
| 1  | 1.250359  | -0.893118 | 1.979846  |
| 1  | 2.965556  | -0.452836 | 1.882216  |
| 1  | 1.800260  | 0.709683  | 2.542029  |
| 6  | 2.687230  | 2.022264  | -1.450733 |
| 1  | 3.114912  | 3.010858  | -1.630132 |
| 1  | 1.712792  | 1.963673  | -1.946272 |
| 8  | 1.949173  | -0.553891 | -0.588810 |
| 1  | 2.913445  | -0.763149 | -0.706633 |
| 53 | -1.583965 | -1.162627 | 0.291342  |
| 1  | 1.981074  | 2.612218  | 0.495606  |
| 1  | 3.340681  | 1.274413  | -1.900856 |
| 16 | 4.168014  | 1.954922  | 0.932429  |
| 1  | 4.699414  | 0.726596  | 0.642435  |
| 8  | 5.399931  | -1.038158 | 0.596323  |
| 8  | -2.684393 | -3.011982 | 0.546309  |
| 7  | 5.398612  | -1.503013 | -0.580499 |
| 7  | -3.824028 | -3.210748 | -0.177094 |
| 8  | 4.423242  | -1.216726 | -1.347039 |
| 8  | 6.322752  | -2.214374 | -0.986782 |
| 8  | -4.367580 | -4.274633 | 0.047119  |
| 8  | -4.193219 | -2.346809 | -0.951392 |

37

Ph-NO3 RSC=5.2

|   |           |          |           |
|---|-----------|----------|-----------|
| 6 | 0.090620  | 5.088348 | -0.019608 |
| 6 | -1.095827 | 4.437088 | -0.358831 |
| 6 | -1.116495 | 3.056351 | -0.518082 |
| 6 | 0.061042  | 2.314624 | -0.331805 |
| 6 | 1.259864  | 2.969514 | 0.014198  |

S53

|    |           |           |           |
|----|-----------|-----------|-----------|
| 6  | 1.261467  | 4.352800  | 0.162334  |
| 1  | 0.100775  | 6.165845  | 0.104619  |
| 1  | -2.009692 | 5.003850  | -0.497103 |
| 1  | -2.038490 | 2.548678  | -0.771802 |
| 1  | 2.173251  | 2.395892  | 0.143820  |
| 1  | 2.187315  | 4.851986  | 0.424712  |
| 6  | 0.119651  | 0.895617  | -0.511285 |
| 6  | 0.426307  | -0.281177 | -0.692889 |
| 6  | 1.286175  | -1.471559 | -0.977039 |
| 6  | 1.527406  | -2.255424 | 0.368126  |
| 6  | 0.645012  | -2.377507 | -2.034199 |
| 1  | 0.509122  | -1.814482 | -2.958847 |
| 1  | 1.325278  | -3.208422 | -2.223864 |
| 1  | -0.320392 | -2.763449 | -1.702423 |
| 6  | 1.723791  | -1.388532 | 1.615902  |
| 1  | 1.934631  | -2.031289 | 2.471916  |
| 1  | 0.824796  | -0.807659 | 1.838457  |
| 8  | 2.458537  | -0.957464 | -1.557141 |
| 1  | 2.953865  | -0.349150 | -0.942625 |
| 53 | -2.060849 | -0.542147 | 0.037296  |
| 1  | 0.656886  | -2.899386 | 0.519880  |
| 1  | 2.559074  | -0.699211 | 1.490795  |
| 16 | 2.919872  | -3.433770 | 0.163377  |
| 1  | 3.897367  | -2.494742 | 0.156491  |
| 8  | 5.166885  | -0.661968 | 0.550391  |
| 8  | -4.038838 | -1.386524 | 0.638968  |
| 7  | 4.831614  | 0.542770  | 0.507105  |
| 7  | -5.149006 | -0.651574 | 0.439574  |
| 8  | 3.715221  | 0.853248  | -0.051980 |
| 8  | 5.533843  | 1.438010  | 0.992091  |
| 8  | -6.191057 | -1.196818 | 0.760958  |
| 8  | -5.039476 | 0.473568  | -0.029842 |

37

Ph-NO3 RSC=5.4

|    |           |           |           |
|----|-----------|-----------|-----------|
| 6  | 0.191323  | 5.157496  | -0.267593 |
| 6  | -0.938762 | 4.484178  | -0.735769 |
| 6  | -0.932340 | 3.099191  | -0.842488 |
| 6  | 0.213378  | 2.375606  | -0.469720 |
| 6  | 1.354276  | 3.052592  | 0.003033  |
| 6  | 1.331229  | 4.440896  | 0.094752  |
| 1  | 0.180533  | 6.239112  | -0.185181 |
| 1  | -1.827812 | 5.038349  | -1.015013 |
| 1  | -1.810638 | 2.572505  | -1.194507 |
| 1  | 2.243158  | 2.482375  | 0.258582  |
| 1  | 2.213041  | 4.958576  | 0.454733  |
| 6  | 0.284975  | 0.953229  | -0.590213 |
| 6  | 0.554914  | -0.245862 | -0.683186 |
| 6  | 1.290230  | -1.510013 | -1.061433 |
| 6  | 1.321914  | -2.509372 | 0.151107  |
| 6  | 0.595739  | -2.121743 | -2.288299 |
| 1  | 0.567943  | -1.382892 | -3.090324 |
| 1  | 1.173093  | -2.984941 | -2.617437 |
| 1  | -0.422390 | -2.439505 | -2.055140 |
| 6  | 1.865096  | -1.898176 | 1.443047  |
| 1  | 1.812433  | -2.632452 | 2.248833  |
| 1  | 1.274206  | -1.025081 | 1.735887  |
| 8  | 2.581544  | -1.134808 | -1.472412 |
| 1  | 3.017704  | -0.505728 | -0.831090 |
| 53 | -1.915555 | -0.436418 | 0.162026  |
| 1  | 0.300693  | -2.864354 | 0.312845  |
| 1  | 2.905127  | -1.584130 | 1.332505  |
| 16 | 2.241993  | -4.069499 | -0.270384 |
| 1  | 3.429573  | -3.465657 | -0.482744 |
| 8  | 5.049419  | -0.446028 | 1.067560  |
| 8  | -3.872339 | -1.174734 | 0.919191  |
| 7  | 4.559974  | 0.683042  | 0.870970  |
| 7  | -5.003676 | -0.544058 | 0.541777  |
| 8  | 3.578353  | 0.801597  | 0.047192  |
| 8  | 4.980576  | 1.698329  | 1.447814  |
| 8  | -6.030963 | -1.037854 | 0.973541  |

S54

8 -4.922846 0.442869 -0.175617

55

Bu-EtSO4 1ec

|    |           |           |           |
|----|-----------|-----------|-----------|
| 6  | -0.725584 | -0.244638 | -0.692840 |
| 6  | -0.130155 | 0.712764  | -0.174274 |
| 6  | -0.158724 | 2.117472  | 0.405576  |
| 6  | -1.065950 | 2.962366  | -0.540532 |
| 6  | -0.708790 | 1.993139  | 1.833801  |
| 1  | -0.083635 | 1.309690  | 2.415761  |
| 1  | -0.692283 | 2.977021  | 2.302967  |
| 1  | -1.729667 | 1.606833  | 1.811178  |
| 6  | -0.430885 | 3.190485  | -1.913870 |
| 1  | -1.154388 | 3.664078  | -2.579084 |
| 1  | -0.122647 | 2.240736  | -2.358773 |
| 8  | 1.125806  | 2.721077  | 0.392116  |
| 1  | 1.725267  | 2.198567  | 0.938436  |
| 53 | 1.806609  | -0.647390 | 0.148343  |
| 1  | -2.009103 | 2.426036  | -0.632784 |
| 1  | 0.452453  | 3.827539  | -1.842177 |
| 16 | -1.505937 | 4.616739  | 0.184185  |
| 1  | -2.695263 | 4.240026  | 0.694943  |
| 8  | -3.452987 | 1.000369  | 0.102785  |
| 8  | 3.803100  | -1.629216 | 0.762228  |
| 8  | -4.489735 | -0.572612 | -1.500974 |
| 8  | -5.811536 | 1.350430  | -0.639833 |
| 8  | 6.202083  | -2.163080 | 0.736903  |
| 8  | 5.064977  | -1.521515 | -1.394959 |
| 16 | 5.146649  | -1.415611 | 0.060998  |
| 16 | -4.709472 | 0.407558  | -0.406674 |
| 8  | 5.368418  | 0.191866  | 0.413345  |
| 8  | -5.178605 | -0.522749 | 0.917210  |
| 6  | 6.540733  | 0.805705  | -0.162840 |
| 1  | 6.488317  | 0.720092  | -1.252278 |
| 1  | 7.430748  | 0.274883  | 0.190556  |
| 6  | 6.550871  | 2.256057  | 0.280807  |
| 1  | 6.592938  | 2.327364  | 1.370053  |
| 1  | 7.426165  | 2.764749  | -0.134366 |
| 1  | 5.653691  | 2.773054  | -0.066814 |
| 6  | -6.456532 | -1.163133 | 0.802419  |
| 1  | -7.228608 | -0.403680 | 0.641299  |
| 1  | -6.450508 | -1.836718 | -0.062516 |
| 6  | -6.700751 | -1.929931 | 2.090677  |
| 1  | -6.697631 | -1.252371 | 2.948091  |
| 1  | -7.671678 | -2.434153 | 2.049767  |
| 1  | -5.925689 | -2.684514 | 2.246880  |
| 6  | -1.452153 | -1.330679 | -1.301309 |
| 6  | -1.751258 | -2.518085 | -0.363846 |
| 1  | -0.932237 | -1.656768 | -2.209998 |
| 1  | -2.418667 | -0.892202 | -1.614794 |
| 6  | -2.587128 | -3.588963 | -1.071385 |
| 1  | -0.811070 | -2.947864 | -0.001245 |
| 1  | -2.296304 | -2.139630 | 0.505457  |
| 6  | -2.919992 | -4.772322 | -0.158428 |
| 1  | -3.509315 | -3.125875 | -1.435440 |
| 1  | -2.043461 | -3.951049 | -1.953545 |
| 1  | -3.517358 | -5.522934 | -0.684542 |
| 1  | -2.011967 | -5.264328 | 0.205944  |
| 1  | -3.492591 | -4.443884 | 0.714383  |

55

Bu-EtSO4 1r

|   |          |           |           |
|---|----------|-----------|-----------|
| 6 | 1.498681 | -1.371958 | -1.275955 |
| 6 | 0.543467 | -1.716813 | -0.407521 |
| 6 | 0.992233 | -2.439783 | 0.864211  |
| 6 | 2.374297 | -3.058890 | 0.515302  |
| 6 | 1.017335 | -1.472807 | 2.055234  |
| 1 | 0.017367 | -1.060885 | 2.207875  |
| 1 | 1.308102 | -2.004295 | 2.963843  |
| 1 | 1.703616 | -0.640006 | 1.888454  |

S55

|    |           |           |           |
|----|-----------|-----------|-----------|
| 6  | 3.310675  | -3.371314 | 1.674564  |
| 1  | 4.214564  | -3.871511 | 1.316370  |
| 1  | 2.807320  | -4.048183 | 2.370203  |
| 8  | 0.168035  | -3.568421 | 1.176991  |
| 1  | -0.756067 | -3.280769 | 1.154353  |
| 53 | -1.508020 | -1.210842 | -0.613018 |
| 1  | 2.150494  | -3.975553 | -0.033435 |
| 1  | 3.611422  | -2.474509 | 2.219067  |
| 16 | 3.138452  | -1.930549 | -0.743971 |
| 1  | 4.054335  | -0.398672 | 0.491147  |
| 8  | 4.559268  | 0.149587  | 1.163102  |
| 8  | -4.132148 | -0.520020 | -0.885973 |
| 8  | 4.431232  | 2.116941  | -0.393530 |
| 8  | 5.096802  | 2.375215  | 2.013681  |
| 8  | -6.474009 | 0.098506  | -0.325507 |
| 8  | -4.936741 | -0.694173 | 1.463714  |
| 16 | -5.088115 | -0.047004 | 0.147547  |
| 16 | 4.310745  | 1.711080  | 0.997405  |
| 8  | -4.527445 | 1.538798  | 0.373497  |
| 8  | 2.738721  | 1.721866  | 1.407708  |
| 6  | -5.276005 | 2.319433  | 1.307424  |
| 1  | -5.284137 | 1.817565  | 2.282271  |
| 1  | -6.311872 | 2.410863  | 0.960613  |
| 6  | -4.611840 | 3.683227  | 1.403545  |
| 1  | -4.599173 | 4.174941  | 0.427281  |
| 1  | -5.156724 | 4.321441  | 2.107340  |
| 1  | -3.580214 | 3.585369  | 1.751905  |
| 6  | 2.005389  | 2.973256  | 1.204840  |
| 1  | 2.489699  | 3.752770  | 1.799348  |
| 1  | 2.064612  | 3.233769  | 0.146294  |
| 6  | 0.580658  | 2.727046  | 1.651268  |
| 1  | 0.544053  | 2.450407  | 2.706654  |
| 1  | -0.002346 | 3.641797  | 1.514042  |
| 1  | 0.112091  | 1.935376  | 1.064505  |
| 6  | 1.393164  | -0.626454 | -2.574601 |
| 6  | 1.658117  | 0.886770  | -2.461142 |
| 1  | 0.385834  | -0.784472 | -2.971100 |
| 1  | 2.093565  | -1.064302 | -3.295621 |
| 6  | 1.554459  | 1.603181  | -3.812044 |
| 1  | 0.929508  | 1.315685  | -1.764150 |
| 1  | 2.648837  | 1.065398  | -2.030845 |
| 6  | 1.782723  | 3.114125  | -3.706148 |
| 1  | 2.286810  | 1.171484  | -4.506080 |
| 1  | 0.567082  | 1.411781  | -4.248977 |
| 1  | 1.719432  | 3.597157  | -4.685927 |
| 1  | 1.031683  | 3.579484  | -3.059852 |
| 1  | 2.767993  | 3.335556  | -3.284621 |

55

Bu-EtSO4 RCS=1.8

|    |           |           |           |
|----|-----------|-----------|-----------|
| 6  | 1.544455  | -0.930587 | -1.590287 |
| 6  | 0.993449  | -1.723206 | -0.665352 |
| 6  | 1.945313  | -2.500113 | 0.243443  |
| 6  | 3.299042  | -2.533308 | -0.520528 |
| 6  | 2.023437  | -1.864243 | 1.636673  |
| 1  | 1.030177  | -1.859655 | 2.090157  |
| 1  | 2.688650  | -2.447073 | 2.277315  |
| 1  | 2.372981  | -0.831419 | 1.595582  |
| 6  | 4.563896  | -2.722192 | 0.305896  |
| 1  | 5.439592  | -2.802382 | -0.343996 |
| 1  | 4.486379  | -3.650921 | 0.877820  |
| 8  | 1.569766  | -3.880401 | 0.366676  |
| 1  | 0.628550  | -3.909178 | 0.588934  |
| 53 | -1.082725 | -1.770424 | -0.246928 |
| 1  | 3.205367  | -3.347866 | -1.241083 |
| 1  | 4.730898  | -1.898571 | 1.002146  |
| 16 | 3.343048  | -0.992491 | -1.555197 |
| 1  | 3.916695  | 0.526872  | -0.043187 |
| 8  | 4.312356  | 1.042128  | 0.715096  |
| 8  | -3.727263 | -1.516164 | 0.592632  |
| 8  | 3.255315  | 3.125846  | -0.205941 |

S56

|    |           |           |           |
|----|-----------|-----------|-----------|
| 8  | 4.242177  | 3.051577  | 2.101442  |
| 8  | -5.409911 | -0.384181 | 2.037183  |
| 8  | -3.257757 | 0.748009  | 1.514023  |
| 16 | -4.280029 | -0.238693 | 1.105381  |
| 16 | 3.530931  | 2.399504  | 1.023282  |
| 8  | -4.952590 | 0.394927  | -0.313159 |
| 8  | 2.158726  | 1.739686  | 1.570499  |
| 6  | -5.638919 | 1.639624  | -0.162485 |
| 1  | -4.943674 | 2.398503  | 0.216192  |
| 1  | -6.450081 | 1.524218  | 0.565445  |
| 6  | -6.182115 | 2.031541  | -1.526754 |
| 1  | -6.870895 | 1.269030  | -1.899481 |
| 1  | -6.719315 | 2.983725  | -1.461061 |
| 1  | -5.369122 | 2.141218  | -2.249155 |
| 6  | 1.041382  | 2.654843  | 1.863944  |
| 1  | 1.403128  | 3.404620  | 2.572617  |
| 1  | 0.757954  | 3.142560  | 0.929453  |
| 6  | -0.083392 | 1.825510  | 2.439962  |
| 1  | 0.233042  | 1.323051  | 3.356423  |
| 1  | -0.927007 | 2.478045  | 2.678311  |
| 1  | -0.453346 | 1.082557  | 1.733200  |
| 6  | 0.881902  | -0.031097 | -2.594871 |
| 6  | 0.689356  | 1.422794  | -2.123677 |
| 1  | -0.096116 | -0.459616 | -2.833806 |
| 1  | 1.469123  | -0.039034 | -3.520721 |
| 6  | 0.015260  | 2.295872  | -3.187814 |
| 1  | 0.075911  | 1.416601  | -1.216737 |
| 1  | 1.653611  | 1.862612  | -1.849982 |
| 6  | -0.219176 | 3.734521  | -2.717019 |
| 1  | 0.634096  | 2.303700  | -4.094554 |
| 1  | -0.942658 | 1.844232  | -3.472130 |
| 1  | -0.684566 | 4.339820  | -3.501004 |
| 1  | -0.880213 | 3.757135  | -1.845319 |
| 1  | 0.722198  | 4.215383  | -2.434007 |

55

Bu-EtSO4 RCS=2.0

|    |           |           |           |
|----|-----------|-----------|-----------|
| 6  | 1.414726  | -0.858126 | -1.619915 |
| 6  | 0.900593  | -1.682277 | -0.718500 |
| 6  | 1.840781  | -2.530134 | 0.140764  |
| 6  | 3.184869  | -2.613717 | -0.638794 |
| 6  | 1.964508  | -1.945214 | 1.552764  |
| 1  | 0.977325  | -1.903943 | 2.017781  |
| 1  | 2.603296  | -2.584126 | 2.165804  |
| 1  | 2.367682  | -0.932026 | 1.541930  |
| 6  | 4.416929  | -2.989850 | 0.176647  |
| 1  | 5.283009  | -3.123969 | -0.476859 |
| 1  | 4.234779  | -3.937142 | 0.691370  |
| 8  | 1.400629  | -3.893504 | 0.222733  |
| 1  | 0.470912  | -3.888526 | 0.490474  |
| 53 | -1.181517 | -1.701967 | -0.270394 |
| 1  | 3.019888  | -3.363895 | -1.414043 |
| 1  | 4.667206  | -2.231588 | 0.920873  |
| 16 | 3.407076  | -1.019302 | -1.552367 |
| 1  | 3.982055  | 0.371633  | 0.029325  |
| 8  | 4.381845  | 0.861153  | 0.807594  |
| 8  | -3.786972 | -1.488008 | 0.570558  |
| 8  | 3.412079  | 2.995263  | -0.091990 |
| 8  | 4.371115  | 2.851532  | 2.223425  |
| 8  | -5.551122 | -0.400371 | 1.947869  |
| 8  | -3.357826 | 0.728164  | 1.620058  |
| 16 | -4.360370 | -0.225014 | 1.101891  |
| 16 | 3.650834  | 2.239455  | 1.127599  |
| 8  | -4.928984 | 0.475335  | -0.329703 |
| 8  | 2.247250  | 1.624455  | 1.652682  |
| 6  | -5.613721 | 1.720551  | -0.172438 |
| 1  | -4.941319 | 2.452867  | 0.290263  |
| 1  | -6.476940 | 1.581955  | 0.488403  |
| 6  | -6.051846 | 2.179906  | -1.553238 |
| 1  | -6.717667 | 1.443152  | -2.009963 |
| 1  | -6.584500 | 3.134279  | -1.483185 |



S57

|   |           |           |           |
|---|-----------|-----------|-----------|
| 1 | -5.187069 | 2.312783  | -2.208461 |
| 6 | 1.166091  | 2.575817  | 1.954675  |
| 1 | 1.544326  | 3.288510  | 2.692482  |
| 1 | 0.919314  | 3.104061  | 1.031644  |
| 6 | -0.002694 | 1.776740  | 2.485459  |
| 1 | 0.273589  | 1.239041  | 3.394757  |
| 1 | -0.826602 | 2.454166  | 2.723420  |
| 1 | -0.380185 | 1.063970  | 1.751875  |
| 6 | 0.834512  | 0.107675  | -2.595496 |
| 6 | 0.795600  | 1.568092  | -2.108350 |
| 1 | -0.185524 | -0.224745 | -2.816300 |
| 1 | 1.399268  | 0.047856  | -3.532801 |
| 6 | 0.214008  | 2.517724  | -3.161369 |
| 1 | 0.187873  | 1.615052  | -1.198585 |
| 1 | 1.800771  | 1.900487  | -1.831725 |
| 6 | 0.129110  | 3.967366  | -2.673992 |
| 1 | 0.830857  | 2.472355  | -4.068218 |
| 1 | -0.785050 | 2.170401  | -3.451051 |
| 1 | -0.269068 | 4.626633  | -3.451392 |
| 1 | -0.527742 | 4.049070  | -1.802528 |
| 1 | 1.114348  | 4.344259  | -2.383469 |

55

Bu-EtSO4 RCS=2.2

|    |           |           |           |
|----|-----------|-----------|-----------|
| 6  | 1.182229  | -0.726803 | -1.629083 |
| 6  | 0.665068  | -1.583519 | -0.778562 |
| 6  | 1.545230  | -2.585648 | -0.023333 |
| 6  | 2.841263  | -2.786910 | -0.863119 |
| 6  | 1.788872  | -2.098459 | 1.410357  |
| 1  | 0.831222  | -1.968479 | 1.919253  |
| 1  | 2.367787  | -2.841849 | 1.961577  |
| 1  | 2.311148  | -1.141639 | 1.432378  |
| 6  | 3.999749  | -3.451105 | -0.122889 |
| 1  | 4.815723  | -3.675595 | -0.814487 |
| 1  | 3.658432  | -4.393103 | 0.314729  |
| 8  | 0.951998  | -3.889993 | 0.005107  |
| 1  | 0.043495  | -3.799454 | 0.325608  |
| 53 | -1.420739 | -1.485196 | -0.278290 |
| 1  | 2.540632  | -3.420573 | -1.699162 |
| 1  | 4.396242  | -2.818690 | 0.673804  |
| 16 | 3.335294  | -1.178782 | -1.623815 |
| 1  | 4.139539  | -0.048334 | -0.009616 |
| 8  | 4.643335  | 0.354219  | 0.767564  |
| 8  | -3.981701 | -1.351163 | 0.492718  |
| 8  | 3.927233  | 2.634460  | -0.000829 |
| 8  | 4.975363  | 2.267885  | 2.250070  |
| 8  | -5.970588 | -0.437484 | 1.668867  |
| 8  | -3.770242 | 0.707557  | 1.878273  |
| 16 | -4.654321 | -0.158021 | 1.076172  |
| 16 | 4.129687  | 1.799264  | 1.172955  |
| 8  | -4.972787 | 0.722278  | -0.332405 |
| 8  | 2.678681  | 1.359035  | 1.756496  |
| 6  | -5.682790 | 1.948917  | -0.139598 |
| 1  | -5.110459 | 2.601932  | 0.529820  |
| 1  | -6.651122 | 1.740156  | 0.329241  |
| 6  | -5.864765 | 2.592050  | -1.504284 |
| 1  | -6.430216 | 1.932788  | -2.167841 |
| 1  | -6.408646 | 3.537605  | -1.407077 |
| 1  | -4.895827 | 2.795532  | -1.967446 |
| 6  | 1.759013  | 2.432981  | 2.142025  |
| 1  | 2.249133  | 3.041274  | 2.907127  |
| 1  | 1.566531  | 3.046640  | 1.259461  |
| 6  | 0.500053  | 1.775660  | 2.664022  |
| 1  | 0.716403  | 1.155208  | 3.535827  |
| 1  | -0.215785 | 2.546871  | 2.960287  |
| 1  | 0.023766  | 1.156858  | 1.902249  |
| 6  | 0.751935  | 0.374062  | -2.519035 |
| 6  | 1.031556  | 1.787289  | -1.977481 |
| 1  | -0.326406 | 0.249255  | -2.676500 |
| 1  | 1.231794  | 0.249485  | -3.496104 |
| 6  | 0.596690  | 2.882809  | -2.956954 |

S58

|   |           |          |           |
|---|-----------|----------|-----------|
| 1 | 0.497076  | 1.909424 | -1.029274 |
| 1 | 2.096316  | 1.897555 | -1.751870 |
| 6 | 0.832386  | 4.295116 | -2.413040 |
| 1 | 1.142944  | 2.759121 | -3.900760 |
| 1 | -0.465642 | 2.755691 | -3.197997 |
| 1 | 0.535059  | 5.056839 | -3.140140 |
| 1 | 0.253021  | 4.465323 | -1.500172 |
| 1 | 1.887153  | 4.453163 | -2.169563 |

55

Bu-EtSO4 RCS=2.4

|    |           |           |           |
|----|-----------|-----------|-----------|
| 6  | 1.009075  | -0.618539 | -1.622526 |
| 6  | 0.521197  | -1.503839 | -0.803609 |
| 6  | 1.369067  | -2.574814 | -0.101949 |
| 6  | 2.629065  | -2.848156 | -0.978091 |
| 6  | 1.678192  | -2.123114 | 1.330981  |
| 1  | 0.744032  | -1.942195 | 1.867731  |
| 1  | 2.224136  | -2.908806 | 1.856245  |
| 1  | 2.260465  | -1.201778 | 1.349182  |
| 6  | 3.704047  | -3.685023 | -0.283159 |
| 1  | 4.480291  | -3.971418 | -0.996768 |
| 1  | 3.254795  | -4.597836 | 0.117073  |
| 8  | 0.695906  | -3.837803 | -0.077766 |
| 1  | -0.186826 | -3.704565 | 0.295175  |
| 53 | -1.573728 | -1.354597 | -0.269462 |
| 1  | 2.254518  | -3.401587 | -1.840983 |
| 1  | 4.182727  | -3.141312 | 0.533767  |
| 16 | 3.315779  | -1.280144 | -1.659880 |
| 1  | 4.226352  | -0.318208 | -0.063213 |
| 8  | 4.787682  | 0.038519  | 0.708675  |
| 8  | -4.088510 | -1.271551 | 0.478939  |
| 8  | 4.229920  | 2.370304  | -0.032103 |
| 8  | 5.357072  | 1.918686  | 2.163918  |
| 8  | -6.154872 | -0.435006 | 1.568879  |
| 8  | -3.988779 | 0.729575  | 1.959928  |
| 16 | -4.811605 | -0.108167 | 1.070972  |
| 16 | 4.425202  | 1.517340  | 1.130770  |
| 8  | -5.055863 | 0.822844  | -0.316680 |
| 8  | 2.969985  | 1.208033  | 1.793703  |
| 6  | -5.784700 | 2.038555  | -0.117542 |
| 1  | -5.255043 | 2.667506  | 0.607392  |
| 1  | -6.776191 | 1.806524  | 0.287393  |
| 6  | -5.894117 | 2.731955  | -1.464977 |
| 1  | -6.416761 | 2.095843  | -2.183827 |
| 1  | -6.449265 | 3.670290  | -1.362645 |
| 1  | -4.902152 | 2.957991  | -1.864445 |
| 6  | 2.188761  | 2.359338  | 2.241653  |
| 1  | 2.772465  | 2.897420  | 2.993710  |
| 1  | 2.017903  | 3.011530  | 1.382198  |
| 6  | 0.893652  | 1.822232  | 2.812155  |
| 1  | 1.085519  | 1.161129  | 3.659485  |
| 1  | 0.276066  | 2.655301  | 3.158410  |
| 1  | 0.325530  | 1.271769  | 2.060673  |
| 6  | 0.703696  | 0.546218  | -2.465708 |
| 6  | 1.153056  | 1.898719  | -1.885514 |
| 1  | -0.386248 | 0.546175  | -2.604275 |
| 1  | 1.146698  | 0.396064  | -3.456042 |
| 6  | 0.841157  | 3.067227  | -2.826575 |
| 1  | 0.647167  | 2.053146  | -0.926329 |
| 1  | 2.225467  | 1.871470  | -1.672934 |
| 6  | 1.250232  | 4.423427  | -2.244107 |
| 1  | 1.359646  | 2.908565  | -3.780579 |
| 1  | -0.231128 | 3.075697  | -3.057411 |
| 1  | 1.039646  | 5.237392  | -2.944307 |
| 1  | 0.704571  | 4.633578  | -1.318764 |
| 1  | 2.318581  | 4.445575  | -2.010385 |

55

Bu-EtSO4 RCS=2.6

|   |          |           |           |
|---|----------|-----------|-----------|
| 6 | 0.873416 | -0.545267 | -1.625500 |
| 6 | 0.430364 | -1.451769 | -0.824475 |

S59

|    |           |           |           |
|----|-----------|-----------|-----------|
| 6  | 1.257723  | -2.547165 | -0.129958 |
| 6  | 2.505198  | -2.873762 | -1.009141 |
| 6  | 1.587041  | -2.089676 | 1.296609  |
| 1  | 0.662068  | -1.879394 | 1.839028  |
| 1  | 2.115804  | -2.885305 | 1.824223  |
| 1  | 2.195181  | -1.185379 | 1.301133  |
| 6  | 3.496884  | -3.815937 | -0.319700 |
| 1  | 4.252602  | -4.150177 | -1.034045 |
| 1  | 2.969568  | -4.694943 | 0.060298  |
| 8  | 0.540871  | -3.783712 | -0.093142 |
| 1  | -0.321838 | -3.626442 | 0.314963  |
| 53 | -1.688913 | -1.279269 | -0.292087 |
| 1  | 2.099331  | -3.378585 | -1.887835 |
| 1  | 4.013991  | -3.328027 | 0.509094  |
| 16 | 3.341036  | -1.363995 | -1.648706 |
| 1  | 4.267707  | -0.495305 | -0.080675 |
| 8  | 4.851656  | -0.147156 | 0.694310  |
| 8  | -4.162601 | -1.238413 | 0.411370  |
| 8  | 4.365882  | 2.192592  | -0.067843 |
| 8  | 5.548556  | 1.733106  | 2.096131  |
| 8  | -6.275677 | -0.446604 | 1.435014  |
| 8  | -4.121702 | 0.650671  | 2.037516  |
| 16 | -4.903116 | -0.102093 | 1.044116  |
| 16 | 4.569986  | 1.346791  | 1.099671  |
| 8  | -5.047787 | 0.924566  | -0.284594 |
| 8  | 3.124001  | 1.116503  | 1.822207  |
| 6  | -5.760030 | 2.143958  | -0.042852 |
| 1  | -5.258938 | 2.707066  | 0.752691  |
| 1  | -6.778183 | 1.910396  | 0.287897  |
| 6  | -5.774708 | 2.929172  | -1.343093 |
| 1  | -6.268614 | 2.357405  | -2.132722 |
| 1  | -6.313778 | 3.872503  | -1.207450 |
| 1  | -4.756311 | 3.155885  | -1.668630 |
| 6  | 2.439493  | 2.307718  | 2.312068  |
| 1  | 3.088606  | 2.803263  | 3.039459  |
| 1  | 2.268043  | 2.978488  | 1.466682  |
| 6  | 1.141003  | 1.847340  | 2.940392  |
| 1  | 1.331360  | 1.166330  | 3.772233  |
| 1  | 0.594182  | 2.713763  | 3.322342  |
| 1  | 0.506281  | 1.339890  | 2.212115  |
| 6  | 0.682134  | 0.640498  | -2.458242 |
| 6  | 1.220197  | 1.948276  | -1.850945 |
| 1  | -0.403018 | 0.721792  | -2.620731 |
| 1  | 1.131661  | 0.463461  | -3.440869 |
| 6  | 1.025774  | 3.145705  | -2.786939 |
| 1  | 0.704069  | 2.132492  | -0.902529 |
| 1  | 2.280927  | 1.830657  | -1.614133 |
| 6  | 1.529995  | 4.458181  | -2.179439 |
| 1  | 1.553626  | 2.953959  | -3.729530 |
| 1  | -0.036308 | 3.243957  | -3.043722 |
| 1  | 1.404670  | 5.293003  | -2.875465 |
| 1  | 0.980511  | 4.704028  | -1.265136 |
| 1  | 2.590178  | 4.389162  | -1.919831 |

55

Bu-EtSO4 RCS=2.8

|    |           |           |           |
|----|-----------|-----------|-----------|
| 6  | 0.770460  | -0.504427 | -1.644032 |
| 6  | 0.384241  | -1.422155 | -0.846007 |
| 6  | 1.191608  | -2.520391 | -0.128341 |
| 6  | 2.443417  | -2.894943 | -0.986116 |
| 6  | 1.514229  | -2.035532 | 1.290310  |
| 1  | 0.588654  | -1.802408 | 1.822680  |
| 1  | 2.029951  | -2.826653 | 1.837038  |
| 1  | 2.135179  | -1.140519 | 1.279166  |
| 6  | 3.352025  | -3.907046 | -0.276280 |
| 1  | 4.102762  | -4.280949 | -0.975601 |
| 1  | 2.762186  | -4.753377 | 0.085385  |
| 8  | 0.444613  | -3.736961 | -0.074884 |
| 1  | -0.403292 | -3.560652 | 0.355070  |
| 53 | -1.769672 | -1.226380 | -0.333999 |
| 1  | 2.031441  | -3.370132 | -1.878741 |

S60

|    |           |           |           |
|----|-----------|-----------|-----------|
| 1  | 3.880218  | -3.455945 | 0.566381  |
| 16 | 3.405593  | -1.449773 | -1.595048 |
| 1  | 4.281667  | -0.620607 | -0.053021 |
| 8  | 4.861451  | -0.253848 | 0.738230  |
| 8  | -4.199596 | -1.216921 | 0.329140  |
| 8  | 4.416963  | 2.071438  | -0.086843 |
| 8  | 5.615706  | 1.654341  | 2.075502  |
| 8  | -6.326606 | -0.461677 | 1.342278  |
| 8  | -4.175973 | 0.561962  | 2.077613  |
| 16 | -4.941429 | -0.106443 | 1.016299  |
| 16 | 4.621249  | 1.251039  | 1.099829  |
| 8  | -5.029449 | 1.000664  | -0.245789 |
| 8  | 3.176751  | 1.081352  | 1.851224  |
| 6  | -5.722478 | 2.220351  | 0.053096  |
| 1  | -5.231709 | 2.719890  | 0.895739  |
| 1  | -6.754239 | 1.989509  | 0.340119  |
| 6  | -5.682233 | 3.084089  | -1.195349 |
| 1  | -6.165437 | 2.574186  | -2.032432 |
| 1  | -6.204570 | 4.029279  | -1.015494 |
| 1  | -4.650234 | 3.306966  | -1.477493 |
| 6  | 2.556295  | 2.300871  | 2.348476  |
| 1  | 3.242766  | 2.774934  | 3.055728  |
| 1  | 2.389910  | 2.974447  | 1.503823  |
| 6  | 1.255937  | 1.899824  | 3.013629  |
| 1  | 1.439685  | 1.216780  | 3.845379  |
| 1  | 0.755113  | 2.790647  | 3.402798  |
| 1  | 0.583220  | 1.413136  | 2.305409  |
| 6  | 0.685094  | 0.673352  | -2.493586 |
| 6  | 1.272280  | 1.955329  | -1.875156 |
| 1  | -0.385722 | 0.813358  | -2.708361 |
| 1  | 1.165602  | 0.453970  | -3.452778 |
| 6  | 1.201057  | 3.146583  | -2.835847 |
| 1  | 0.722040  | 2.185749  | -0.956546 |
| 1  | 2.309986  | 1.772619  | -1.585107 |
| 6  | 1.760870  | 4.432564  | -2.220416 |
| 1  | 1.761290  | 2.905645  | -3.747849 |
| 1  | 0.161454  | 3.309580  | -3.146997 |
| 1  | 1.726384  | 5.262290  | -2.932745 |
| 1  | 1.184398  | 4.728895  | -1.338201 |
| 1  | 2.799590  | 4.296737  | -1.906739 |

55

Bu-EtSO4 RCS=3.0

|    |           |           |           |
|----|-----------|-----------|-----------|
| 6  | 0.908524  | -1.215014 | -1.491423 |
| 6  | 0.238889  | -1.531212 | -0.468225 |
| 6  | 0.574724  | -2.114497 | 0.918143  |
| 6  | 1.829683  | -3.047547 | 0.817217  |
| 6  | 0.729384  | -0.944860 | 1.897592  |
| 1  | -0.192588 | -0.358187 | 1.926507  |
| 1  | 0.914638  | -1.334754 | 2.899615  |
| 1  | 1.548013  | -0.285374 | 1.612271  |
| 6  | 2.228082  | -3.605213 | 2.191838  |
| 1  | 2.968143  | -4.396981 | 2.060480  |
| 1  | 1.356214  | -4.021864 | 2.702575  |
| 8  | -0.461890 | -2.992372 | 1.349527  |
| 1  | -1.289482 | -2.497795 | 1.421571  |
| 53 | -1.896565 | -0.881223 | -0.823733 |
| 1  | 1.497656  | -3.881124 | 0.194451  |
| 1  | 2.678474  | -2.836175 | 2.822996  |
| 16 | 3.289133  | -2.340414 | -0.054004 |
| 1  | 3.955557  | -0.989462 | 0.994835  |
| 8  | 4.453904  | -0.269892 | 1.650221  |
| 8  | -4.264500 | -0.270450 | -1.065633 |
| 8  | 4.807963  | 1.224890  | -0.325632 |
| 8  | 5.527715  | 1.915772  | 1.971861  |
| 8  | -6.586411 | 0.203623  | -0.366951 |
| 8  | -4.943753 | -0.664515 | 1.300063  |
| 16 | -5.192092 | 0.093247  | 0.067489  |
| 16 | 4.609486  | 1.179730  | 1.119462  |
| 8  | -4.666672 | 1.653164  | 0.371691  |
| 8  | 3.082572  | 1.714671  | 1.425000  |

## S61

|   |           |           |           |
|---|-----------|-----------|-----------|
| 6 | -5.357353 | 2.343748  | 1.425634  |
| 1 | -5.252366 | 1.778217  | 2.357659  |
| 1 | -6.421825 | 2.409850  | 1.176256  |
| 6 | -4.735275 | 3.723238  | 1.546144  |
| 1 | -4.837933 | 4.275857  | 0.609108  |
| 1 | -5.231625 | 4.289888  | 2.340319  |
| 1 | -3.672271 | 3.647475  | 1.787177  |
| 6 | 2.815896  | 3.102876  | 1.101149  |
| 1 | 3.518049  | 3.732657  | 1.655109  |
| 1 | 2.974851  | 3.250500  | 0.029069  |
| 6 | 1.381000  | 3.386535  | 1.498190  |
| 1 | 1.236479  | 3.224465  | 2.568395  |
| 1 | 1.136045  | 4.427730  | 1.269155  |
| 1 | 0.688699  | 2.742245  | 0.952988  |
| 6 | 1.373954  | -0.713158 | -2.770300 |
| 6 | 2.135613  | 0.623803  | -2.687154 |
| 1 | 0.484028  | -0.607051 | -3.409114 |
| 1 | 1.995879  | -1.483708 | -3.238433 |
| 6 | 2.663395  | 1.073932  | -4.052879 |
| 1 | 1.464095  | 1.386041  | -2.277323 |
| 1 | 2.965679  | 0.518951  | -1.984244 |
| 6 | 3.409081  | 2.409881  | -3.980707 |
| 1 | 3.336406  | 0.303156  | -4.448187 |
| 1 | 1.832140  | 1.152836  | -4.765406 |
| 1 | 3.803856  | 2.698427  | -4.959443 |
| 1 | 2.745855  | 3.211954  | -3.640797 |
| 1 | 4.245839  | 2.351812  | -3.279376 |

55

Bu-EtSO4 RCS=3.2

|    |           |           |           |
|----|-----------|-----------|-----------|
| 6  | -0.862134 | -0.757889 | 1.344191  |
| 6  | -0.293397 | -1.488514 | 0.510821  |
| 6  | -0.505352 | -2.473548 | -0.631023 |
| 6  | -1.510453 | -3.595265 | -0.197812 |
| 6  | -0.957339 | -1.660082 | -1.853519 |
| 1  | -0.217625 | -0.885452 | -2.074012 |
| 1  | -1.026676 | -2.320544 | -2.719289 |
| 1  | -1.922315 | -1.176627 | -1.686753 |
| 6  | -1.866558 | -4.521285 | -1.367132 |
| 1  | -2.395986 | -5.396976 | -0.987576 |
| 1  | -0.960963 | -4.852435 | -1.881012 |
| 8  | 0.683367  | -3.204764 | -0.915840 |
| 1  | 1.376006  | -2.596604 | -1.204814 |
| 53 | 1.844474  | -0.627726 | 0.895628  |
| 1  | -0.972378 | -4.174235 | 0.556577  |
| 1  | -2.522462 | -4.023435 | -2.083918 |
| 16 | -3.013989 | -3.039526 | 0.708860  |
| 1  | -3.518705 | -2.161998 | -0.207052 |
| 8  | -4.120642 | -0.636016 | -1.221733 |
| 8  | 4.112632  | -0.061531 | 1.044040  |
| 8  | -4.133758 | 0.906925  | 0.723484  |
| 8  | -5.983659 | 1.000370  | -0.930043 |
| 8  | 6.424744  | 0.228616  | 0.244161  |
| 8  | 4.734378  | -0.880025 | -1.228068 |
| 16 | 5.030589  | 0.083308  | -0.164587 |
| 16 | -4.578320 | 0.661007  | -0.672250 |
| 8  | 4.521255  | 1.566202  | -0.712101 |
| 8  | -3.669560 | 1.726771  | -1.609186 |
| 6  | 5.177354  | 2.055618  | -1.899426 |
| 1  | 5.026834  | 1.338435  | -2.712404 |
| 1  | 6.250669  | 2.144922  | -1.703007 |
| 6  | 4.562098  | 3.402687  | -2.227981 |
| 1  | 4.709768  | 4.105776  | -1.405070 |
| 1  | 5.030069  | 3.815923  | -3.126685 |
| 1  | 3.489717  | 3.303602  | -2.410257 |
| 6  | -3.981106 | 3.116854  | -1.450193 |
| 1  | -5.034661 | 3.282121  | -1.697893 |
| 1  | -3.824379 | 3.410666  | -0.405395 |
| 6  | -3.067571 | 3.898176  | -2.378827 |
| 1  | -3.226543 | 3.596513  | -3.417039 |
| 1  | -3.272196 | 4.970284  | -2.293337 |

S62

|   |           |           |           |
|---|-----------|-----------|-----------|
| 1 | -2.017984 | 3.724998  | -2.128501 |
| 6 | -1.541984 | 0.141274  | 2.240436  |
| 6 | -1.113581 | 1.622068  | 2.135841  |
| 1 | -1.478370 | -0.226216 | 3.270416  |
| 1 | -2.597136 | 0.086057  | 1.914263  |
| 6 | -2.008951 | 2.517453  | 2.997077  |
| 1 | -0.065564 | 1.724706  | 2.435661  |
| 1 | -1.184916 | 1.928861  | 1.088936  |
| 6 | -1.605382 | 3.992875  | 2.924706  |
| 1 | -3.044027 | 2.396011  | 2.664267  |
| 1 | -1.966824 | 2.179240  | 4.040509  |
| 1 | -2.259267 | 4.612093  | 3.545826  |
| 1 | -0.576509 | 4.144586  | 3.267589  |
| 1 | -1.671082 | 4.367658  | 1.898629  |

55

Bu-EtSO4 RCS=3.4

|    |           |           |           |
|----|-----------|-----------|-----------|
| 6  | -0.696804 | -0.684110 | 1.320571  |
| 6  | -0.304067 | -1.506215 | 0.479513  |
| 6  | -0.570247 | -2.492559 | -0.642261 |
| 6  | -1.524213 | -3.637816 | -0.155949 |
| 6  | -1.111499 | -1.685465 | -1.832776 |
| 1  | -0.395741 | -0.903561 | -2.102009 |
| 1  | -1.231435 | -2.348153 | -2.691186 |
| 1  | -2.068164 | -1.211416 | -1.602629 |
| 6  | -1.906484 | -4.579381 | -1.304758 |
| 1  | -2.394647 | -5.465674 | -0.895510 |
| 1  | -1.018218 | -4.890385 | -1.859743 |
| 8  | 0.614639  | -3.200372 | -1.004033 |
| 1  | 1.269582  | -2.577526 | -1.343487 |
| 53 | 1.923226  | -0.690647 | 0.830616  |
| 1  | -0.935381 | -4.197912 | 0.574410  |
| 1  | -2.609628 | -4.103836 | -1.991266 |
| 16 | -3.006038 | -3.128314 | 0.817280  |
| 1  | -3.546748 | -2.228203 | -0.052256 |
| 8  | -4.194823 | -0.658659 | -1.026560 |
| 8  | 4.191299  | -0.244624 | 0.920606  |
| 8  | -3.901431 | 1.016515  | 0.783580  |
| 8  | -6.056692 | 0.899055  | -0.443955 |
| 8  | 6.461279  | 0.137092  | 0.049745  |
| 8  | 4.683236  | -0.741480 | -1.474965 |
| 16 | 5.048718  | 0.063112  | -0.307808 |
| 16 | -4.608978 | 0.648779  | -0.468522 |
| 8  | 4.531016  | 1.608925  | -0.610964 |
| 8  | -3.984261 | 1.690775  | -1.637122 |
| 6  | 5.113094  | 2.252886  | -1.764115 |
| 1  | 4.892887  | 1.656255  | -2.654609 |
| 1  | 6.198759  | 2.304265  | -1.633277 |
| 6  | 4.501764  | 3.637698  | -1.858626 |
| 1  | 4.719701  | 4.218551  | -0.959566 |
| 1  | 4.913839  | 4.167072  | -2.723042 |
| 1  | 3.417714  | 3.574396  | -1.975901 |
| 6  | -4.312143 | 3.075598  | -1.471753 |
| 1  | -5.400801 | 3.193910  | -1.480794 |
| 1  | -3.936592 | 3.428047  | -0.503744 |
| 6  | -3.666561 | 3.837380  | -2.616602 |
| 1  | -4.041736 | 3.476943  | -3.577650 |
| 1  | -3.893198 | 4.905315  | -2.533494 |
| 1  | -2.581025 | 3.711407  | -2.603249 |
| 6  | -1.284565 | 0.257705  | 2.246337  |
| 6  | -0.914134 | 1.734864  | 2.006420  |
| 1  | -1.075347 | -0.048311 | 3.277315  |
| 1  | -2.367617 | 0.151569  | 2.063622  |
| 6  | -1.710768 | 2.664001  | 2.926731  |
| 1  | 0.161205  | 1.875341  | 2.159159  |
| 1  | -1.134808 | 1.978227  | 0.963973  |
| 6  | -1.357109 | 4.139388  | 2.719532  |
| 1  | -2.776967 | 2.507833  | 2.737799  |
| 1  | -1.526003 | 2.388561  | 3.973301  |
| 1  | -1.939896 | 4.783306  | 3.384839  |
| 1  | -0.296420 | 4.328671  | 2.915617  |

S63

1 -1.565213 4.450687 1.691289

55

Bu-EtSO4 RCS=3.6

|    |           |           |           |
|----|-----------|-----------|-----------|
| 6  | -0.566497 | -0.710633 | 1.438953  |
| 6  | -0.368006 | -1.549292 | 0.559373  |
| 6  | -0.613334 | -2.493189 | -0.592098 |
| 6  | -1.599588 | -3.638384 | -0.173164 |
| 6  | -1.096578 | -1.650978 | -1.783145 |
| 1  | -0.357979 | -0.877078 | -2.010141 |
| 1  | -1.197784 | -2.293805 | -2.658771 |
| 1  | -2.052509 | -1.165094 | -1.576498 |
| 6  | -1.940272 | -4.551670 | -1.357330 |
| 1  | -2.453329 | -5.440643 | -0.985657 |
| 1  | -1.033390 | -4.860997 | -1.882202 |
| 8  | 0.576909  | -3.212386 | -0.926374 |
| 1  | 1.245330  | -2.592250 | -1.243856 |
| 53 | 1.956394  | -0.675833 | 0.857980  |
| 1  | -1.045047 | -4.218544 | 0.568116  |
| 1  | -2.611375 | -4.055698 | -2.061123 |
| 16 | -3.125386 | -3.145902 | 0.745014  |
| 1  | -3.608773 | -2.187610 | -0.099279 |
| 8  | -4.219380 | -0.622004 | -1.074819 |
| 8  | 4.200480  | -0.246106 | 0.848830  |
| 8  | -3.795656 | 1.064513  | 0.697987  |
| 8  | -6.033364 | 0.939211  | -0.368351 |
| 8  | 6.424581  | 0.124031  | -0.131297 |
| 8  | 4.574350  | -0.762933 | -1.565005 |
| 16 | 4.998783  | 0.052879  | -0.427203 |
| 16 | -4.590269 | 0.689191  | -0.493591 |
| 8  | 4.467174  | 1.593412  | -0.712720 |
| 8  | -4.054271 | 1.722497  | -1.715308 |
| 6  | 4.978161  | 2.227442  | -1.906340 |
| 1  | 4.706165  | 1.620705  | -2.775131 |
| 1  | 6.069417  | 2.282006  | -1.840159 |
| 6  | 4.357950  | 3.609374  | -1.976918 |
| 1  | 4.627942  | 4.199751  | -1.098496 |
| 1  | 4.715873  | 4.130736  | -2.869749 |
| 1  | 3.269134  | 3.542066  | -2.028480 |
| 6  | -4.364215 | 3.108448  | -1.532937 |
| 1  | -5.450368 | 3.231811  | -1.464455 |
| 1  | -3.918990 | 3.463769  | -0.595946 |
| 6  | -3.799302 | 3.863823  | -2.723967 |
| 1  | -4.242824 | 3.500831  | -3.654518 |
| 1  | -4.015914 | 4.932968  | -2.629593 |
| 1  | -2.715963 | 3.733788  | -2.786923 |
| 6  | -1.058389 | 0.205441  | 2.457501  |
| 6  | -0.766112 | 1.693995  | 2.195398  |
| 1  | -0.686928 | -0.105041 | 3.440628  |
| 1  | -2.146689 | 0.054810  | 2.437760  |
| 6  | -1.448860 | 2.589064  | 3.233503  |
| 1  | 0.315900  | 1.863959  | 2.202550  |
| 1  | -1.139359 | 1.943776  | 1.199945  |
| 6  | -1.164415 | 4.076231  | 3.005053  |
| 1  | -2.527997 | 2.411753  | 3.191950  |
| 1  | -1.116266 | 2.304398  | 4.240531  |
| 1  | -1.664623 | 4.695734  | 3.755415  |
| 1  | -0.091586 | 4.290107  | 3.056014  |
| 1  | -1.520847 | 4.394331  | 2.020820  |

55

Bu-EtSO4 RCS=3.8

|   |           |           |           |
|---|-----------|-----------|-----------|
| 6 | -0.472641 | 0.298908  | 0.086419  |
| 6 | -0.403773 | -0.862708 | -0.335657 |
| 6 | -0.942564 | -2.096491 | -1.007368 |
| 6 | -1.059123 | -3.292765 | -0.013630 |
| 6 | -2.270552 | -1.705817 | -1.675986 |
| 1 | -2.104474 | -0.871012 | -2.362641 |
| 1 | -2.641596 | -2.556352 | -2.249784 |
| 1 | -3.027427 | -1.399704 | -0.951575 |
| 6 | -1.683646 | -4.529766 | -0.668212 |

S64

|    |           |           |           |
|----|-----------|-----------|-----------|
| 1  | -1.568714 | -5.385667 | -0.000849 |
| 1  | -1.189385 | -4.755522 | -1.616659 |
| 8  | -0.008624 | -2.558159 | -1.993670 |
| 1  | 0.073709  | -1.885005 | -2.678609 |
| 53 | 1.948112  | -0.672118 | 0.252565  |
| 1  | -0.031338 | -3.529676 | 0.271611  |
| 1  | -2.752083 | -4.391611 | -0.845093 |
| 16 | -1.853400 | -2.897714 | 1.607966  |
| 1  | -2.975546 | -2.279545 | 1.157731  |
| 8  | -4.524188 | -0.978900 | 0.616616  |
| 8  | 4.179225  | -0.956219 | 0.740069  |
| 8  | -3.802260 | 1.355874  | 0.179857  |
| 8  | -5.468392 | 0.902372  | 1.963961  |
| 8  | 6.621681  | -0.860297 | 0.479172  |
| 8  | 5.160820  | -0.567681 | -1.528520 |
| 16 | 5.350076  | -0.420968 | -0.086130 |
| 16 | -4.867482 | 0.455942  | 0.698844  |
| 8  | 5.190687  | 1.197775  | 0.254513  |
| 8  | -6.092804 | 0.552288  | -0.450781 |
| 6  | 6.161378  | 2.064318  | -0.367490 |
| 1  | 6.089517  | 1.959738  | -1.454636 |
| 1  | 7.164455  | 1.761780  | -0.050202 |
| 6  | 5.847313  | 3.480706  | 0.075343  |
| 1  | 5.910087  | 3.568484  | 1.162325  |
| 1  | 6.563015  | 4.177271  | -0.371779 |
| 1  | 4.841575  | 3.769838  | -0.237961 |
| 6  | -6.704509 | 1.839772  | -0.594959 |
| 1  | -7.134540 | 2.146772  | 0.364535  |
| 1  | -5.943205 | 2.574046  | -0.882742 |
| 6  | -7.777425 | 1.717714  | -1.663582 |
| 1  | -8.527697 | 0.978150  | -1.372853 |
| 1  | -8.276692 | 2.681442  | -1.807980 |
| 1  | -7.340651 | 1.407189  | -2.616191 |
| 6  | -0.763203 | 1.621031  | 0.599126  |
| 6  | -0.161850 | 2.785418  | -0.207678 |
| 1  | -0.461776 | 1.671980  | 1.651443  |
| 1  | -1.868902 | 1.663948  | 0.578771  |
| 6  | -0.586376 | 4.143170  | 0.361071  |
| 1  | 0.930654  | 2.706147  | -0.212939 |
| 1  | -0.492784 | 2.703292  | -1.248439 |
| 6  | -0.022253 | 5.322887  | -0.435441 |
| 1  | -1.680124 | 4.196762  | 0.379920  |
| 1  | -0.256735 | 4.215804  | 1.404613  |
| 1  | -0.338343 | 6.278319  | -0.006772 |
| 1  | 1.072397  | 5.308174  | -0.446553 |
| 1  | -0.364305 | 5.296402  | -1.475022 |

55

Bu-EtSO4 RCS=4.0

|    |           |           |           |
|----|-----------|-----------|-----------|
| 6  | -0.475486 | 0.365741  | -0.070731 |
| 6  | -0.481661 | -0.823590 | -0.413359 |
| 6  | -1.026605 | -2.057475 | -1.078705 |
| 6  | -1.050152 | -3.302311 | -0.139569 |
| 6  | -2.400682 | -1.686394 | -1.659570 |
| 1  | -2.297072 | -0.828672 | -2.329838 |
| 1  | -2.780556 | -2.531748 | -2.235250 |
| 1  | -3.121285 | -1.417293 | -0.885645 |
| 6  | -1.627120 | -4.538902 | -0.838702 |
| 1  | -1.451910 | -5.416957 | -0.214504 |
| 1  | -1.146563 | -4.695643 | -1.807574 |
| 8  | -0.132480 | -2.445509 | -2.135287 |
| 1  | -0.117162 | -1.742494 | -2.794560 |
| 53 | 1.894559  | -0.675037 | 0.194903  |
| 1  | -0.003780 | -3.498067 | 0.105711  |
| 1  | -2.705568 | -4.449527 | -0.983145 |
| 16 | -1.822760 | -3.046060 | 1.524407  |
| 1  | -2.931020 | -2.357326 | 1.151631  |
| 8  | -4.467965 | -0.943374 | 0.777835  |
| 8  | 4.099309  | -1.035424 | 0.718956  |
| 8  | -3.765087 | 1.344970  | 0.119210  |
| 8  | -5.214332 | 1.034695  | 2.110893  |



S65

|    |           |           |           |
|----|-----------|-----------|-----------|
| 8  | 6.548631  | -0.983097 | 0.524982  |
| 8  | 5.148325  | -0.458753 | -1.479022 |
| 16 | 5.304471  | -0.455783 | -0.025525 |
| 16 | -4.775020 | 0.501108  | 0.813296  |
| 8  | 5.176992  | 1.125859  | 0.466413  |
| 8  | -6.127687 | 0.559508  | -0.187539 |
| 6  | 6.195381  | 2.017833  | -0.031420 |
| 1  | 6.163453  | 2.022185  | -1.125524 |
| 1  | 7.176160  | 1.653984  | 0.290860  |
| 6  | 5.903821  | 3.393378  | 0.537504  |
| 1  | 5.926089  | 3.372264  | 1.629370  |
| 1  | 6.655938  | 4.107123  | 0.187903  |
| 1  | 4.919702  | 3.743703  | 0.218086  |
| 6  | -6.735861 | 1.848453  | -0.329648 |
| 1  | -7.049469 | 2.212625  | 0.654679  |
| 1  | -6.003845 | 2.553192  | -0.741049 |
| 6  | -7.925512 | 1.691220  | -1.261432 |
| 1  | -8.646271 | 0.980992  | -0.848524 |
| 1  | -8.426603 | 2.655041  | -1.398946 |
| 1  | -7.604388 | 1.324473  | -2.239724 |
| 6  | -0.709067 | 1.729927  | 0.363432  |
| 6  | -0.084636 | 2.814445  | -0.531648 |
| 1  | -0.373892 | 1.836281  | 1.401176  |
| 1  | -1.811298 | 1.808332  | 0.374107  |
| 6  | -0.428208 | 4.223003  | -0.036493 |
| 1  | 1.002528  | 2.685149  | -0.565523 |
| 1  | -0.452439 | 2.685160  | -1.555275 |
| 6  | 0.159032  | 5.324065  | -0.923786 |
| 1  | -1.517204 | 4.329580  | 0.014813  |
| 1  | -0.059279 | 4.344170  | 0.989160  |
| 1  | -0.097578 | 6.317830  | -0.545505 |
| 1  | 1.250699  | 5.256614  | -0.970704 |
| 1  | -0.221207 | 5.250387  | -1.947713 |

55

Bu-EtSO4 RCS=4.2

|    |           |           |           |
|----|-----------|-----------|-----------|
| 6  | -0.478543 | 0.397451  | -0.164756 |
| 6  | -0.541845 | -0.807064 | -0.444414 |
| 6  | -1.093896 | -2.042827 | -1.102705 |
| 6  | -1.048645 | -3.325490 | -0.213543 |
| 6  | -2.497987 | -1.688857 | -1.618172 |
| 1  | -2.437810 | -0.823436 | -2.283631 |
| 1  | -2.889441 | -2.535353 | -2.184368 |
| 1  | -3.186551 | -1.434545 | -0.811192 |
| 6  | -1.537405 | -4.564259 | -0.975659 |
| 1  | -1.331554 | -5.453974 | -0.377618 |
| 1  | -1.023650 | -4.659412 | -1.934767 |
| 8  | -0.232441 | -2.372743 | -2.208339 |
| 1  | -0.248817 | -1.638421 | -2.832552 |
| 53 | 1.860969  | -0.683682 | 0.152687  |
| 1  | 0.004556  | -3.467846 | 0.037691  |
| 1  | -2.615112 | -4.528818 | -1.146511 |
| 16 | -1.869949 | -3.220848 | 1.451379  |
| 1  | -2.920176 | -2.422274 | 1.138305  |
| 8  | -4.400396 | -0.879787 | 0.914583  |
| 8  | 4.050524  | -1.090950 | 0.678823  |
| 8  | -3.725229 | 1.363761  | 0.091952  |
| 8  | -5.035613 | 1.172649  | 2.191523  |
| 8  | 6.501555  | -1.039082 | 0.515704  |
| 8  | 5.126820  | -0.326785 | -1.448032 |
| 16 | 5.267803  | -0.454725 | 0.001209  |
| 16 | -4.691480 | 0.567823  | 0.896319  |
| 8  | 5.143749  | 1.076255  | 0.631980  |
| 8  | -6.110397 | 0.591996  | -0.010787 |
| 6  | 6.172174  | 2.003580  | 0.227279  |
| 1  | 6.148567  | 2.110705  | -0.861779 |
| 1  | 7.147869  | 1.603756  | 0.520959  |
| 6  | 5.885165  | 3.321524  | 0.921068  |
| 1  | 5.899915  | 3.197797  | 2.006199  |
| 1  | 6.643991  | 4.059807  | 0.644609  |
| 1  | 4.905346  | 3.706860  | 0.630044  |

S66

|   |           |          |           |
|---|-----------|----------|-----------|
| 6 | -6.718590 | 1.878260 | -0.172827 |
| 1 | -6.961230 | 2.292185 | 0.811904  |
| 1 | -6.012425 | 2.555682 | -0.667138 |
| 6 | -7.970751 | 1.688374 | -1.012093 |
| 1 | -8.665690 | 1.005549 | -0.516883 |
| 1 | -8.474122 | 2.649300 | -1.161196 |
| 1 | -7.720300 | 1.272295 | -1.991302 |
| 6 | -0.664696 | 1.789202 | 0.206478  |
| 6 | -0.031941 | 2.806509 | -0.758801 |
| 1 | -0.296023 | 1.937353 | 1.227480  |
| 1 | -1.762596 | 1.898971 | 0.244205  |
| 6 | -0.310460 | 4.248905 | -0.323794 |
| 1 | 1.048530  | 2.637089 | -0.819173 |
| 1 | -0.435938 | 2.641890 | -1.763641 |
| 6 | 0.284603  | 5.283888 | -1.282560 |
| 1 | -1.392880 | 4.397438 | -0.243759 |
| 1 | 0.095888  | 4.406219 | 0.682605  |
| 1 | 0.075550  | 6.303430 | -0.945885 |
| 1 | 1.371023  | 5.174439 | -1.360781 |
| 1 | -0.131961 | 5.174787 | -2.289040 |

55

Bu-EtSO4 RCS=4.4

|    |           |           |           |
|----|-----------|-----------|-----------|
| 6  | -0.723859 | 0.706871  | -0.352596 |
| 6  | -0.607134 | -0.430205 | -0.822913 |
| 6  | -1.001988 | -1.742935 | -1.441394 |
| 6  | -0.537413 | -2.956048 | -0.562119 |
| 6  | -2.511968 | -1.699136 | -1.720560 |
| 1  | -2.714343 | -0.936656 | -2.478922 |
| 1  | -2.830910 | -2.670059 | -2.104241 |
| 1  | -3.089027 | -1.453392 | -0.831024 |
| 6  | -0.341241 | -4.234644 | -1.385860 |
| 1  | -0.040732 | -5.047862 | -0.720045 |
| 1  | 0.434444  | -4.094166 | -2.137613 |
| 8  | -0.284522 | -1.888786 | -2.680703 |
| 1  | -0.480087 | -1.121471 | -3.229990 |
| 53 | 1.813658  | 0.175865  | -0.789289 |
| 1  | 0.422386  | -2.682217 | -0.123148 |
| 1  | -1.264604 | -4.534126 | -1.886927 |
| 16 | -1.675024 | -3.423571 | 0.832525  |
| 1  | -2.081268 | -2.187555 | 1.222683  |
| 8  | -2.988211 | -0.365491 | 1.411969  |
| 8  | 4.076916  | 0.291470  | -1.046220 |
| 8  | -4.082174 | 1.837635  | 1.181026  |
| 8  | -5.018401 | 0.169971  | 2.772483  |
| 8  | 6.432938  | 0.651572  | -0.458283 |
| 8  | 4.647486  | 1.771879  | 0.887711  |
| 16 | 5.072950  | 0.638074  | 0.068932  |
| 16 | -4.242122 | 0.409307  | 1.549718  |
| 8  | 4.905923  | -0.720658 | 0.998521  |
| 8  | -5.153181 | -0.260797 | 0.293951  |
| 6  | 5.632307  | -0.727750 | 2.246984  |
| 1  | 5.299661  | 0.117695  | 2.856106  |
| 1  | 6.701097  | -0.614490 | 2.037895  |
| 6  | 5.339315  | -2.052223 | 2.924937  |
| 1  | 5.667624  | -2.886988 | 2.301656  |
| 1  | 5.867739  | -2.103422 | 3.881693  |
| 1  | 4.269234  | -2.160554 | 3.114212  |
| 6  | -6.499572 | 0.216981  | 0.182408  |
| 1  | -7.037402 | 0.002852  | 1.112066  |
| 1  | -6.489104 | 1.302888  | 0.032713  |
| 6  | -7.141985 | -0.490942 | -0.998220 |
| 1  | -7.138195 | -1.573255 | -0.846720 |
| 1  | -8.179145 | -0.160524 | -1.115945 |
| 1  | -6.602256 | -0.271211 | -1.923008 |
| 6  | -1.013527 | 2.000425  | 0.236071  |
| 6  | -0.797580 | 3.201405  | -0.702986 |
| 1  | -0.424261 | 2.110269  | 1.153048  |
| 1  | -2.069228 | 1.947209  | 0.551475  |
| 6  | -1.178024 | 4.520574  | -0.022681 |
| 1  | 0.247730  | 3.236638  | -1.028079 |

S67

|   |           |          |           |
|---|-----------|----------|-----------|
| 1 | -1.408135 | 3.063155 | -1.602306 |
| 6 | -1.003463 | 5.732886 | -0.941501 |
| 1 | -2.215584 | 4.459230 | 0.321905  |
| 1 | -0.562198 | 4.651544 | 0.875088  |
| 1 | -1.277080 | 6.660396 | -0.430159 |
| 1 | 0.033842  | 5.831196 | -1.277609 |
| 1 | -1.634329 | 5.647184 | -1.832343 |

55

Bu-EtSO4 RCS=4.6

|    |           |           |           |
|----|-----------|-----------|-----------|
| 6  | -0.659128 | 0.669586  | -0.396481 |
| 6  | -0.638161 | -0.495113 | -0.810200 |
| 6  | -1.111803 | -1.810655 | -1.366705 |
| 6  | -0.759636 | -3.005797 | -0.393286 |
| 6  | -2.605545 | -1.669132 | -1.695249 |
| 1  | -2.727259 | -0.928532 | -2.492196 |
| 1  | -2.983462 | -2.631971 | -2.043621 |
| 1  | -3.186640 | -1.342270 | -0.835086 |
| 6  | -0.353098 | -4.278675 | -1.147011 |
| 1  | -0.134648 | -5.067080 | -0.422451 |
| 1  | 0.534382  | -4.103914 | -1.753475 |
| 8  | -0.381564 | -2.069953 | -2.579500 |
| 1  | -0.545626 | -1.338423 | -3.185040 |
| 53 | 1.824318  | -0.034567 | -0.800772 |
| 1  | 0.084164  | -2.687564 | 0.218541  |
| 1  | -1.154114 | -4.628986 | -1.801896 |
| 16 | -2.104790 | -3.536950 | 0.780522  |
| 1  | -2.470716 | -2.312410 | 1.244289  |
| 8  | -3.014285 | -0.345762 | 1.410326  |
| 8  | 4.093595  | -0.089167 | -1.045967 |
| 8  | -3.901321 | 1.952825  | 1.200666  |
| 8  | -4.972510 | 0.369928  | 2.792971  |
| 8  | 6.458152  | 0.356371  | -0.556705 |
| 8  | 4.698032  | 1.818945  | 0.452561  |
| 16 | 5.098100  | 0.505832  | -0.051015 |
| 16 | -4.188184 | 0.543315  | 1.563958  |
| 8  | 4.902839  | -0.569092 | 1.192222  |
| 8  | -5.169333 | -0.032470 | 0.313528  |
| 6  | 5.647118  | -0.284994 | 2.396847  |
| 1  | 5.346211  | 0.695463  | 2.777475  |
| 1  | 6.715249  | -0.259054 | 2.157777  |
| 6  | 5.329259  | -1.388416 | 3.387383  |
| 1  | 5.625731  | -2.361826 | 2.990354  |
| 1  | 5.870459  | -1.214301 | 4.322278  |
| 1  | 4.259598  | -1.414515 | 3.606128  |
| 6  | -6.467409 | 0.566831  | 0.218486  |
| 1  | -7.013790 | 0.395912  | 1.152107  |
| 1  | -6.359370 | 1.648359  | 0.075780  |
| 6  | -7.182700 | -0.070940 | -0.960212 |
| 1  | -7.276177 | -1.150166 | -0.815667 |
| 1  | -8.186453 | 0.353460  | -1.065576 |
| 1  | -6.633671 | 0.105277  | -1.888822 |
| 6  | -0.873835 | 1.997662  | 0.148848  |
| 6  | -0.632673 | 3.149338  | -0.843883 |
| 1  | -0.250416 | 2.117277  | 1.041634  |
| 1  | -1.920767 | 2.001337  | 0.498300  |
| 6  | -0.926428 | 4.511657  | -0.207202 |
| 1  | 0.402103  | 3.120433  | -1.201837 |
| 1  | -1.278100 | 3.005992  | -1.717678 |
| 6  | -0.724126 | 5.676328  | -1.180378 |
| 1  | -1.953897 | 4.515901  | 0.171643  |
| 1  | -0.275575 | 4.647618  | 0.664721  |
| 1  | -0.935739 | 6.635953  | -0.699789 |
| 1  | 0.305123  | 5.709496  | -1.551965 |
| 1  | -1.387297 | 5.586356  | -2.047007 |

55

Bu-EtSO4 RCS=4.8

|   |           |           |           |
|---|-----------|-----------|-----------|
| 6 | -0.721383 | 0.219193  | 0.745515  |
| 6 | -0.097134 | -0.690105 | 0.170706  |
| 6 | -0.236131 | -2.090708 | -0.407638 |

S68

|    |           |           |           |
|----|-----------|-----------|-----------|
| 6  | -1.093899 | -2.863824 | 0.642553  |
| 6  | -0.899085 | -1.934995 | -1.782918 |
| 1  | -0.295537 | -1.271999 | -2.410700 |
| 1  | -0.963495 | -2.915709 | -2.254571 |
| 1  | -1.899735 | -1.512413 | -1.677396 |
| 6  | -0.285149 | -3.248483 | 1.882966  |
| 1  | -0.955678 | -3.635766 | 2.651821  |
| 1  | 0.241614  | -2.378956 | 2.285637  |
| 8  | 1.010310  | -2.756999 | -0.509911 |
| 1  | 1.556339  | -2.303124 | -1.162558 |
| 53 | 1.837321  | 0.589739  | -0.157325 |
| 1  | -1.922758 | -2.212140 | 0.908816  |
| 1  | 0.461960  | -4.009142 | 1.650826  |
| 16 | -1.915835 | -4.363428 | -0.044130 |
| 1  | -3.053287 | -3.727700 | -0.396135 |
| 8  | -3.647620 | -1.218136 | -0.027653 |
| 8  | 3.853108  | 1.551759  | -0.792615 |
| 8  | -4.483509 | 0.615899  | 1.406687  |
| 8  | -6.062229 | -1.131440 | 0.610128  |
| 8  | 6.250418  | 2.098723  | -0.764766 |
| 8  | 5.113587  | 1.448807  | 1.364179  |
| 16 | 5.195700  | 1.345730  | -0.092608 |
| 16 | -4.812767 | -0.398737 | 0.370724  |
| 8  | 5.429516  | -0.260749 | -0.445982 |
| 8  | -5.066463 | 0.491424  | -1.036523 |
| 6  | 6.607804  | -0.864532 | 0.126785  |
| 1  | 6.557266  | -0.780978 | 1.216579  |
| 1  | 7.492820  | -0.325825 | -0.227427 |
| 6  | 6.629767  | -2.314390 | -0.318510 |
| 1  | 6.671301  | -2.383888 | -1.407928 |
| 1  | 7.509482  | -2.816663 | 0.095249  |
| 1  | 5.736732  | -2.838666 | 0.028938  |
| 6  | -6.238792 | 1.317595  | -1.046370 |
| 1  | -7.123992 | 0.690894  | -0.897341 |
| 1  | -6.184614 | 2.037917  | -0.221646 |
| 6  | -6.286327 | 2.026815  | -2.388671 |
| 1  | -6.331700 | 1.301988  | -3.205217 |
| 1  | -7.171882 | 2.668099  | -2.443768 |
| 1  | -5.399315 | 2.649139  | -2.531475 |
| 6  | -1.462190 | 1.266270  | 1.391097  |
| 6  | -1.675093 | 2.538607  | 0.543104  |
| 1  | -1.012234 | 1.498775  | 2.363538  |
| 1  | -2.463635 | 0.827898  | 1.589820  |
| 6  | -2.540025 | 3.562547  | 1.284168  |
| 1  | -0.703937 | 2.974729  | 0.285416  |
| 1  | -2.163190 | 2.250882  | -0.392492 |
| 6  | -2.787149 | 4.828579  | 0.459105  |
| 1  | -3.492561 | 3.090872  | 1.543420  |
| 1  | -2.052057 | 3.833497  | 2.229197  |
| 1  | -3.404539 | 5.544846  | 1.009224  |
| 1  | -1.847483 | 5.327832  | 0.200300  |
| 1  | -3.305692 | 4.592671  | -0.475351 |

55

Bu-EtSO4 RCS=5.0

|    |           |           |           |
|----|-----------|-----------|-----------|
| 6  | -0.725584 | 0.244638  | 0.692840  |
| 6  | -0.130155 | -0.712764 | 0.174274  |
| 6  | -0.158724 | -2.117472 | -0.405576 |
| 6  | -1.065950 | -2.962366 | 0.540532  |
| 6  | -0.708790 | -1.993139 | -1.833801 |
| 1  | -0.083635 | -1.309690 | -2.415761 |
| 1  | -0.692283 | -2.977021 | -2.302967 |
| 1  | -1.729667 | -1.606833 | -1.811178 |
| 6  | -0.430885 | -3.190485 | 1.913870  |
| 1  | -1.154388 | -3.664078 | 2.579084  |
| 1  | -0.122647 | -2.240736 | 2.358773  |
| 8  | 1.125806  | -2.721077 | -0.392116 |
| 1  | 1.725267  | -2.198567 | -0.938436 |
| 53 | 1.806609  | 0.647390  | -0.148343 |
| 1  | -2.009103 | -2.426036 | 0.632784  |
| 1  | 0.452453  | -3.827539 | 1.842177  |

S69

|    |           |           |           |
|----|-----------|-----------|-----------|
| 16 | -1.505937 | -4.616739 | -0.184185 |
| 1  | -2.695263 | -4.240026 | -0.694943 |
| 8  | -3.452987 | -1.000369 | -0.102785 |
| 8  | 3.803100  | 1.629216  | -0.762228 |
| 8  | -4.489735 | 0.572612  | 1.500974  |
| 8  | -5.811536 | -1.350430 | 0.639833  |
| 8  | 6.202083  | 2.163080  | -0.736903 |
| 8  | 5.064977  | 1.521515  | 1.394959  |
| 16 | 5.146649  | 1.415611  | -0.060998 |
| 16 | -4.709472 | -0.407558 | 0.406674  |
| 8  | 5.368418  | -0.191866 | -0.413345 |
| 8  | -5.178605 | 0.522749  | -0.917210 |
| 6  | 6.540733  | -0.805705 | 0.162840  |
| 1  | 6.488317  | -0.720092 | 1.252278  |
| 1  | 7.430748  | -0.274883 | -0.190556 |
| 6  | 6.550871  | -2.256057 | -0.280807 |
| 1  | 6.592938  | -2.327364 | -1.370053 |
| 1  | 7.426165  | -2.764749 | 0.134366  |
| 1  | 5.653691  | -2.773054 | 0.066814  |
| 6  | -6.456532 | 1.163133  | -0.802419 |
| 1  | -7.228608 | 0.403680  | -0.641299 |
| 1  | -6.450508 | 1.836718  | 0.062516  |
| 6  | -6.700751 | 1.929931  | -2.090677 |
| 1  | -6.697631 | 1.252371  | -2.948091 |
| 1  | -7.671678 | 2.434153  | -2.049767 |
| 1  | -5.925689 | 2.684514  | -2.246880 |
| 6  | -1.452153 | 1.330679  | 1.301309  |
| 6  | -1.751258 | 2.518085  | 0.363846  |
| 1  | -0.932237 | 1.656768  | 2.209998  |
| 1  | -2.418667 | 0.892202  | 1.614794  |
| 6  | -2.587128 | 3.588963  | 1.071385  |
| 1  | -0.811070 | 2.947864  | 0.001245  |
| 1  | -2.296304 | 2.139630  | -0.505457 |
| 6  | -2.919992 | 4.772322  | 0.158428  |
| 1  | -3.509315 | 3.125875  | 1.435440  |
| 1  | -2.043461 | 3.951049  | 1.953545  |
| 1  | -3.517358 | 5.522934  | 0.684542  |
| 1  | -2.011967 | 5.264328  | -0.205944 |
| 1  | -3.492591 | 4.443884  | -0.714383 |

55

Bu-EtSO4 RCS=5.2

|    |           |           |           |
|----|-----------|-----------|-----------|
| 6  | -0.670511 | 0.335298  | 0.676739  |
| 6  | -0.191307 | -0.706569 | 0.208172  |
| 6  | -0.159313 | -2.107967 | -0.383182 |
| 6  | -1.110612 | -3.020741 | 0.458400  |
| 6  | -0.607076 | -1.976879 | -1.846799 |
| 1  | 0.050186  | -1.285463 | -2.381127 |
| 1  | -0.550422 | -2.957525 | -2.319553 |
| 1  | -1.630283 | -1.598064 | -1.890692 |
| 6  | -0.642112 | -3.183291 | 1.904815  |
| 1  | -1.389850 | -3.736646 | 2.474382  |
| 1  | -0.507268 | -2.205641 | 2.375204  |
| 8  | 1.137060  | -2.682963 | -0.278708 |
| 1  | 1.769165  | -2.123652 | -0.746572 |
| 53 | 1.803487  | 0.698265  | -0.140597 |
| 1  | -2.099374 | -2.564832 | 0.424124  |
| 1  | 0.308514  | -3.717288 | 1.957307  |
| 16 | -1.302760 | -4.735351 | -0.292967 |
| 1  | -2.507132 | -4.509798 | -0.854479 |
| 8  | -3.410300 | -0.913432 | -0.135227 |
| 8  | 3.800611  | 1.627493  | -0.767996 |
| 8  | -4.425701 | 0.668790  | 1.477354  |
| 8  | -5.663518 | -1.387998 | 0.827683  |
| 8  | 6.211170  | 2.099052  | -0.758426 |
| 8  | 5.063933  | 1.534803  | 1.390635  |
| 16 | 5.141829  | 1.393059  | -0.061720 |
| 16 | -4.658636 | -0.381961 | 0.454146  |
| 8  | 5.317325  | -0.225627 | -0.379280 |
| 8  | -5.308242 | 0.439414  | -0.865804 |
| 6  | 6.472581  | -0.861271 | 0.210144  |

S70

|   |           |           |           |
|---|-----------|-----------|-----------|
| 1 | 6.421460  | -0.752933 | 1.297497  |
| 1 | 7.376694  | -0.361913 | -0.152881 |
| 6 | 6.442318  | -2.319275 | -0.205967 |
| 1 | 6.482393  | -2.412535 | -1.293573 |
| 1 | 7.303416  | -2.843574 | 0.219217  |
| 1 | 5.531680  | -2.805120 | 0.151306  |
| 6 | -6.606445 | 1.011084  | -0.660360 |
| 1 | -7.312655 | 0.219021  | -0.389799 |
| 1 | -6.562155 | 1.729627  | 0.166418  |
| 6 | -7.015552 | 1.692631  | -1.954843 |
| 1 | -7.050319 | 0.971334  | -2.775148 |
| 1 | -8.007571 | 2.142963  | -1.845864 |
| 1 | -6.305394 | 2.479951  | -2.220097 |
| 6 | -1.378391 | 1.463282  | 1.246966  |
| 6 | -1.678606 | 2.601976  | 0.253120  |
| 1 | -0.836297 | 1.833343  | 2.124599  |
| 1 | -2.340784 | 1.048857  | 1.595153  |
| 6 | -2.523725 | 3.701034  | 0.904616  |
| 1 | -0.740257 | 3.019989  | -0.127906 |
| 1 | -2.219061 | 2.179623  | -0.598799 |
| 6 | -2.858471 | 4.838053  | -0.064791 |
| 1 | -3.445653 | 3.250368  | 1.284779  |
| 1 | -1.987259 | 4.107217  | 1.771895  |
| 1 | -3.462999 | 5.609161  | 0.422138  |
| 1 | -1.951291 | 5.317788  | -0.447351 |
| 1 | -3.424586 | 4.465297  | -0.923923 |

55

Bu-EtSO4 RCS=5.4

|    |           |           |           |
|----|-----------|-----------|-----------|
| 6  | -0.599931 | 0.421608  | 0.739777  |
| 6  | -0.288355 | -0.701005 | 0.314563  |
| 6  | -0.169692 | -2.097864 | -0.289575 |
| 6  | -1.141572 | -3.097239 | 0.440281  |
| 6  | -0.504516 | -1.964048 | -1.782770 |
| 1  | 0.173377  | -1.253604 | -2.262628 |
| 1  | -0.388092 | -2.939543 | -2.255530 |
| 1  | -1.530716 | -1.609498 | -1.899885 |
| 6  | -0.824961 | -3.235015 | 1.928104  |
| 1  | -1.576361 | -3.860746 | 2.411045  |
| 1  | -0.838631 | -2.252859 | 2.409079  |
| 8  | 1.140151  | -2.618429 | -0.082494 |
| 1  | 1.784225  | -2.021331 | -0.483313 |
| 53 | 1.782914  | 0.791206  | -0.082977 |
| 1  | -2.152239 | -2.716739 | 0.299880  |
| 1  | 0.160265  | -3.677529 | 2.087217  |
| 16 | -1.132740 | -4.846071 | -0.327775 |
| 1  | -2.298428 | -4.705734 | -0.989676 |
| 8  | -3.394706 | -0.979547 | -0.191188 |
| 8  | 3.773328  | 1.671669  | -0.744426 |
| 8  | -4.346541 | 0.683244  | 1.384368  |
| 8  | -5.622649 | -1.383526 | 0.855881  |
| 8  | 6.201581  | 2.022423  | -0.818447 |
| 8  | 5.109194  | 1.482504  | 1.365791  |
| 16 | 5.128091  | 1.358112  | -0.089347 |
| 16 | -4.616378 | -0.405965 | 0.412826  |
| 8  | 5.206062  | -0.260851 | -0.435591 |
| 8  | -5.295985 | 0.369273  | -0.922119 |
| 6  | 6.345833  | -0.967621 | 0.103453  |
| 1  | 6.338578  | -0.873183 | 1.193154  |
| 1  | 7.261866  | -0.511660 | -0.285569 |
| 6  | 6.221297  | -2.414906 | -0.331464 |
| 1  | 6.217238  | -2.493237 | -1.420917 |
| 1  | 7.067600  | -2.990924 | 0.054553  |
| 1  | 5.299636  | -2.857593 | 0.052567  |
| 6  | -6.574538 | 0.975550  | -0.698894 |
| 1  | -7.286967 | 0.210792  | -0.371371 |
| 1  | -6.488961 | 1.727571  | 0.094255  |
| 6  | -7.014150 | 1.610174  | -2.007361 |
| 1  | -7.090808 | 0.855680  | -2.794339 |
| 1  | -7.992873 | 2.085725  | -1.885400 |
| 1  | -6.297730 | 2.370146  | -2.329576 |

S71

|   |           |          |           |
|---|-----------|----------|-----------|
| 6 | -1.309352 | 1.569846 | 1.296391  |
| 6 | -1.634094 | 2.668911 | 0.267850  |
| 1 | -0.745876 | 1.977339 | 2.142563  |
| 1 | -2.259611 | 1.160925 | 1.672525  |
| 6 | -2.492126 | 3.775802 | 0.888602  |
| 1 | -0.706680 | 3.090008 | -0.136137 |
| 1 | -2.176018 | 2.210677 | -0.564425 |
| 6 | -2.848034 | 4.877200 | -0.113901 |
| 1 | -3.406467 | 3.323607 | 1.285050  |
| 1 | -1.958947 | 4.216506 | 1.741014  |
| 1 | -3.463063 | 5.653512 | 0.351230  |
| 1 | -1.949702 | 5.358955 | -0.514451 |
| 1 | -3.410962 | 4.469157 | -0.958924 |

53

Ph-EtSO4 lec

|    |           |           |           |
|----|-----------|-----------|-----------|
| 6  | -2.077300 | 4.493401  | -2.613898 |
| 6  | -2.441992 | 3.150166  | -2.698196 |
| 6  | -1.917558 | 2.221790  | -1.806142 |
| 6  | -1.032405 | 2.661661  | -0.799214 |
| 6  | -0.679070 | 4.024460  | -0.706310 |
| 6  | -1.194555 | 4.929700  | -1.620038 |
| 1  | -2.486244 | 5.208889  | -3.319252 |
| 1  | -3.143023 | 2.818851  | -3.455075 |
| 1  | -2.214996 | 1.176361  | -1.830471 |
| 1  | 0.001959  | 4.347151  | 0.071850  |
| 1  | -0.918065 | 5.975996  | -1.558862 |
| 6  | -0.550103 | 1.721168  | 0.134591  |
| 6  | -0.167286 | 0.854509  | 0.938717  |
| 6  | -0.547174 | -0.170344 | 2.004484  |
| 6  | -1.898961 | 0.319667  | 2.615750  |
| 6  | -0.645531 | -1.526319 | 1.295885  |
| 1  | 0.321671  | -1.786439 | 0.856091  |
| 1  | -0.921719 | -2.282674 | 2.030162  |
| 1  | -1.394378 | -1.492554 | 0.501370  |
| 6  | -1.738135 | 1.595313  | 3.446910  |
| 1  | -2.721895 | 1.965494  | 3.738984  |
| 1  | -1.228238 | 2.377354  | 2.877135  |
| 8  | 0.403979  | -0.191297 | 3.055463  |
| 1  | 1.205588  | -0.630765 | 2.746625  |
| 53 | 2.087254  | 0.888309  | 0.181878  |
| 1  | -2.590091 | 0.479716  | 1.788420  |
| 1  | -1.154073 | 1.404342  | 4.348745  |
| 16 | -2.734753 | -0.978348 | 3.644267  |
| 1  | -3.638942 | -1.293819 | 2.687734  |
| 8  | -4.495369 | -0.574816 | 0.780028  |
| 8  | 4.350972  | 0.711303  | -0.223970 |
| 8  | -2.943150 | -0.664264 | -1.154224 |
| 8  | -5.355842 | -0.254560 | -1.544419 |
| 8  | 6.585886  | -0.310813 | -0.183407 |
| 8  | 4.748317  | -1.307069 | 1.191962  |
| 16 | 5.161372  | -0.568725 | -0.001858 |
| 16 | -4.337009 | -0.845434 | -0.660787 |
| 8  | 4.640893  | -1.440474 | -1.310043 |
| 8  | -4.592159 | -2.505807 | -0.711127 |
| 6  | 5.163731  | -2.781679 | -1.423469 |
| 1  | 4.885760  | -3.348778 | -0.530036 |
| 1  | 6.255654  | -2.734092 | -1.486298 |
| 6  | 4.563729  | -3.389365 | -2.676739 |
| 1  | 4.840735  | -2.807978 | -3.559002 |
| 1  | 4.930236  | -4.412356 | -2.804809 |
| 1  | 3.474084  | -3.417719 | -2.608654 |
| 6  | -4.546429 | -3.104011 | -2.012759 |
| 1  | -5.319952 | -2.655110 | -2.645317 |
| 1  | -3.569484 | -2.907450 | -2.468811 |
| 6  | -4.776980 | -4.595079 | -1.836867 |
| 1  | -5.748606 | -4.782465 | -1.372881 |
| 1  | -4.753330 | -5.097005 | -2.809661 |
| 1  | -4.002966 | -5.033073 | -1.201808 |

Ph-EtSO4 1r

|    |           |           |           |
|----|-----------|-----------|-----------|
| 6  | 2.098165  | -2.988839 | -3.763857 |
| 6  | 2.918855  | -1.961186 | -3.302805 |
| 6  | 2.778523  | -1.477757 | -2.004053 |
| 6  | 1.805478  | -2.010730 | -1.145214 |
| 6  | 0.991198  | -3.051059 | -1.616335 |
| 6  | 1.135757  | -3.532389 | -2.914126 |
| 1  | 2.207291  | -3.363485 | -4.775875 |
| 1  | 3.670397  | -1.527566 | -3.953456 |
| 1  | 3.419555  | -0.669494 | -1.672019 |
| 1  | 0.244667  | -3.481657 | -0.961994 |
| 1  | 0.492693  | -4.334016 | -3.260305 |
| 6  | 1.663171  | -1.514332 | 0.239065  |
| 6  | 0.575828  | -1.180182 | 0.948524  |
| 6  | 0.821740  | -0.676880 | 2.376666  |
| 6  | 2.217628  | -1.225591 | 2.774805  |
| 6  | 0.707020  | 0.852453  | 2.434043  |
| 1  | -0.294433 | 1.153474  | 2.119930  |
| 1  | 0.860295  | 1.199689  | 3.457841  |
| 1  | 1.426870  | 1.340442  | 1.774178  |
| 6  | 2.961808  | -0.495633 | 3.885131  |
| 1  | 3.890656  | -1.016103 | 4.133629  |
| 1  | 2.337971  | -0.476980 | 4.782709  |
| 8  | -0.070292 | -1.265328 | 3.328331  |
| 1  | -0.977670 | -1.122519 | 3.021807  |
| 53 | -1.424847 | -1.102256 | 0.239146  |
| 1  | 2.048946  | -2.263559 | 3.068315  |
| 1  | 3.209515  | 0.531983  | 3.613227  |
| 16 | 3.194259  | -1.331071 | 1.205366  |
| 1  | 3.875921  | 0.721251  | 0.951982  |
| 8  | 4.228407  | 1.660002  | 0.971772  |
| 8  | -3.987374 | -0.920783 | -0.623681 |
| 8  | 4.443956  | 1.563601  | -1.527461 |
| 8  | 4.578927  | 3.734060  | -0.272667 |
| 8  | -6.406481 | -0.348023 | -0.603114 |
| 8  | -5.010302 | 0.081447  | 1.412274  |
| 16 | -5.069458 | -0.077024 | -0.052472 |
| 16 | 4.024055  | 2.407075  | -0.418549 |
| 8  | -4.629099 | 1.437285  | -0.674740 |
| 8  | 2.403463  | 2.465477  | -0.394630 |
| 6  | -5.506897 | 2.513008  | -0.334265 |
| 1  | -5.563940 | 2.608496  | 0.756483  |
| 1  | -6.512836 | 2.297719  | -0.712766 |
| 6  | -4.948044 | 3.778803  | -0.962984 |
| 1  | -4.888495 | 3.675129  | -2.049575 |
| 1  | -5.592275 | 4.633333  | -0.730171 |
| 1  | -3.944800 | 3.987829  | -0.582436 |
| 6  | 1.726165  | 2.856995  | -1.636224 |
| 1  | 2.101864  | 3.839842  | -1.933722 |
| 1  | 1.978302  | 2.122775  | -2.403542 |
| 6  | 0.243233  | 2.885119  | -1.339579 |
| 1  | 0.013718  | 3.613185  | -0.559238 |
| 1  | -0.298800 | 3.168550  | -2.245839 |
| 1  | -0.117635 | 1.904848  | -1.024830 |

53

Ph-SO4 RCS=1.8

|   |          |           |           |
|---|----------|-----------|-----------|
| 6 | 1.800125 | 3.785615  | -2.288836 |
| 6 | 0.998065 | 3.463793  | -1.194763 |
| 6 | 0.789187 | 2.133727  | -0.841102 |
| 6 | 1.373229 | 1.096004  | -1.582587 |
| 6 | 2.192083 | 1.433055  | -2.672174 |
| 6 | 2.398443 | 2.763706  | -3.024839 |
| 1 | 1.956294 | 4.822575  | -2.565818 |
| 1 | 0.528063 | 4.249349  | -0.613422 |
| 1 | 0.168379 | 1.896041  | 0.012220  |
| 1 | 2.657331 | 0.644322  | -3.251645 |
| 1 | 3.023636 | 3.001088  | -3.878859 |
| 6 | 1.148964 | -0.319608 | -1.222831 |
| 6 | 0.027447 | -0.969670 | -0.871575 |
| 6 | 0.212078 | -2.436112 | -0.453303 |



S73

|    |           |           |           |
|----|-----------|-----------|-----------|
| 6  | 1.510430  | -2.902724 | -1.160568 |
| 6  | 0.261032  | -2.530915 | 1.079699  |
| 1  | -0.664449 | -2.129670 | 1.497679  |
| 1  | 0.350604  | -3.574814 | 1.387410  |
| 1  | 1.096996  | -1.961690 | 1.494279  |
| 6  | 2.231388  | -4.106935 | -0.570534 |
| 1  | 3.086490  | -4.388147 | -1.190994 |
| 1  | 1.543599  | -4.956141 | -0.541522 |
| 8  | -0.799311 | -3.305278 | -0.960266 |
| 1  | -1.664246 | -2.898282 | -0.799785 |
| 53 | -1.943533 | -0.187806 | -0.792779 |
| 1  | 1.221023  | -3.115684 | -2.191606 |
| 1  | 2.594115  | -3.918905 | 0.441668  |
| 16 | 2.587131  | -1.401334 | -1.262150 |
| 1  | 3.556165  | -1.276658 | 0.655351  |
| 8  | 3.989771  | -1.313162 | 1.560143  |
| 8  | -4.470759 | 0.763953  | -0.720717 |
| 8  | 6.100934  | -0.472959 | 0.487886  |
| 8  | 5.812030  | -0.518968 | 2.982112  |
| 8  | -6.917768 | 0.840086  | -0.289670 |
| 8  | -5.623201 | -1.215194 | 0.254116  |
| 16 | -5.619790 | 0.247538  | 0.068770  |
| 16 | 5.249871  | -0.352687 | 1.659919  |
| 8  | -5.244260 | 0.883084  | 1.593348  |
| 8  | 4.447543  | 1.061067  | 1.571707  |
| 6  | -6.185245 | 0.584936  | 2.627421  |
| 1  | -6.274164 | -0.502032 | 2.739590  |
| 1  | -7.168857 | 0.983374  | 2.352719  |
| 6  | -5.676628 | 1.224991  | 3.908610  |
| 1  | -5.585936 | 2.307678  | 3.788249  |
| 1  | -6.368828 | 1.023391  | 4.733104  |
| 1  | -4.694376 | 0.826202  | 4.174992  |
| 6  | 5.257930  | 2.264636  | 1.421431  |
| 1  | 5.963643  | 2.315923  | 2.255563  |
| 1  | 5.812208  | 2.190711  | 0.483107  |
| 6  | 4.300417  | 3.437087  | 1.424137  |
| 1  | 3.750907  | 3.487233  | 2.366211  |
| 1  | 4.865140  | 4.365793  | 1.301390  |
| 1  | 3.584619  | 3.355216  | 0.604379  |

53

Ph-SO4 RCS=2.0

|    |           |           |           |
|----|-----------|-----------|-----------|
| 6  | 1.968019  | 3.761966  | -2.493500 |
| 6  | 1.053294  | 3.508251  | -1.472378 |
| 6  | 0.786902  | 2.202277  | -1.071811 |
| 6  | 1.426376  | 1.117996  | -1.695582 |
| 6  | 2.356882  | 1.387868  | -2.712843 |
| 6  | 2.620826  | 2.694834  | -3.109650 |
| 1  | 2.170791  | 4.780776  | -2.805278 |
| 1  | 0.540414  | 4.329038  | -0.983175 |
| 1  | 0.077545  | 2.019146  | -0.276392 |
| 1  | 2.867413  | 0.563092  | -3.195131 |
| 1  | 3.336602  | 2.878860  | -3.903505 |
| 6  | 1.137045  | -0.261178 | -1.295023 |
| 6  | 0.054989  | -0.938409 | -0.915814 |
| 6  | 0.244780  | -2.393873 | -0.456103 |
| 6  | 1.515130  | -2.919364 | -1.176171 |
| 6  | 0.326821  | -2.433109 | 1.078210  |
| 1  | -0.581739 | -2.000665 | 1.502415  |
| 1  | 0.403356  | -3.467144 | 1.420104  |
| 1  | 1.181707  | -1.865960 | 1.453329  |
| 6  | 2.156999  | -4.168845 | -0.583252 |
| 1  | 2.977882  | -4.517267 | -1.215424 |
| 1  | 1.409541  | -4.964723 | -0.531450 |
| 8  | -0.790012 | -3.265029 | -0.908222 |
| 1  | -1.647861 | -2.861866 | -0.706430 |
| 53 | -1.929934 | -0.164830 | -0.824136 |
| 1  | 1.201631  | -3.124265 | -2.201488 |
| 1  | 2.552099  | -3.995527 | 0.419553  |
| 16 | 2.699028  | -1.510258 | -1.297825 |
| 1  | 3.593240  | -1.352040 | 0.629527  |

S74

|    |           |           |           |
|----|-----------|-----------|-----------|
| 8  | 4.008595  | -1.385444 | 1.546413  |
| 8  | -4.441008 | 0.757427  | -0.725085 |
| 8  | 6.033254  | -0.268037 | 0.566107  |
| 8  | 5.726702  | -0.507022 | 3.046920  |
| 8  | -6.882963 | 0.776741  | -0.265120 |
| 8  | -5.532696 | -1.245385 | 0.270631  |
| 16 | -5.568471 | 0.216043  | 0.081685  |
| 16 | 5.162212  | -0.313338 | 1.728929  |
| 8  | -5.188696 | 0.866208  | 1.597087  |
| 8  | 4.222207  | 1.016491  | 1.721113  |
| 6  | -6.109008 | 0.550325  | 2.645278  |
| 1  | -6.171617 | -0.537939 | 2.761605  |
| 1  | -7.104724 | 0.925804  | 2.382462  |
| 6  | -5.597268 | 1.205987  | 3.917108  |
| 1  | -5.532573 | 2.289987  | 3.792189  |
| 1  | -6.273538 | 0.991728  | 4.751491  |
| 1  | -4.602893 | 0.830066  | 4.171313  |
| 6  | 4.910671  | 2.301739  | 1.699328  |
| 1  | 5.572867  | 2.356639  | 2.568185  |
| 1  | 5.507081  | 2.357418  | 0.785763  |
| 6  | 3.839389  | 3.370507  | 1.742042  |
| 1  | 3.245113  | 3.288141  | 2.654206  |
| 1  | 4.311030  | 4.357232  | 1.722392  |
| 1  | 3.174678  | 3.286881  | 0.880530  |

53

Ph-SO4 RCS=2.2

|    |           |           |           |
|----|-----------|-----------|-----------|
| 6  | 2.235477  | -1.114845 | -4.593044 |
| 6  | 1.217159  | -0.365276 | -4.007113 |
| 6  | 0.973374  | -0.453629 | -2.640255 |
| 6  | 1.745444  | -1.305811 | -1.830580 |
| 6  | 2.775878  | -2.047548 | -2.431856 |
| 6  | 3.013960  | -1.955474 | -3.797995 |
| 1  | 2.423867  | -1.041467 | -5.658475 |
| 1  | 0.605742  | 0.292950  | -4.614391 |
| 1  | 0.175357  | 0.126895  | -2.198127 |
| 1  | 3.387687  | -2.692890 | -1.813948 |
| 1  | 3.813651  | -2.538034 | -4.242031 |
| 6  | 1.479048  | -1.420306 | -0.405664 |
| 6  | 0.482338  | -1.391770 | 0.458660  |
| 6  | 0.761750  | -1.449111 | 1.972248  |
| 6  | 2.105214  | -2.205372 | 2.171756  |
| 6  | 0.745433  | -0.023029 | 2.542178  |
| 1  | -0.226461 | 0.435408  | 2.346232  |
| 1  | 0.891634  | -0.054807 | 3.623502  |
| 1  | 1.513518  | 0.605623  | 2.089413  |
| 6  | 2.732106  | -2.060376 | 3.556790  |
| 1  | 3.593690  | -2.725133 | 3.657937  |
| 1  | 1.997241  | -2.339761 | 4.316215  |
| 8  | -0.182876 | -2.260778 | 2.669440  |
| 1  | -1.075744 | -1.949200 | 2.460906  |
| 53 | -1.571706 | -1.147515 | -0.114298 |
| 1  | 1.868806  | -3.256170 | 1.994830  |
| 1  | 3.067718  | -1.040002 | 3.752338  |
| 16 | 3.271767  | -1.728395 | 0.831769  |
| 1  | 3.947167  | 0.240377  | 1.264246  |
| 8  | 4.333671  | 1.120604  | 1.569320  |
| 8  | -4.117046 | -0.811422 | -0.775500 |
| 8  | 4.635509  | 1.744160  | -0.846128 |
| 8  | 4.864646  | 3.434503  | 0.996688  |
| 8  | -6.518919 | -0.238127 | -0.508863 |
| 8  | -5.019111 | -0.264038 | 1.479113  |
| 16 | -5.155251 | -0.098959 | 0.021462  |
| 16 | 4.236149  | 2.247866  | 0.456940  |
| 8  | -4.713761 | 1.505158  | -0.284699 |
| 8  | 2.617892  | 2.426779  | 0.471036  |
| 6  | -5.547960 | 2.494308  | 0.326142  |
| 1  | -5.549076 | 2.351258  | 1.412925  |
| 1  | -6.575620 | 2.379196  | -0.036964 |
| 6  | -4.988479 | 3.857758  | -0.043751 |
| 1  | -4.984456 | 3.991086  | -1.128672 |

S75

|   |           |          |           |
|---|-----------|----------|-----------|
| 1 | -5.599188 | 4.650214 | 0.401479  |
| 1 | -3.963214 | 3.965330 | 0.319602  |
| 6 | 2.030522  | 3.199159 | -0.621889 |
| 1 | 2.518771  | 4.177278 | -0.657765 |
| 1 | 2.220918  | 2.665670 | -1.555289 |
| 6 | 0.551475  | 3.325343 | -0.326121 |
| 1 | 0.385151  | 3.855834 | 0.613439  |
| 1 | 0.067883  | 3.886549 | -1.130432 |
| 1 | 0.076252  | 2.345074 | -0.262224 |

53

Ph-SO4 RCS=2.4

|    |           |           |           |
|----|-----------|-----------|-----------|
| 6  | 2.201774  | -1.131947 | -4.627988 |
| 6  | 1.227251  | -0.320014 | -4.050400 |
| 6  | 0.959264  | -0.403059 | -2.688141 |
| 6  | 1.661571  | -1.316162 | -1.879624 |
| 6  | 2.647743  | -2.123358 | -2.471395 |
| 6  | 2.911079  | -2.032182 | -3.832083 |
| 1  | 2.411013  | -1.060797 | -5.689652 |
| 1  | 0.670151  | 0.381980  | -4.660793 |
| 1  | 0.192895  | 0.220340  | -2.247117 |
| 1  | 3.207602  | -2.806699 | -1.845404 |
| 1  | 3.677016  | -2.660878 | -4.272396 |
| 6  | 1.354823  | -1.423305 | -0.473873 |
| 6  | 0.421354  | -1.384166 | 0.439063  |
| 6  | 0.724877  | -1.410718 | 1.950427  |
| 6  | 2.045466  | -2.206701 | 2.170468  |
| 6  | 0.757679  | 0.033472  | 2.471505  |
| 1  | -0.201501 | 0.516062  | 2.269686  |
| 1  | 0.913787  | 0.032138  | 3.551764  |
| 1  | 1.541194  | 0.620553  | 1.991320  |
| 6  | 2.613979  | -2.091869 | 3.586027  |
| 1  | 3.442135  | -2.791972 | 3.719397  |
| 1  | 1.835426  | -2.340762 | 4.311739  |
| 8  | -0.240914 | -2.168808 | 2.676108  |
| 1  | -1.123282 | -1.818439 | 2.486612  |
| 53 | -1.652881 | -1.128838 | -0.120873 |
| 1  | 1.779924  | -3.248373 | 1.980869  |
| 1  | 2.985661  | -1.087400 | 3.798387  |
| 16 | 3.294539  | -1.771239 | 0.895960  |
| 1  | 3.982678  | 0.149311  | 1.318294  |
| 8  | 4.390293  | 1.030642  | 1.617351  |
| 8  | -4.169467 | -0.795448 | -0.735862 |
| 8  | 4.780564  | 1.592686  | -0.799963 |
| 8  | 5.050702  | 3.304462  | 1.016166  |
| 8  | -6.557521 | -0.192708 | -0.433780 |
| 8  | -5.017456 | -0.186357 | 1.524538  |
| 16 | -5.184237 | -0.051302 | 0.067932  |
| 16 | 4.378482  | 2.136433  | 0.486568  |
| 8  | -4.731876 | 1.536536  | -0.286471 |
| 8  | 2.769306  | 2.401260  | 0.454914  |
| 6  | -5.538620 | 2.551844  | 0.320551  |
| 1  | -5.514230 | 2.434631  | 1.409984  |
| 1  | -6.576020 | 2.441274  | -0.014878 |
| 6  | -4.970535 | 3.897690  | -0.096704 |
| 1  | -4.992194 | 4.004604  | -1.184273 |
| 1  | -5.559419 | 4.708840  | 0.344043  |
| 1  | -3.935203 | 3.999813  | 0.238351  |
| 6  | 2.261060  | 3.212260  | -0.646405 |
| 1  | 2.805510  | 4.160932  | -0.661641 |
| 1  | 2.445946  | 2.675456  | -1.579317 |
| 6  | 0.783602  | 3.423574  | -0.392095 |
| 1  | 0.622068  | 3.958097  | 0.546027  |
| 1  | 0.355787  | 4.015509  | -1.206015 |
| 1  | 0.251972  | 2.471625  | -0.346040 |

53

Ph-SO4 RCS=2.6

|   |          |           |           |
|---|----------|-----------|-----------|
| 6 | 2.520276 | -3.738296 | -3.242965 |
| 6 | 3.047088 | -2.459667 | -3.048605 |
| 6 | 2.706470 | -1.721257 | -1.922786 |

S76

|    |           |           |           |
|----|-----------|-----------|-----------|
| 6  | 1.825904  | -2.263854 | -0.968709 |
| 6  | 1.312214  | -3.561109 | -1.161596 |
| 6  | 1.652126  | -4.285020 | -2.297992 |
| 1  | 2.789047  | -4.307831 | -4.125987 |
| 1  | 3.729943  | -2.035765 | -3.776214 |
| 1  | 3.135263  | -0.739507 | -1.762883 |
| 1  | 0.636557  | -3.977413 | -0.424897 |
| 1  | 1.240358  | -5.277196 | -2.444813 |
| 6  | 1.429794  | -1.527484 | 0.189411  |
| 6  | 0.527849  | -1.022649 | 0.964037  |
| 6  | 0.757905  | -0.323476 | 2.318348  |
| 6  | 2.104870  | -0.819256 | 2.930296  |
| 6  | 0.674107  | 1.194319  | 2.117215  |
| 1  | -0.299505 | 1.458157  | 1.698002  |
| 1  | 0.773706  | 1.696690  | 3.080728  |
| 1  | 1.444494  | 1.556338  | 1.437300  |
| 6  | 2.530299  | -0.027048 | 4.171019  |
| 1  | 3.369325  | -0.525369 | 4.661647  |
| 1  | 1.698873  | 0.025908  | 4.878926  |
| 8  | -0.214541 | -0.745364 | 3.275171  |
| 1  | -1.097410 | -0.531909 | 2.941043  |
| 53 | -1.525601 | -1.044822 | 0.215251  |
| 1  | 1.909281  | -1.850937 | 3.229217  |
| 1  | 2.845926  | 0.987262  | 3.918248  |
| 16 | 3.460579  | -0.917290 | 1.693928  |
| 1  | 3.901496  | 0.952113  | 1.090847  |
| 8  | 4.232424  | 1.906977  | 0.873096  |
| 8  | -3.983469 | -1.028438 | -0.562126 |
| 8  | 4.348015  | 1.237900  | -1.541135 |
| 8  | 4.734406  | 3.606473  | -0.814629 |
| 8  | -6.414710 | -0.556428 | -0.450015 |
| 8  | -4.918716 | 0.187079  | 1.399673  |
| 16 | -5.069350 | -0.150595 | -0.024724 |
| 16 | 4.060400  | 2.337815  | -0.628650 |
| 8  | -4.735006 | 1.273391  | -0.861145 |
| 8  | 2.446602  | 2.577007  | -0.618461 |
| 6  | -5.632549 | 2.360272  | -0.603759 |
| 1  | -5.617360 | 2.600037  | 0.465487  |
| 1  | -6.651116 | 2.062552  | -0.876572 |
| 6  | -5.167435 | 3.542812  | -1.436021 |
| 1  | -5.178491 | 3.293181  | -2.499993 |
| 1  | -5.827690 | 4.400967  | -1.273245 |
| 1  | -4.149931 | 3.831756  | -1.161021 |
| 6  | 1.827669  | 2.925535  | -1.893597 |
| 1  | 2.294762  | 3.842808  | -2.262972 |
| 1  | 2.015895  | 2.114606  | -2.601280 |
| 6  | 0.348000  | 3.113146  | -1.633715 |
| 1  | 0.178467  | 3.914461  | -0.911676 |
| 1  | -0.152251 | 3.378987  | -2.569072 |
| 1  | -0.106390 | 2.196243  | -1.254929 |

53

Ph-SO4 RCS=2.8

|   |           |           |           |
|---|-----------|-----------|-----------|
| 6 | 2.716091  | -3.723413 | -3.248198 |
| 6 | 3.074006  | -2.381012 | -3.101314 |
| 6 | 2.650386  | -1.656966 | -1.995925 |
| 6 | 1.857115  | -2.281879 | -1.012590 |
| 6 | 1.515346  | -3.642627 | -1.157966 |
| 6 | 1.935874  | -4.350595 | -2.275771 |
| 1 | 3.049240  | -4.280977 | -4.116798 |
| 1 | 3.691536  | -1.897389 | -3.849527 |
| 1 | 2.956712  | -0.626647 | -1.863253 |
| 1 | 0.908712  | -4.118530 | -0.397586 |
| 1 | 1.657872  | -5.392420 | -2.388207 |
| 6 | 1.382043  | -1.568046 | 0.115728  |
| 6 | 0.539417  | -1.055756 | 0.932516  |
| 6 | 0.760365  | -0.366501 | 2.295083  |
| 6 | 2.115322  | -0.834752 | 2.916203  |
| 6 | 0.642025  | 1.149839  | 2.105716  |
| 1 | -0.339016 | 1.398006  | 1.694041  |
| 1 | 0.736833  | 1.644835  | 3.073349  |

|    |           |           |           |
|----|-----------|-----------|-----------|
| 1  | 1.401556  | 1.533829  | 1.426509  |
| 6  | 2.455518  | -0.078743 | 4.207688  |
| 1  | 3.293927  | -0.567003 | 4.708764  |
| 1  | 1.595938  | -0.083535 | 4.883216  |
| 8  | -0.211195 | -0.822541 | 3.236815  |
| 1  | -1.094350 | -0.593925 | 2.914549  |
| 53 | -1.537890 | -1.089657 | 0.176689  |
| 1  | 1.952732  | -1.884746 | 3.168488  |
| 1  | 2.745814  | 0.954717  | 4.007315  |
| 16 | 3.533543  | -0.828968 | 1.748152  |
| 1  | 3.859442  | 0.994321  | 1.134677  |
| 8  | 4.160371  | 1.971120  | 0.887683  |
| 8  | -3.966548 | -1.080826 | -0.553686 |
| 8  | 4.201108  | 1.296139  | -1.526888 |
| 8  | 4.638533  | 3.660314  | -0.820828 |
| 8  | -6.388973 | -0.583357 | -0.427367 |
| 8  | -4.872354 | 0.159765  | 1.407293  |
| 16 | -5.039865 | -0.183074 | -0.012731 |
| 16 | 3.957515  | 2.398788  | -0.603252 |
| 8  | -4.693822 | 1.225785  | -0.862450 |
| 8  | 2.344225  | 2.664520  | -0.557331 |
| 6  | -5.572911 | 2.329608  | -0.606117 |
| 1  | -5.541446 | 2.579317  | 0.460279  |
| 1  | -6.598363 | 2.043729  | -0.864824 |
| 6  | -5.098980 | 3.495495  | -1.456145 |
| 1  | -5.126639 | 3.235131  | -2.517159 |
| 1  | -5.743898 | 4.365313  | -1.294524 |
| 1  | -4.074073 | 3.771302  | -1.195912 |
| 6  | 1.718076  | 3.083355  | -1.804318 |
| 1  | 2.186860  | 4.016598  | -2.128860 |
| 1  | 1.894562  | 2.311812  | -2.558279 |
| 6  | 0.240875  | 3.264196  | -1.523656 |
| 1  | 0.081941  | 4.024105  | -0.755763 |
| 1  | -0.265151 | 3.585571  | -2.438335 |
| 1  | -0.215839 | 2.329931  | -1.192906 |

53

Ph-SO4 RCS=3.0

|    |           |           |           |
|----|-----------|-----------|-----------|
| 6  | 2.931352  | -3.803807 | -3.102913 |
| 6  | 3.186410  | -2.433290 | -3.008135 |
| 6  | 2.671296  | -1.693844 | -1.953796 |
| 6  | 1.890763  | -2.334540 | -0.967798 |
| 6  | 1.652639  | -3.723183 | -1.060357 |
| 6  | 2.163638  | -4.445500 | -2.128948 |
| 1  | 3.336042  | -4.373048 | -3.932706 |
| 1  | 3.796345  | -1.939962 | -3.756048 |
| 1  | 2.901717  | -0.640180 | -1.854187 |
| 1  | 1.056346  | -4.208154 | -0.297502 |
| 1  | 1.968063  | -5.509203 | -2.202632 |
| 6  | 1.333701  | -1.607253 | 0.103528  |
| 6  | 0.544432  | -1.048134 | 0.927487  |
| 6  | 0.732790  | -0.317185 | 2.273538  |
| 6  | 2.084857  | -0.732647 | 2.943467  |
| 6  | 0.584330  | 1.189280  | 2.036592  |
| 1  | -0.397992 | 1.406391  | 1.610451  |
| 1  | 0.662071  | 1.713384  | 2.990122  |
| 1  | 1.341840  | 1.569188  | 1.353477  |
| 6  | 2.325263  | 0.033745  | 4.253520  |
| 1  | 3.155846  | -0.425077 | 4.793423  |
| 1  | 1.434037  | -0.001688 | 4.885582  |
| 8  | -0.251924 | -0.772314 | 3.202162  |
| 1  | -1.130856 | -0.545655 | 2.867992  |
| 53 | -1.546532 | -1.114265 | 0.126849  |
| 1  | 1.953987  | -1.788858 | 3.189117  |
| 1  | 2.590896  | 1.076295  | 4.066470  |
| 16 | 3.573796  | -0.671122 | 1.865808  |
| 1  | 3.792889  | 1.052764  | 1.199158  |
| 8  | 4.061576  | 2.055229  | 0.883744  |
| 8  | -3.932300 | -1.122308 | -0.590317 |
| 8  | 4.115973  | 1.274289  | -1.496305 |
| 8  | 4.574129  | 3.662053  | -0.899812 |

S78

|    |           |           |           |
|----|-----------|-----------|-----------|
| 8  | -6.354106 | -0.641836 | -0.450573 |
| 8  | -4.838003 | 0.081663  | 1.394425  |
| 16 | -5.010534 | -0.234240 | -0.029904 |
| 16 | 3.882521  | 2.416984  | -0.616848 |
| 8  | -4.670731 | 1.184019  | -0.857361 |
| 8  | 2.266966  | 2.707592  | -0.606877 |
| 6  | -5.548316 | 2.285816  | -0.578717 |
| 1  | -5.507605 | 2.519866  | 0.490648  |
| 1  | -6.575332 | 2.002918  | -0.833730 |
| 6  | -5.079784 | 3.462087  | -1.416651 |
| 1  | -5.116776 | 3.216467  | -2.480790 |
| 1  | -5.722557 | 4.329894  | -1.237447 |
| 1  | -4.052675 | 3.733468  | -1.161032 |
| 6  | 1.678204  | 3.127916  | -1.867449 |
| 1  | 2.164082  | 4.054949  | -2.184858 |
| 1  | 1.863628  | 2.353116  | -2.616626 |
| 6  | 0.195749  | 3.325553  | -1.625279 |
| 1  | 0.026303  | 4.089300  | -0.863296 |
| 1  | -0.284838 | 3.649475  | -2.552817 |
| 1  | -0.278366 | 2.397220  | -1.301887 |

53

Ph-SO4 RCS=3.2

|    |           |           |           |
|----|-----------|-----------|-----------|
| 6  | 2.602741  | -3.625825 | -3.474829 |
| 6  | 2.846769  | -2.286880 | -3.168491 |
| 6  | 2.249492  | -1.697288 | -2.060918 |
| 6  | 1.404817  | -2.478021 | -1.242555 |
| 6  | 1.171996  | -3.836752 | -1.547645 |
| 6  | 1.764685  | -4.400475 | -2.665555 |
| 1  | 3.070318  | -4.073745 | -4.345257 |
| 1  | 3.508627  | -1.694707 | -3.789319 |
| 1  | 2.458440  | -0.662970 | -1.796405 |
| 1  | 0.522746  | -4.421355 | -0.907372 |
| 1  | 1.581922  | -5.440753 | -2.908984 |
| 6  | 0.810618  | -1.892961 | -0.109923 |
| 6  | 0.210452  | -1.330428 | 0.832078  |
| 6  | 0.393153  | -0.728195 | 2.222932  |
| 6  | 1.530282  | -1.464745 | 3.011854  |
| 6  | 0.629410  | 0.778838  | 2.055311  |
| 1  | -0.182714 | 1.222446  | 1.474561  |
| 1  | 0.638522  | 1.247772  | 3.040368  |
| 1  | 1.573516  | 0.991910  | 1.551566  |
| 6  | 1.782495  | -0.813499 | 4.378342  |
| 1  | 2.423272  | -1.464074 | 4.976262  |
| 1  | 0.839421  | -0.662498 | 4.908322  |
| 8  | -0.760027 | -0.982392 | 3.023440  |
| 1  | -1.523434 | -0.532432 | 2.636688  |
| 53 | -1.883349 | -1.049739 | -0.145690 |
| 1  | 1.152816  | -2.477818 | 3.170587  |
| 1  | 2.291610  | 0.146249  | 4.272990  |
| 16 | 3.110933  | -1.750110 | 2.110020  |
| 1  | 3.425296  | -0.459142 | 1.787390  |
| 8  | 3.878285  | 1.278496  | 1.135343  |
| 8  | -4.115092 | -0.692220 | -0.797466 |
| 8  | 3.109155  | 1.166163  | -1.223851 |
| 8  | 5.448106  | 1.833140  | -0.726487 |
| 8  | -6.413808 | 0.165813  | -0.583943 |
| 8  | -4.804626 | 0.455354  | 1.307700  |
| 16 | -5.033456 | 0.327021  | -0.134050 |
| 16 | 4.057749  | 1.765897  | -0.252284 |
| 8  | -4.446068 | 1.712920  | -0.832802 |
| 8  | 3.547895  | 3.357458  | -0.084922 |
| 6  | -5.077383 | 2.942258  | -0.420760 |
| 1  | -4.966484 | 3.055451  | 0.662217  |
| 1  | -6.144191 | 2.894175  | -0.662333 |
| 6  | -4.391586 | 4.069572  | -1.169050 |
| 1  | -4.501205 | 3.939525  | -2.248090 |
| 1  | -4.837401 | 5.028287  | -0.886842 |
| 1  | -3.326055 | 4.099349  | -0.931162 |
| 6  | 3.590243  | 4.148500  | -1.280149 |
| 1  | 4.619097  | 4.183371  | -1.655076 |

S79

|   |          |          |           |
|---|----------|----------|-----------|
| 1 | 2.958179 | 3.683515 | -2.044772 |
| 6 | 3.087846 | 5.537231 | -0.924873 |
| 1 | 3.717888 | 5.989933 | -0.155053 |
| 1 | 3.103844 | 6.180773 | -1.810501 |
| 1 | 2.063123 | 5.492124 | -0.547903 |

53

Ph-SO4 RCS=3.4

|    |           |           |           |
|----|-----------|-----------|-----------|
| 6  | 2.484527  | -3.571358 | -3.600701 |
| 6  | 2.770672  | -2.256260 | -3.235143 |
| 6  | 2.188040  | -1.695380 | -2.104105 |
| 6  | 1.315775  | -2.482386 | -1.324031 |
| 6  | 1.037199  | -3.815706 | -1.689077 |
| 6  | 1.617077  | -4.350762 | -2.828436 |
| 1  | 2.940801  | -3.996463 | -4.488395 |
| 1  | 3.453537  | -1.658896 | -3.827705 |
| 1  | 2.424496  | -0.678442 | -1.798216 |
| 1  | 0.365380  | -4.406115 | -1.077918 |
| 1  | 1.400554  | -5.373053 | -3.116580 |
| 6  | 0.749955  | -1.924526 | -0.157977 |
| 6  | 0.262611  | -1.388631 | 0.851939  |
| 6  | 0.408972  | -0.814003 | 2.250368  |
| 6  | 1.541554  | -1.546427 | 3.054088  |
| 6  | 0.622384  | 0.700354  | 2.122880  |
| 1  | -0.191181 | 1.145533  | 1.545351  |
| 1  | 0.614123  | 1.143840  | 3.119560  |
| 1  | 1.567412  | 0.941668  | 1.633238  |
| 6  | 1.714411  | -0.940030 | 4.453750  |
| 1  | 2.354047  | -1.593188 | 5.050158  |
| 1  | 0.748068  | -0.838969 | 4.952474  |
| 8  | -0.759775 | -1.106964 | 3.019753  |
| 1  | -1.518251 | -0.651088 | 2.631021  |
| 53 | -1.876600 | -1.055638 | -0.178504 |
| 1  | 1.191043  | -2.575919 | 3.160223  |
| 1  | 2.196995  | 0.037877  | 4.405212  |
| 16 | 3.174644  | -1.750710 | 2.219137  |
| 1  | 3.428736  | -0.450374 | 1.893476  |
| 8  | 3.806998  | 1.315018  | 1.164581  |
| 8  | -4.066197 | -0.651075 | -0.799511 |
| 8  | 3.053512  | 1.150532  | -1.197472 |
| 8  | 5.387499  | 1.832820  | -0.698898 |
| 8  | -6.334581 | 0.272508  | -0.577188 |
| 8  | -4.726852 | 0.473562  | 1.329295  |
| 16 | -4.955729 | 0.389119  | -0.114291 |
| 16 | 3.994226  | 1.771331  | -0.231418 |
| 8  | -4.318176 | 1.762531  | -0.782232 |
| 8  | 3.480229  | 3.367179  | -0.102931 |
| 6  | -4.888092 | 3.010079  | -0.330298 |
| 1  | -4.759219 | 3.088235  | 0.753448  |
| 1  | -5.958393 | 3.016352  | -0.560329 |
| 6  | -4.158718 | 4.122540  | -1.058529 |
| 1  | -4.287179 | 4.026298  | -2.138939 |
| 1  | -4.555934 | 5.092942  | -0.745764 |
| 1  | -3.090447 | 4.096498  | -0.833413 |
| 6  | 3.532500  | 4.131661  | -1.314028 |
| 1  | 4.564142  | 4.157871  | -1.682177 |
| 1  | 2.905856  | 3.651061  | -2.073626 |
| 6  | 3.028893  | 5.528494  | -0.993156 |
| 1  | 3.653492  | 5.997142  | -0.228423 |
| 1  | 3.052305  | 6.152813  | -1.892340 |
| 1  | 2.001303  | 5.492520  | -0.622906 |

53

Ph-SO4 RCS=3.6

|   |          |           |           |
|---|----------|-----------|-----------|
| 6 | 2.259015 | -3.524203 | -3.764252 |
| 6 | 2.623319 | -2.248082 | -3.336628 |
| 6 | 2.094181 | -1.716645 | -2.164661 |
| 6 | 1.194883 | -2.493588 | -1.409395 |
| 6 | 0.832977 | -3.784718 | -1.837524 |
| 6 | 1.362968 | -4.292012 | -3.014782 |
| 1 | 2.674228 | -3.926279 | -4.682298 |

S80

|    |           |           |           |
|----|-----------|-----------|-----------|
| 1  | 3.325191  | -1.656548 | -3.912813 |
| 1  | 2.383707  | -0.727244 | -1.817545 |
| 1  | 0.138299  | -4.368831 | -1.245967 |
| 1  | 1.082891  | -5.284401 | -3.349424 |
| 6  | 0.690096  | -1.961951 | -0.194203 |
| 6  | 0.360757  | -1.460139 | 0.885198  |
| 6  | 0.466739  | -0.909172 | 2.285141  |
| 6  | 1.610408  | -1.621682 | 3.094005  |
| 6  | 0.631619  | 0.614326  | 2.200353  |
| 1  | -0.194679 | 1.048725  | 1.633009  |
| 1  | 0.607269  | 1.029490  | 3.208757  |
| 1  | 1.568815  | 0.899112  | 1.718416  |
| 6  | 1.720161  | -1.057364 | 4.517306  |
| 1  | 2.374671  | -1.703265 | 5.105597  |
| 1  | 0.739461  | -1.015902 | 4.996138  |
| 8  | -0.707541 | -1.260876 | 3.028172  |
| 1  | -1.470265 | -0.811252 | 2.641029  |
| 53 | -1.868682 | -1.062302 | -0.192203 |
| 1  | 1.301034  | -2.667732 | 3.156192  |
| 1  | 2.161314  | -0.058925 | 4.514859  |
| 16 | 3.275967  | -1.729604 | 2.299647  |
| 1  | 3.452943  | -0.422159 | 1.957224  |
| 8  | 3.738393  | 1.354943  | 1.172810  |
| 8  | -4.015632 | -0.609115 | -0.762726 |
| 8  | 3.001813  | 1.110633  | -1.188538 |
| 8  | 5.314782  | 1.865616  | -0.695743 |
| 8  | -6.237697 | 0.408105  | -0.532015 |
| 8  | -4.627883 | 0.518543  | 1.382402  |
| 16 | -4.860044 | 0.468945  | -0.060558 |
| 16 | 3.920838  | 1.778514  | -0.233855 |
| 8  | -4.157314 | 1.811811  | -0.712313 |
| 8  | 3.365385  | 3.365323  | -0.148877 |
| 6  | -4.636055 | 3.085200  | -0.220940 |
| 1  | -4.478323 | 3.129297  | 0.860506  |
| 1  | -5.708261 | 3.164242  | -0.426828 |
| 6  | -3.851249 | 4.162450  | -0.943524 |
| 1  | -4.009982 | 4.098991  | -2.022231 |
| 1  | -4.176932 | 5.149226  | -0.601145 |
| 1  | -2.782487 | 4.061782  | -0.743848 |
| 6  | 3.407978  | 4.099358  | -1.378364 |
| 1  | 4.441121  | 4.140646  | -1.741062 |
| 1  | 2.797974  | 3.585189  | -2.129639 |
| 6  | 2.869832  | 5.491993  | -1.097102 |
| 1  | 3.478124  | 5.994654  | -0.340841 |
| 1  | 2.884767  | 6.093464  | -2.011959 |
| 1  | 1.840868  | 5.441547  | -0.732251 |

53

Ph-SO4 RCS=3.8

|   |           |           |           |
|---|-----------|-----------|-----------|
| 6 | 2.028402  | -3.497517 | -3.893879 |
| 6 | 2.471616  | -2.262692 | -3.422201 |
| 6 | 1.997809  | -1.752742 | -2.216755 |
| 6 | 1.070661  | -2.507257 | -1.475585 |
| 6 | 0.625207  | -3.753367 | -1.948678 |
| 6 | 1.104338  | -4.242155 | -3.156552 |
| 1 | 2.401973  | -3.883562 | -4.836354 |
| 1 | 3.192633  | -1.686001 | -3.989938 |
| 1 | 2.342398  | -0.792315 | -1.840655 |
| 1 | -0.092437 | -4.321241 | -1.368674 |
| 1 | 0.760294  | -5.202449 | -3.523959 |
| 6 | 0.625025  | -1.993428 | -0.220885 |
| 6 | 0.458153  | -1.524180 | 0.904739  |
| 6 | 0.532680  | -0.984010 | 2.302461  |
| 6 | 1.681402  | -1.672536 | 3.127171  |
| 6 | 0.655097  | 0.544934  | 2.242172  |
| 1 | -0.181605 | 0.964632  | 1.679257  |
| 1 | 0.617532  | 0.944092  | 3.256515  |
| 1 | 1.584408  | 0.862251  | 1.764915  |
| 6 | 1.728898  | -1.139403 | 4.565734  |
| 1 | 2.394138  | -1.773461 | 5.155048  |
| 1 | 0.735678  | -1.149103 | 5.019675  |



S81

|    |           |           |           |
|----|-----------|-----------|-----------|
| 8  | -0.647057 | -1.380258 | 3.020630  |
| 1  | -1.412266 | -0.937603 | 2.630500  |
| 53 | -1.879430 | -1.059892 | -0.201531 |
| 1  | 1.410982  | -2.730636 | 3.156135  |
| 1  | 2.130206  | -0.124871 | 4.599440  |
| 16 | 3.376653  | -1.697312 | 2.383124  |
| 1  | 3.486334  | -0.391878 | 2.007978  |
| 8  | 3.699748  | 1.374046  | 1.168188  |
| 8  | -3.994671 | -0.557206 | -0.718533 |
| 8  | 2.970231  | 1.054966  | -1.187083 |
| 8  | 5.273462  | 1.850549  | -0.711062 |
| 8  | -6.167378 | 0.549206  | -0.471611 |
| 8  | -4.552008 | 0.575016  | 1.442805  |
| 16 | -4.790412 | 0.555473  | 0.001581  |
| 16 | 3.879443  | 1.758977  | -0.250089 |
| 8  | -4.029299 | 1.866292  | -0.639770 |
| 8  | 3.305684  | 3.342439  | -0.210058 |
| 6  | -4.416747 | 3.157597  | -0.110556 |
| 1  | -4.229419 | 3.167679  | 0.966674  |
| 1  | -5.486767 | 3.305507  | -0.287422 |
| 6  | -3.584685 | 4.198417  | -0.832914 |
| 1  | -3.774270 | 4.167781  | -1.907990 |
| 1  | -3.839839 | 5.195739  | -0.462681 |
| 1  | -2.519742 | 4.027956  | -0.663063 |
| 6  | 3.344607  | 4.042226  | -1.459058 |
| 1  | 4.378251  | 4.083634  | -1.820416 |
| 1  | 2.741713  | 3.501725  | -2.197592 |
| 6  | 2.792308  | 5.437030  | -1.218362 |
| 1  | 3.393559  | 5.966526  | -0.474874 |
| 1  | 2.803968  | 6.012877  | -2.149641 |
| 1  | 1.762839  | 5.386850  | -0.854785 |

53

Ph-SO4 RCS=4.0

|    |           |           |           |
|----|-----------|-----------|-----------|
| 6  | 1.909411  | -3.484094 | -3.970854 |
| 6  | 2.394299  | -2.273112 | -3.478745 |
| 6  | 1.949394  | -1.774373 | -2.257364 |
| 6  | 1.007549  | -2.514607 | -1.522018 |
| 6  | 0.517764  | -3.734322 | -2.016032 |
| 6  | 0.970227  | -4.213870 | -3.238610 |
| 1  | 2.261207  | -3.861852 | -4.924986 |
| 1  | 3.125646  | -1.706012 | -4.043045 |
| 1  | 2.322466  | -0.830373 | -1.867608 |
| 1  | -0.212502 | -4.291357 | -1.441203 |
| 1  | 0.592357  | -5.155495 | -3.620990 |
| 6  | 0.591221  | -2.010566 | -0.247533 |
| 6  | 0.531775  | -1.571264 | 0.900225  |
| 6  | 0.577612  | -1.046076 | 2.301987  |
| 6  | 1.721202  | -1.716265 | 3.153064  |
| 6  | 0.662649  | 0.486228  | 2.267276  |
| 1  | -0.184149 | 0.894196  | 1.711043  |
| 1  | 0.615627  | 0.868123  | 3.287813  |
| 1  | 1.582858  | 0.833915  | 1.793502  |
| 6  | 1.670643  | -1.245200 | 4.613765  |
| 1  | 2.346749  | -1.865449 | 5.205557  |
| 1  | 0.661423  | -1.331921 | 5.020894  |
| 8  | -0.611553 | -1.482334 | 2.985514  |
| 1  | -1.375951 | -1.047622 | 2.584847  |
| 53 | -1.879268 | -1.052931 | -0.230307 |
| 1  | 1.503890  | -2.786413 | 3.125671  |
| 1  | 2.010243  | -0.212219 | 4.709013  |
| 16 | 3.461153  | -1.624591 | 2.511907  |
| 1  | 3.491806  | -0.332411 | 2.081941  |
| 8  | 3.647253  | 1.404806  | 1.165478  |
| 8  | -3.974544 | -0.513510 | -0.718856 |
| 8  | 2.939650  | 1.023037  | -1.187666 |
| 8  | 5.234254  | 1.843619  | -0.711412 |
| 8  | -6.120253 | 0.634177  | -0.449652 |
| 8  | -4.515147 | 0.570932  | 1.473437  |
| 16 | -4.747458 | 0.600445  | 0.032191  |
| 16 | 3.836703  | 1.754672  | -0.260659 |

S82

|   |           |          |           |
|---|-----------|----------|-----------|
| 8 | -3.951409 | 1.906474 | -0.569481 |
| 8 | 3.253824  | 3.336017 | -0.264470 |
| 6 | -4.287702 | 3.191716 | 0.010132  |
| 1 | -4.092370 | 3.154594 | 1.085143  |
| 1 | -5.352807 | 3.384328 | -0.152563 |
| 6 | -3.422825 | 4.226534 | -0.681218 |
| 1 | -3.621074 | 4.242352 | -1.755010 |
| 1 | -3.638510 | 5.218183 | -0.272763 |
| 1 | -2.363803 | 4.011192 | -0.526374 |
| 6 | 3.302589  | 4.005723 | -1.529286 |
| 1 | 4.339368  | 4.041215 | -1.882224 |
| 1 | 2.707741  | 3.446340 | -2.260318 |
| 6 | 2.744876  | 5.404565 | -1.327289 |
| 1 | 3.338137  | 5.953314 | -0.591377 |
| 1 | 2.763516  | 5.957921 | -2.272010 |
| 1 | 1.712274  | 5.360535 | -0.971829 |

53

Ph-SO4 RCS=4.2

|    |           |           |           |
|----|-----------|-----------|-----------|
| 6  | 3.013621  | -3.304787 | -3.526646 |
| 6  | 3.114299  | -1.946345 | -3.229052 |
| 6  | 2.471733  | -1.419143 | -2.114409 |
| 6  | 1.722643  | -2.274597 | -1.284381 |
| 6  | 1.624709  | -3.648538 | -1.586265 |
| 6  | 2.268695  | -4.156061 | -2.704666 |
| 1  | 3.517601  | -3.706283 | -4.399443 |
| 1  | 3.697926  | -1.284198 | -3.857527 |
| 1  | 2.567067  | -0.367429 | -1.874529 |
| 1  | 1.041394  | -4.295008 | -0.941489 |
| 1  | 2.193340  | -5.211946 | -2.938583 |
| 6  | 1.081131  | -1.760797 | -0.129978 |
| 6  | 0.565170  | -1.316682 | 0.901364  |
| 6  | 0.443673  | -0.932546 | 2.356113  |
| 6  | 1.707364  | -1.481521 | 3.133782  |
| 6  | 0.233715  | 0.578576  | 2.492266  |
| 1  | -0.747380 | 0.848845  | 2.094508  |
| 1  | 0.274504  | 0.853482  | 3.547373  |
| 1  | 0.995553  | 1.134416  | 1.945700  |
| 6  | 1.376349  | -1.838671 | 4.589531  |
| 1  | 2.285797  | -2.188180 | 5.085304  |
| 1  | 0.622658  | -2.623184 | 4.637227  |
| 8  | -0.665843 | -1.651956 | 2.911002  |
| 1  | -1.470137 | -1.377774 | 2.450086  |
| 53 | -1.549100 | -1.068407 | -0.388350 |
| 1  | 2.028890  | -2.390267 | 2.622848  |
| 1  | 1.005553  | -0.969617 | 5.137406  |
| 16 | 3.169438  | -0.343129 | 3.226983  |
| 1  | 3.204573  | 0.099822  | 1.937219  |
| 8  | 2.968869  | 0.843096  | 0.197000  |
| 8  | -3.661399 | -0.784982 | -1.166143 |
| 8  | 3.590115  | 1.695047  | -2.037134 |
| 8  | 4.811694  | 2.513301  | -0.028635 |
| 8  | -6.038267 | -0.182603 | -1.047048 |
| 8  | -4.695051 | -0.316613 | 1.061298  |
| 16 | -4.752659 | -0.044257 | -0.374455 |
| 16 | 3.568112  | 1.956672  | -0.580625 |
| 8  | -4.225971 | 1.503486  | -0.596428 |
| 8  | 2.397345  | 3.145955  | -0.357389 |
| 6  | -4.985835 | 2.537835  | 0.069711  |
| 1  | -4.975105 | 2.347505  | 1.146926  |
| 1  | -6.020328 | 2.502956  | -0.286344 |
| 6  | -4.326340 | 3.860147  | -0.269801 |
| 1  | -4.335327 | 4.030887  | -1.348453 |
| 1  | -4.866079 | 4.678072  | 0.216831  |
| 1  | -3.290158 | 3.875088  | 0.074223  |
| 6  | 2.665904  | 4.403613  | -0.989834 |
| 1  | 3.598065  | 4.818835  | -0.590884 |
| 1  | 2.789509  | 4.248876  | -2.067633 |
| 6  | 1.488758  | 5.319375  | -0.701343 |
| 1  | 1.366503  | 5.462284  | 0.375333  |
| 1  | 1.650361  | 6.297944  | -1.165281 |

S83

1 0.563817 4.894881 -1.099297

53

Ph-SO4 RCS=4.4

|    |           |           |           |
|----|-----------|-----------|-----------|
| 6  | 3.232678  | -3.397904 | -3.192808 |
| 6  | 3.236269  | -2.008920 | -3.068764 |
| 6  | 2.463664  | -1.392811 | -2.094111 |
| 6  | 1.690807  | -2.189219 | -1.216518 |
| 6  | 1.706876  | -3.602470 | -1.340702 |
| 6  | 2.466799  | -4.195444 | -2.331500 |
| 1  | 3.836804  | -3.870532 | -3.960061 |
| 1  | 3.848394  | -1.394692 | -3.717593 |
| 1  | 2.500774  | -0.316024 | -1.981669 |
| 1  | 1.112750  | -4.199046 | -0.659375 |
| 1  | 2.475926  | -5.274000 | -2.436933 |
| 6  | 0.933602  | -1.590566 | -0.210281 |
| 6  | 0.179404  | -1.081106 | 0.656749  |
| 6  | 0.524171  | -0.484483 | 2.031401  |
| 6  | 1.853273  | -1.220395 | 2.423129  |
| 6  | 0.635842  | 1.032037  | 1.848264  |
| 1  | -0.307277 | 1.422533  | 1.454045  |
| 1  | 0.833975  | 1.488615  | 2.818328  |
| 1  | 1.441478  | 1.293606  | 1.161723  |
| 6  | 1.594400  | -2.578999 | 3.078383  |
| 1  | 2.532484  | -3.131702 | 3.156557  |
| 1  | 0.884027  | -3.166694 | 2.491337  |
| 8  | -0.450892 | -0.809463 | 3.000954  |
| 1  | -1.247713 | -0.290359 | 2.834776  |
| 53 | -1.924534 | -1.019758 | -0.129202 |
| 1  | 2.412922  | -1.357601 | 1.498311  |
| 1  | 1.172459  | -2.459559 | 4.077352  |
| 16 | 2.994162  | -0.242330 | 3.448966  |
| 1  | 3.535409  | 0.431582  | 2.404162  |
| 8  | 3.645042  | 0.548003  | 0.315506  |
| 8  | -4.247859 | -0.922209 | -0.677166 |
| 8  | 3.920096  | 1.353017  | -2.009756 |
| 8  | 5.581238  | 2.010680  | -0.279289 |
| 8  | -6.614972 | -0.276730 | -0.444502 |
| 8  | -4.979420 | 0.358250  | 1.334522  |
| 16 | -5.239839 | 0.057592  | -0.076478 |
| 16 | 4.204101  | 1.593970  | -0.575039 |
| 8  | -4.826480 | 1.423774  | -0.932660 |
| 8  | 3.226743  | 2.898266  | -0.148148 |
| 6  | -5.578847 | 2.610896  | -0.618037 |
| 1  | -5.451227 | 2.845712  | 0.443597  |
| 1  | -6.640400 | 2.423822  | -0.810787 |
| 6  | -5.046920 | 3.726029  | -1.498841 |
| 1  | -5.171343 | 3.476256  | -2.555061 |
| 1  | -5.590045 | 4.653874  | -1.294253 |
| 1  | -3.985122 | 3.896487  | -1.307217 |
| 6  | 3.515076  | 4.137612  | -0.810329 |
| 1  | 4.548238  | 4.430197  | -0.594193 |
| 1  | 3.413066  | 4.001754  | -1.892858 |
| 6  | 2.530994  | 5.172428  | -0.293294 |
| 1  | 2.633363  | 5.295707  | 0.787727  |
| 1  | 2.717005  | 6.139345  | -0.771867 |
| 1  | 1.503073  | 4.871356  | -0.509625 |

53

Ph-SO4 RCS=4.6

|   |          |           |           |
|---|----------|-----------|-----------|
| 6 | 2.986351 | -3.740873 | -3.076131 |
| 6 | 3.078182 | -2.350300 | -3.029550 |
| 6 | 2.375033 | -1.632747 | -2.070577 |
| 6 | 1.584601 | -2.330759 | -1.128993 |
| 6 | 1.511780 | -3.745212 | -1.171465 |
| 6 | 2.201863 | -4.438967 | -2.148915 |
| 1 | 3.534628 | -4.291543 | -3.833179 |
| 1 | 3.704693 | -1.813309 | -3.731309 |
| 1 | 2.483135 | -0.554096 | -2.018960 |
| 1 | 0.904943 | -4.266026 | -0.440925 |
| 1 | 2.141184 | -5.520197 | -2.192002 |

S84

|    |           |           |           |
|----|-----------|-----------|-----------|
| 6  | 0.901229  | -1.627626 | -0.132143 |
| 6  | 0.243492  | -1.019599 | 0.743082  |
| 6  | 0.583024  | -0.288359 | 2.050353  |
| 6  | 1.934416  | -0.928675 | 2.509215  |
| 6  | 0.652494  | 1.206767  | 1.725666  |
| 1  | -0.297408 | 1.535203  | 1.293559  |
| 1  | 0.832248  | 1.754949  | 2.650782  |
| 1  | 1.457312  | 1.425040  | 1.023082  |
| 6  | 1.734738  | -2.291335 | 3.177673  |
| 1  | 2.702377  | -2.777694 | 3.313251  |
| 1  | 1.098405  | -2.937815 | 2.567653  |
| 8  | -0.379521 | -0.552951 | 3.052271  |
| 1  | -1.189158 | -0.068189 | 2.849250  |
| 53 | -1.903040 | -1.031578 | -0.029067 |
| 1  | 2.550212  | -1.025418 | 1.616635  |
| 1  | 1.255208  | -2.185047 | 4.151990  |
| 16 | 2.937374  | 0.145352  | 3.605324  |
| 1  | 3.566616  | 0.780376  | 2.589907  |
| 8  | 3.727263  | 0.552871  | 0.335377  |
| 8  | -4.213266 | -0.965398 | -0.516531 |
| 8  | 3.791222  | 1.124765  | -2.075949 |
| 8  | 5.577017  | 1.969227  | -0.567101 |
| 8  | -6.557996 | -0.239718 | -0.319760 |
| 8  | -4.874565 | 0.554113  | 1.348930  |
| 16 | -5.171432 | 0.105214  | -0.013723 |
| 16 | 4.188732  | 1.506683  | -0.698881 |
| 8  | -4.740888 | 1.349907  | -1.026848 |
| 8  | 3.224169  | 2.839816  | -0.324853 |
| 6  | -5.447919 | 2.590831  | -0.832047 |
| 1  | -5.283864 | 2.939172  | 0.192552  |
| 1  | -6.519365 | 2.418514  | -0.977566 |
| 6  | -4.905332 | 3.579507  | -1.846761 |
| 1  | -5.066629 | 3.216233  | -2.864287 |
| 1  | -5.413241 | 4.542525  | -1.736348 |
| 1  | -3.833953 | 3.734053  | -1.700823 |
| 6  | 3.436844  | 4.008973  | -1.127153 |
| 1  | 4.478141  | 4.332870  | -1.023936 |
| 1  | 3.253698  | 3.764378  | -2.179546 |
| 6  | 2.477388  | 5.080678  | -0.639317 |
| 1  | 2.660483  | 5.312152  | 0.412957  |
| 1  | 2.608964  | 5.996904  | -1.224005 |
| 1  | 1.441158  | 4.749765  | -0.743601 |

53

Ph-SO4 RCS=4.8

|    |           |           |           |
|----|-----------|-----------|-----------|
| 6  | 2.732466  | -4.085157 | -2.943429 |
| 6  | 2.953653  | -2.708718 | -2.934347 |
| 6  | 2.331406  | -1.901123 | -1.989244 |
| 6  | 1.490215  | -2.497333 | -1.024648 |
| 6  | 1.284414  | -3.896361 | -1.026603 |
| 6  | 1.896585  | -4.679143 | -1.990361 |
| 1  | 3.216827  | -4.704627 | -3.690783 |
| 1  | 3.616880  | -2.252171 | -3.659290 |
| 1  | 2.536011  | -0.833352 | -1.967617 |
| 1  | 0.637530  | -4.339125 | -0.279012 |
| 1  | 1.732407  | -5.750457 | -2.001988 |
| 6  | 0.890510  | -1.697429 | -0.037095 |
| 6  | 0.350201  | -0.989520 | 0.835083  |
| 6  | 0.644073  | -0.143800 | 2.076645  |
| 6  | 2.025242  | -0.653997 | 2.601739  |
| 6  | 0.638901  | 1.324906  | 1.641842  |
| 1  | -0.322689 | 1.574333  | 1.184377  |
| 1  | 0.784924  | 1.946164  | 2.525631  |
| 1  | 1.437277  | 1.532570  | 0.928275  |
| 6  | 1.920085  | -2.015281 | 3.293804  |
| 1  | 2.920630  | -2.401051 | 3.496207  |
| 1  | 1.389591  | -2.735209 | 2.664860  |
| 8  | -0.314283 | -0.387344 | 3.091692  |
| 1  | -1.144542 | 0.042033  | 2.851197  |
| 53 | -1.842937 | -1.054877 | 0.024876  |
| 1  | 2.688068  | -0.703414 | 1.739623  |

S85

|    |           |           |           |
|----|-----------|-----------|-----------|
| 1  | 1.375968  | -1.937268 | 4.236529  |
| 16 | 2.866194  | 0.533924  | 3.739144  |
| 1  | 3.544120  | 1.166310  | 2.755462  |
| 8  | 3.848182  | 0.717732  | 0.427942  |
| 8  | -4.120144 | -0.985526 | -0.442857 |
| 8  | 3.696975  | 0.885768  | -2.043261 |
| 8  | 5.501207  | 2.096831  | -0.839645 |
| 8  | -6.447064 | -0.209185 | -0.263781 |
| 8  | -4.738064 | 0.626836  | 1.360137  |
| 16 | -5.055935 | 0.130092  | 0.020239  |
| 16 | 4.152931  | 1.515391  | -0.779045 |
| 8  | -4.605923 | 1.314989  | -1.048147 |
| 8  | 3.102683  | 2.819514  | -0.549804 |
| 6  | -5.275641 | 2.584713  | -0.899525 |
| 1  | -5.086872 | 2.971853  | 0.106454  |
| 1  | -6.353124 | 2.436044  | -1.023914 |
| 6  | -4.718946 | 3.510427  | -1.964218 |
| 1  | -4.904886 | 3.107360  | -2.962279 |
| 1  | -5.197732 | 4.491561  | -1.890246 |
| 1  | -3.641837 | 3.640264  | -1.838631 |
| 6  | 3.162430  | 3.849835  | -1.544350 |
| 1  | 4.177026  | 4.261567  | -1.576955 |
| 1  | 2.932686  | 3.420340  | -2.526104 |
| 6  | 2.149686  | 4.915915  | -1.163030 |
| 1  | 2.380447  | 5.332669  | -0.179385 |
| 1  | 2.165387  | 5.728648  | -1.896481 |
| 1  | 1.140277  | 4.498379  | -1.131532 |

53

Ph-SO4 RCS=5.0

|    |           |           |           |
|----|-----------|-----------|-----------|
| 6  | 1.909365  | -4.627204 | -2.542204 |
| 6  | 2.363496  | -3.311122 | -2.618461 |
| 6  | 1.885554  | -2.348510 | -1.735779 |
| 6  | 0.953231  | -2.727147 | -0.748173 |
| 6  | 0.507370  | -4.061338 | -0.663047 |
| 6  | 0.980217  | -5.001080 | -1.566092 |
| 1  | 2.282517  | -5.368925 | -3.240245 |
| 1  | 3.097377  | -3.026961 | -3.363464 |
| 1  | 2.249176  | -1.323960 | -1.757029 |
| 1  | -0.210837 | -4.337210 | 0.099585  |
| 1  | 0.632076  | -6.026126 | -1.510101 |
| 6  | 0.518968  | -1.748536 | 0.176453  |
| 6  | 0.216689  | -0.846414 | 0.971788  |
| 6  | 0.590674  | 0.217033  | 1.996033  |
| 6  | 1.954703  | -0.227172 | 2.617928  |
| 6  | 0.668073  | 1.550869  | 1.243711  |
| 1  | -0.305428 | 1.788246  | 0.805294  |
| 1  | 0.944704  | 2.332504  | 1.950741  |
| 1  | 1.410331  | 1.496956  | 0.444296  |
| 6  | 1.826313  | -1.491608 | 3.471000  |
| 1  | 2.818383  | -1.824822 | 3.778828  |
| 1  | 1.348395  | -2.299859 | 2.909916  |
| 8  | -0.354793 | 0.259532  | 3.053465  |
| 1  | -1.164191 | 0.677396  | 2.735200  |
| 53 | -2.078639 | -0.887774 | 0.213840  |
| 1  | 2.652008  | -0.383012 | 1.795066  |
| 1  | 1.227502  | -1.303541 | 4.363802  |
| 16 | 2.753299  | 1.114939  | 3.628232  |
| 1  | 3.669401  | 1.416306  | 2.678716  |
| 8  | 4.550403  | 0.654838  | 0.783798  |
| 8  | -4.327082 | -0.690040 | -0.173250 |
| 8  | 2.983461  | 0.527328  | -1.136083 |
| 8  | 5.416244  | 0.254843  | -1.526834 |
| 8  | -6.541153 | 0.373807  | -0.153756 |
| 8  | -4.679511 | 1.376419  | 1.185473  |
| 16 | -5.112695 | 0.614196  | 0.014716  |
| 16 | 4.365959  | 0.827236  | -0.668811 |
| 8  | -4.580261 | 1.434750  | -1.319292 |
| 8  | 4.509477  | 2.495931  | -0.819706 |
| 6  | -5.067928 | 2.786744  | -1.466882 |
| 1  | -4.770189 | 3.369555  | -0.590248 |

S86

|   |           |          |           |
|---|-----------|----------|-----------|
| 1 | -6.160972 | 2.766314 | -1.523740 |
| 6 | -4.457991 | 3.343427 | -2.738712 |
| 1 | -4.754946 | 2.746116 | -3.603634 |
| 1 | -4.797616 | 4.372029 | -2.892866 |
| 1 | -3.367701 | 3.344357 | -2.675896 |
| 6 | 4.425869  | 3.009898 | -2.154747 |
| 1 | 5.228188  | 2.575829 | -2.761222 |
| 1 | 3.464774  | 2.721836 | -2.595819 |
| 6 | 4.556588  | 4.520967 | -2.070189 |
| 1 | 5.512977  | 4.800115 | -1.620888 |
| 1 | 4.501091  | 4.960389 | -3.071524 |
| 1 | 3.754380  | 4.944452 | -1.460768 |

53

Ph-SO4 RCS=5.2

|    |           |           |           |
|----|-----------|-----------|-----------|
| 6  | 1.578194  | -4.965377 | -2.057874 |
| 6  | 2.280580  | -3.761378 | -2.088700 |
| 6  | 1.869898  | -2.682565 | -1.311178 |
| 6  | 0.742278  | -2.827280 | -0.481154 |
| 6  | 0.036913  | -4.041370 | -0.446120 |
| 6  | 0.456143  | -5.102935 | -1.237342 |
| 1  | 1.902593  | -5.798456 | -2.672127 |
| 1  | 3.155571  | -3.653109 | -2.719274 |
| 1  | 2.411755  | -1.739890 | -1.314992 |
| 1  | -0.835144 | -4.138154 | 0.189122  |
| 1  | -0.091405 | -6.038418 | -1.215103 |
| 6  | 0.384819  | -1.716116 | 0.343140  |
| 6  | 0.339585  | -0.710160 | 1.059327  |
| 6  | 0.681718  | 0.496489  | 1.907282  |
| 6  | 2.070326  | 0.215351  | 2.579792  |
| 6  | 0.707553  | 1.716758  | 0.977779  |
| 1  | -0.273410 | 1.858705  | 0.515886  |
| 1  | 0.959856  | 2.596871  | 1.568595  |
| 1  | 1.454412  | 1.573292  | 0.194231  |
| 6  | 2.016375  | -0.957035 | 3.561005  |
| 1  | 3.022380  | -1.176824 | 3.920567  |
| 1  | 1.619263  | -1.854895 | 3.077329  |
| 8  | -0.260731 | 0.649814  | 2.962669  |
| 1  | -1.090770 | 0.978567  | 2.596569  |
| 53 | -2.102543 | -0.857647 | 0.318759  |
| 1  | 2.782095  | 0.016221  | 1.779767  |
| 1  | 1.381051  | -0.725313 | 4.417645  |
| 16 | 2.773095  | 1.721469  | 3.446348  |
| 1  | 3.751195  | 1.898283  | 2.527192  |
| 8  | 4.798416  | 0.972766  | 0.802956  |
| 8  | -4.320799 | -0.652250 | -0.019467 |
| 8  | 3.154584  | 0.183034  | -0.878369 |
| 8  | 5.579765  | -0.005627 | -1.361929 |
| 8  | -6.500027 | 0.473298  | -0.080304 |
| 8  | -4.576260 | 1.576033  | 1.084495  |
| 16 | -5.064428 | 0.696822  | 0.024256  |
| 16 | 4.526493  | 0.706310  | -0.620654 |
| 8  | -4.540955 | 1.325097  | -1.409262 |
| 8  | 4.504453  | 2.267859  | -1.247751 |
| 6  | -4.976786 | 2.671652  | -1.709539 |
| 1  | -4.627250 | 3.341461  | -0.918723 |
| 1  | -6.070827 | 2.692635  | -1.734917 |
| 6  | -4.384034 | 3.040012  | -3.055362 |
| 1  | -4.732908 | 2.356114  | -3.832172 |
| 1  | -4.685024 | 4.056484  | -3.325666 |
| 1  | -3.293292 | 2.999516  | -3.021261 |
| 6  | 4.326016  | 2.367193  | -2.665697 |
| 1  | 5.140099  | 1.837195  | -3.171823 |
| 1  | 3.378281  | 1.893921  | -2.947744 |
| 6  | 4.325445  | 3.843725  | -3.022991 |
| 1  | 5.269917  | 4.310251  | -2.731814 |
| 1  | 4.193050  | 3.970146  | -4.102516 |
| 1  | 3.512983  | 4.365082  | -2.510700 |

53

Ph-SO4 RCS=5.4

S87

|    |           |           |           |
|----|-----------|-----------|-----------|
| 6  | 1.434333  | -5.221331 | -1.363355 |
| 6  | 2.252929  | -4.093231 | -1.411509 |
| 6  | 1.860300  | -2.906306 | -0.800141 |
| 6  | 0.627139  | -2.858918 | -0.123734 |
| 6  | -0.198272 | -3.991367 | -0.077774 |
| 6  | 0.209322  | -5.167553 | -0.696841 |
| 1  | 1.747371  | -6.140738 | -1.846314 |
| 1  | 3.204973  | -4.128368 | -1.928805 |
| 1  | 2.487380  | -2.018944 | -0.834501 |
| 1  | -1.151504 | -3.942922 | 0.433993  |
| 1  | -0.431160 | -6.041669 | -0.661129 |
| 6  | 0.287775  | -1.623718 | 0.532272  |
| 6  | 0.446690  | -0.539232 | 1.117027  |
| 6  | 0.760352  | 0.809722  | 1.752610  |
| 6  | 2.148377  | 0.734372  | 2.496541  |
| 6  | 0.763366  | 1.853594  | 0.627757  |
| 1  | -0.212433 | 1.884986  | 0.135490  |
| 1  | 0.980285  | 2.828807  | 1.063444  |
| 1  | 1.528733  | 1.600657  | -0.108246 |
| 6  | 2.128869  | -0.272620 | 3.645889  |
| 1  | 3.131318  | -0.370785 | 4.064103  |
| 1  | 1.806037  | -1.257169 | 3.291018  |
| 8  | -0.209595 | 1.104555  | 2.753728  |
| 1  | -1.046648 | 1.325282  | 2.326980  |
| 53 | -2.119235 | -0.807986 | 0.449083  |
| 1  | 2.896909  | 0.459308  | 1.756046  |
| 1  | 1.446842  | 0.041326  | 4.438080  |
| 16 | 2.764885  | 2.413100  | 3.148190  |
| 1  | 3.766033  | 2.477550  | 2.240092  |
| 8  | 4.880681  | 1.246855  | 0.668919  |
| 8  | -4.338554 | -0.617748 | 0.156267  |
| 8  | 3.282130  | -0.052677 | -0.710722 |
| 8  | 5.714706  | -0.238117 | -1.163318 |
| 8  | -6.499059 | 0.530880  | -0.020828 |
| 8  | -4.513280 | 1.771581  | 0.870199  |
| 16 | -5.057568 | 0.737307  | -0.006504 |
| 16 | 4.624709  | 0.590752  | -0.625220 |
| 8  | -4.578291 | 1.098277  | -1.543191 |
| 8  | 4.516084  | 1.920807  | -1.652089 |
| 6  | -5.003192 | 2.383457  | -2.055648 |
| 1  | -4.612024 | 3.170650  | -1.404938 |
| 1  | -6.096838 | 2.424591  | -2.045289 |
| 6  | -4.457324 | 2.501535  | -3.464924 |
| 1  | -4.846922 | 1.702308  | -4.099179 |
| 1  | -4.752555 | 3.462869  | -3.895599 |
| 1  | -3.366848 | 2.443509  | -3.463168 |
| 6  | 4.341114  | 1.621829  | -3.042050 |
| 1  | 5.186867  | 1.021003  | -3.393362 |
| 1  | 3.423430  | 1.037297  | -3.176647 |
| 6  | 4.258930  | 2.943621  | -3.786368 |
| 1  | 5.173565  | 3.524047  | -3.641458 |
| 1  | 4.126382  | 2.764772  | -4.858435 |
| 1  | 3.414996  | 3.537921  | -3.427251 |
